# Supplementary material for: Homology Modeling and Analysis of Structure Predictions of the Bovine Rhinitis B Virus RNA Dependent RNA Polymerase (RdRp)
Source: MDPI journal article supplement (doi:10.3390/ijms13078998), 2012-07-19
Supplement: s1 [file s1]

REMARK     Output from the CPHmodels server
REMARK     Modeled made using method PDB Blast template E-value= 0.0
REMARK     Percent ID  65.42
PARENT     3kmq.A
MODEL
ATOM      1  N   GLU     8      26.398  43.425   4.932  1.00  0.02
ATOM      5  CA  GLU     8      27.364  43.353   6.037  1.00  0.02
ATOM      6  CB  GLU     8      26.897  44.209   7.206  1.00  0.00
ATOM      7  CG  GLU     8      26.766  45.668   6.790  1.00  0.02
ATOM      8  CD  GLU     8      26.332  46.516   7.980  1.00  0.01
ATOM      9  OE1 GLU     8      25.148  46.805   8.071  1.00  0.02
ATOM     10  OE2 GLU     8      27.207  46.925   8.730  1.00  0.03
ATOM     11  C   GLU     8      27.537  41.912   6.491  1.00  0.02
ATOM     12  O   GLU     8      26.577  41.135   6.540  1.00  0.02
ATOM     13  N   LYS     9      28.780  41.546   6.744  1.00  0.01
ATOM     15  CA  LYS     9      29.084  40.182   7.183  1.00  0.01
ATOM     16  CB  LYS     9      30.241  39.625   6.363  1.00  0.02
ATOM     17  CG  LYS     9      29.912  39.575   4.879  1.00  0.02
ATOM     18  CD  LYS     9      30.999  38.859   4.086  1.00  0.02
ATOM     19  CE  LYS     9      30.623  38.755   2.613  1.00  0.34
ATOM     20  NZ  LYS     9      31.668  38.059   1.846  1.00  1.32
ATOM     21  C   LYS     9      29.479  40.106   8.651  1.00  0.02
ATOM     22  O   LYS     9      30.549  40.577   9.055  1.00  0.00
ATOM     23  N   VAL    10      28.620  39.474   9.429  1.00  0.02
ATOM     25  CA  VAL    10      28.971  39.056  10.790  1.00  0.02
ATOM     26  CB  VAL    10      27.687  38.750  11.551  1.00  0.02
ATOM     27  CG1 VAL    10      27.981  38.365  12.996  1.00  0.02
ATOM     28  CG2 VAL    10      26.727  39.929  11.499  1.00  0.02
ATOM     29  C   VAL    10      29.819  37.787  10.701  1.00  0.01
ATOM     30  O   VAL    10      29.284  36.674  10.586  1.00  0.02
ATOM     31  N   HIS    11      31.127  37.974  10.650  1.00  0.02
ATOM     33  CA  HIS    11      32.040  36.845  10.472  1.00  0.02
ATOM     34  CB  HIS    11      33.403  37.348  10.009  1.00  0.02
ATOM     35  CG  HIS    11      34.385  36.222   9.745  1.00  0.02
ATOM     36  ND1 HIS    11      34.386  35.399   8.680  1.00  0.02
ATOM     38  CE1 HIS    11      35.398  34.516   8.798  1.00  0.02
ATOM     39  NE2 HIS    11      36.042  34.784   9.957  1.00  0.01
ATOM     40  CD2 HIS    11      35.428  35.832  10.553  1.00  0.02
ATOM     41  C   HIS    11      32.194  36.033  11.750  1.00  0.02
ATOM     42  O   HIS    11      32.521  36.548  12.825  1.00  0.01
ATOM     43  N   VAL    12      31.912  34.752  11.603  1.00  0.02
ATOM     45  CA  VAL    12      32.040  33.799  12.698  1.00  0.02
ATOM     46  CB  VAL    12      30.838  32.866  12.615  1.00  0.02
ATOM     47  CG1 VAL    12      29.563  33.617  12.971  1.00  0.01
ATOM     48  CG2 VAL    12      30.712  32.262  11.220  1.00  0.02
ATOM     49  C   VAL    12      33.356  33.030  12.603  1.00  0.02
ATOM     50  O   VAL    12      33.845  32.735  11.506  1.00  0.02
ATOM     51  N   SER    13      33.961  32.786  13.754  1.00  0.03
ATOM     53  CA  SER    13      35.211  32.016  13.792  1.00  0.03
ATOM     54  CB  SER    13      35.847  32.096  15.172  1.00  0.02
ATOM     55  OG  SER    13      36.921  31.160  15.176  1.00  0.47
ATOM     56  C   SER    13      34.974  30.552  13.471  1.00  0.01
ATOM     57  O   SER    13      34.220  29.855  14.157  1.00  0.02
ATOM     58  N   ARG    14      35.702  30.083  12.474  1.00  0.01
ATOM     60  CA  ARG    14      35.607  28.687  12.053  1.00  0.02
ATOM     61  CB  ARG    14      35.576  28.661  10.533  1.00  0.02
ATOM     62  CG  ARG    14      34.443  29.557  10.047  1.00  0.02
ATOM     63  CD  ARG    14      34.212  29.452   8.545  1.00  0.02
ATOM     64  NE  ARG    14      33.140  30.371   8.125  1.00  0.01
ATOM     65  CZ  ARG    14      31.846  30.043   8.071  1.00  0.02
ATOM     66  NH1 ARG    14      31.448  28.809   8.387  1.00  0.01
ATOM     67  NH2 ARG    14      30.948  30.949   7.681  1.00  0.01
ATOM     68  C   ARG    14      36.741  27.817  12.605  1.00  0.02
ATOM     69  O   ARG    14      36.823  26.625  12.276  1.00  0.01
ATOM     70  N   LYS    15      37.562  28.383  13.477  1.00  0.02
ATOM     72  CA  LYS    15      38.711  27.645  14.017  1.00  0.02
ATOM     73  CB  LYS    15      39.951  28.528  13.959  1.00  0.02
ATOM     74  CG  LYS    15      40.593  28.483  12.579  1.00  0.02
ATOM     75  CD  LYS    15      41.081  27.070  12.271  1.00  0.02
ATOM     76  CE  LYS    15      41.779  26.991  10.919  1.00  0.02
ATOM     77  NZ  LYS    15      42.268  25.626  10.664  1.00  0.02
ATOM     78  C   LYS    15      38.487  27.179  15.451  1.00  0.02
ATOM     79  O   LYS    15      38.001  27.930  16.305  1.00  0.02
ATOM     80  N   THR    16      38.831  25.924  15.683  1.00  0.02
ATOM     82  CA  THR    16      38.766  25.348  17.029  1.00  0.02
ATOM     83  CB  THR    16      38.403  23.869  16.928  1.00  0.01
ATOM     84  OG1 THR    16      38.481  23.315  18.238  1.00  0.01
ATOM     85  CG2 THR    16      39.367  23.100  16.030  1.00  0.02
ATOM     86  C   THR    16      40.091  25.511  17.770  1.00  0.01
ATOM     87  O   THR    16      41.168  25.502  17.166  1.00  0.02
ATOM     88  N   LYS    17      39.989  25.715  19.072  1.00  0.02
ATOM     90  CA  LYS    17      41.174  25.819  19.925  1.00  0.02
ATOM     91  CB  LYS    17      40.942  26.957  20.907  1.00  0.02
ATOM     92  CG  LYS    17      40.579  28.247  20.183  1.00  0.02
ATOM     93  CD  LYS    17      40.259  29.360  21.171  1.00  0.02
ATOM     94  CE  LYS    17      39.859  30.642  20.450  1.00  0.02
ATOM     95  NZ  LYS    17      39.546  31.709  21.413  1.00  0.02
ATOM     96  C   LYS    17      41.445  24.528  20.703  1.00  0.02
ATOM     97  O   LYS    17      42.416  24.467  21.470  1.00  0.02
ATOM     98  N   LEU    18      40.608  23.516  20.513  1.00  0.02
ATOM    100  CA  LEU    18      40.724  22.277  21.292  1.00  0.02
ATOM    101  CB  LEU    18      39.342  21.638  21.316  1.00  0.02
ATOM    102  CG  LEU    18      38.367  22.492  22.116  1.00  0.02
ATOM    103  CD1 LEU    18      36.928  22.292  21.658  1.00  0.01
ATOM    104  CD2 LEU    18      38.520  22.235  23.611  1.00  0.01
ATOM    105  C   LEU    18      41.726  21.310  20.671  1.00  0.01
ATOM    106  O   LEU    18      41.433  20.654  19.666  1.00  0.02
ATOM    107  N   ALA    19      42.870  21.184  21.320  1.00  0.02
ATOM    109  CA  ALA    19      43.937  20.311  20.828  1.00  0.01
ATOM    110  CB  ALA    19      45.273  20.864  21.314  1.00  0.02
ATOM    111  C   ALA    19      43.768  18.874  21.310  1.00  0.01
ATOM    112  O   ALA    19      43.371  18.623  22.457  1.00  0.01
ATOM    113  N   PRO    20      43.987  17.947  20.393  1.00  0.02
ATOM    114  CA  PRO    20      44.144  16.541  20.760  1.00  0.02
ATOM    115  CB  PRO    20      44.286  15.808  19.462  1.00  0.02
ATOM    116  CG  PRO    20      44.377  16.817  18.327  1.00  0.02
ATOM    117  CD  PRO    20      44.243  18.187  18.971  1.00  0.02
ATOM    118  C   PRO    20      45.373  16.354  21.643  1.00  0.02
ATOM    119  O   PRO    20      46.477  16.814  21.330  1.00  0.02
ATOM    120  N   THR    21      45.139  15.735  22.783  1.00  0.01
ATOM    122  CA  THR    21      46.205  15.485  23.758  1.00  0.01
ATOM    123  CB  THR    21      45.661  15.755  25.151  1.00  0.03
ATOM    124  OG1 THR    21      44.636  14.804  25.378  1.00  0.01
ATOM    125  CG2 THR    21      45.062  17.151  25.264  1.00  0.02
ATOM    126  C   THR    21      46.678  14.040  23.694  1.00  0.02
ATOM    127  O   THR    21      46.170  13.237  22.902  1.00  0.01
ATOM    128  N   VAL    22      47.512  13.671  24.654  1.00  0.01
ATOM    130  CA  VAL    22      48.055  12.306  24.704  1.00  0.02
ATOM    131  CB  VAL    22      49.284  12.311  25.615  1.00  0.02
ATOM    132  CG1 VAL    22      49.015  12.997  26.951  1.00  0.03
ATOM    133  CG2 VAL    22      49.856  10.912  25.819  1.00  0.01
ATOM    134  C   VAL    22      47.015  11.277  25.169  1.00  0.01
ATOM    135  O   VAL    22      47.010  10.148  24.659  1.00  0.02
ATOM    136  N   ALA    23      45.962  11.752  25.817  1.00  0.02
ATOM    138  CA  ALA    23      44.858  10.868  26.180  1.00  0.02
ATOM    139  CB  ALA    23      44.102  11.463  27.356  1.00  0.03
ATOM    140  C   ALA    23      43.900  10.626  25.014  1.00  0.02
ATOM    141  O   ALA    23      43.143   9.650  25.056  1.00  0.01
ATOM    142  N   TYR    24      44.079  11.335  23.908  1.00  0.01
ATOM    144  CA  TYR    24      43.261  11.054  22.731  1.00  0.03
ATOM    145  CB  TYR    24      43.247  12.264  21.804  1.00  0.01
ATOM    146  CG  TYR    24      42.249  12.126  20.658  1.00  0.02
ATOM    147  CD1 TYR    24      42.599  12.497  19.366  1.00  0.03
ATOM    148  CE1 TYR    24      41.679  12.365  18.333  1.00  0.02
ATOM    149  CZ  TYR    24      40.413  11.855  18.597  1.00  0.06
ATOM    150  OH  TYR    24      39.466  11.804  17.597  1.00  0.14
ATOM    151  CE2 TYR    24      40.066  11.472  19.884  1.00  0.07
ATOM    152  CD2 TYR    24      40.986  11.610  20.914  1.00  0.02
ATOM    153  C   TYR    24      43.835   9.853  21.992  1.00  0.02
ATOM    154  O   TYR    24      43.072   9.019  21.495  1.00  0.02
ATOM    155  N   GLY    25      45.125   9.630  22.181  1.00  0.02
ATOM    157  CA  GLY    25      45.775   8.455  21.608  1.00  0.02
ATOM    158  C   GLY    25      45.568   7.242  22.509  1.00  0.03
ATOM    159  O   GLY    25      45.272   6.148  22.021  1.00  0.02
ATOM    160  N   VAL    26      45.628   7.460  23.813  1.00  0.02
ATOM    162  CA  VAL    26      45.511   6.340  24.754  1.00  0.02
ATOM    163  CB  VAL    26      46.164   6.783  26.062  1.00  0.02
ATOM    164  CG1 VAL    26      46.046   5.727  27.156  1.00  0.03
ATOM    165  CG2 VAL    26      47.628   7.136  25.828  1.00  0.02
ATOM    166  C   VAL    26      44.069   5.876  25.012  1.00  0.02
ATOM    167  O   VAL    26      43.853   4.683  25.256  1.00  0.02
ATOM    168  N   PHE    27      43.092   6.758  24.876  1.00  0.02
ATOM    170  CA  PHE    27      41.706   6.349  25.143  1.00  0.01
ATOM    171  CB  PHE    27      41.073   7.354  26.098  1.00  0.02
ATOM    172  CG  PHE    27      41.705   7.412  27.485  1.00  0.02
ATOM    173  CD1 PHE    27      42.030   6.238  28.154  1.00  0.02
ATOM    174  CE1 PHE    27      42.605   6.295  29.416  1.00  0.03
ATOM    175  CZ  PHE    27      42.846   7.525  30.013  1.00  0.02
ATOM    176  CE2 PHE    27      42.507   8.699  29.352  1.00  0.01
ATOM    177  CD2 PHE    27      41.932   8.641  28.089  1.00  0.02
ATOM    178  C   PHE    27      40.848   6.271  23.886  1.00  0.01
ATOM    179  O   PHE    27      39.837   5.556  23.882  1.00  0.02
ATOM    180  N   ARG    28      41.307   6.920  22.825  1.00  0.02
ATOM    182  CA  ARG    28      40.553   7.084  21.562  1.00  0.02
ATOM    183  CB  ARG    28      40.920   5.923  20.644  1.00  0.02
ATOM    184  CG  ARG    28      42.407   5.934  20.308  1.00  0.01
ATOM    185  CD  ARG    28      42.794   4.761  19.413  1.00  1.19
ATOM    186  NE  ARG    28      44.229   4.800  19.083  1.00  1.29
ATOM    187  CZ  ARG    28      45.121   3.939  19.580  1.00  2.17
ATOM    188  NH1 ARG    28      44.726   2.977  20.416  1.00  3.24
ATOM    189  NH2 ARG    28      46.409   4.042  19.242  1.00  2.28
ATOM    190  C   ARG    28      39.026   7.145  21.708  1.00  0.01
ATOM    191  O   ARG    28      38.346   6.175  21.357  1.00  0.02
ATOM    192  N   PRO    29      38.487   8.229  22.254  1.00  0.01
ATOM    193  CA  PRO    29      37.034   8.406  22.262  1.00  0.01
ATOM    194  CB  PRO    29      36.785   9.513  23.240  1.00  0.02
ATOM    195  CG  PRO    29      38.104  10.203  23.541  1.00  0.01
ATOM    196  CD  PRO    29      39.171   9.399  22.820  1.00  0.02
ATOM    197  C   PRO    29      36.522   8.793  20.879  1.00  0.01
ATOM    198  O   PRO    29      37.246   9.415  20.092  1.00  0.02
ATOM    199  N   ASN    30      35.243   8.544  20.648  1.00  0.02
ATOM    201  CA  ASN    30      34.583   8.929  19.385  1.00  0.02
ATOM    202  CB  ASN    30      33.400   7.996  19.148  1.00  0.02
ATOM    203  CG  ASN    30      33.860   6.541  19.136  1.00  0.01
ATOM    204  OD1 ASN    30      34.906   6.207  18.569  1.00  0.28
ATOM    205  ND2 ASN    30      33.058   5.691  19.752  1.00  0.39
ATOM    208  C   ASN    30      34.066  10.370  19.423  1.00  0.01
ATOM    209  O   ASN    30      32.876  10.624  19.188  1.00  0.01
ATOM    210  N   TYR    31      34.965  11.298  19.699  1.00  0.02
ATOM    212  CA  TYR    31      34.616  12.707  19.881  1.00  0.01
ATOM    213  CB  TYR    31      34.749  13.072  21.360  1.00  0.01
ATOM    214  CG  TYR    31      33.655  12.545  22.291  1.00  0.01
ATOM    215  CD1 TYR    31      33.717  11.252  22.799  1.00  0.02
ATOM    216  CE1 TYR    31      32.722  10.789  23.650  1.00  0.01
ATOM    217  CZ  TYR    31      31.669  11.623  23.997  1.00  0.02
ATOM    218  OH  TYR    31      30.699  11.175  24.866  1.00  0.09
ATOM    219  CE2 TYR    31      31.605  12.916  23.496  1.00  0.01
ATOM    220  CD2 TYR    31      32.600  13.376  22.645  1.00  0.02
ATOM    221  C   TYR    31      35.538  13.596  19.055  1.00  0.01
ATOM    222  O   TYR    31      36.590  13.158  18.577  1.00  0.01
ATOM    223  N   GLY    32      35.114  14.832  18.870  1.00  0.01
ATOM    225  CA  GLY    32      35.924  15.802  18.131  1.00  0.01
ATOM    226  C   GLY    32      35.372  17.211  18.288  1.00  0.02
ATOM    227  O   GLY    32      34.217  17.402  18.684  1.00  0.02
ATOM    228  N   PRO    33      36.227  18.188  18.051  1.00  0.02
ATOM    229  CA  PRO    33      35.778  19.576  18.006  1.00  0.02
ATOM    230  CB  PRO    33      37.004  20.381  17.714  1.00  0.02
ATOM    231  CG  PRO    33      38.191  19.444  17.545  1.00  0.02
ATOM    232  CD  PRO    33      37.648  18.037  17.737  1.00  0.02
ATOM    233  C   PRO    33      34.708  19.755  16.937  1.00  0.01
ATOM    234  O   PRO    33      34.724  19.083  15.902  1.00  0.01
ATOM    235  N   ALA    34      33.708  20.546  17.274  1.00  0.02
ATOM    237  CA  ALA    34      32.612  20.833  16.349  1.00  0.01
ATOM    238  CB  ALA    34      31.655  21.808  17.021  1.00  0.02
ATOM    239  C   ALA    34      33.133  21.446  15.059  1.00  0.01
ATOM    240  O   ALA    34      34.065  22.260  15.073  1.00  0.02
ATOM    241  N   ALA    35      32.585  20.983  13.949  1.00  0.01
ATOM    243  CA  ALA    35      32.953  21.535  12.645  1.00  0.01
ATOM    244  CB  ALA    35      32.346  20.656  11.557  1.00  0.01
ATOM    245  C   ALA    35      32.404  22.949  12.533  1.00  0.02
ATOM    246  O   ALA    35      31.187  23.152  12.505  1.00  0.01
ATOM    247  N   LEU    36      33.298  23.921  12.533  1.00  0.02
ATOM    249  CA  LEU    36      32.852  25.314  12.513  1.00  0.01
ATOM    250  CB  LEU    36      33.760  26.125  13.430  1.00  0.01
ATOM    251  CG  LEU    36      33.836  25.566  14.848  1.00  0.02
ATOM    252  CD1 LEU    36      34.904  26.287  15.659  1.00  0.02
ATOM    253  CD2 LEU    36      32.492  25.640  15.560  1.00  0.02
ATOM    254  C   LEU    36      32.882  25.889  11.099  1.00  0.02
ATOM    255  O   LEU    36      32.278  26.930  10.825  1.00  0.02
ATOM    256  N   SER    37      33.550  25.199  10.195  1.00  0.02
ATOM    258  CA  SER    37      33.571  25.658   8.805  1.00  0.01
ATOM    259  CB  SER    37      34.993  25.530   8.274  1.00  0.02
ATOM    260  OG  SER    37      34.972  25.913   6.905  1.00  0.02
ATOM    261  C   SER    37      32.634  24.856   7.910  1.00  0.02
ATOM    262  O   SER    37      32.654  23.622   7.946  1.00  0.02
ATOM    263  N   ASN    38      32.043  25.545   6.944  1.00  0.02
ATOM    265  CA  ASN    38      31.260  24.886   5.886  1.00  0.02
ATOM    266  CB  ASN    38      30.460  25.938   5.118  1.00  0.01
ATOM    267  CG  ASN    38      29.281  26.485   5.921  1.00  0.02
ATOM    268  OD1 ASN    38      28.478  25.723   6.474  1.00  0.01
ATOM    269  ND2 ASN    38      29.114  27.794   5.854  1.00  0.01
ATOM    272  C   ASN    38      32.125  24.128   4.866  1.00  0.02
ATOM    273  O   ASN    38      31.574  23.363   4.068  1.00  0.01
ATOM    274  N   SER    39      33.445  24.269   4.915  1.00  0.02
ATOM    276  CA  SER    39      34.323  23.502   4.025  1.00  0.02
ATOM    277  CB  SER    39      35.337  24.445   3.389  1.00  0.02
ATOM    278  OG  SER    39      36.182  24.935   4.424  1.00  1.16
ATOM    279  C   SER    39      35.069  22.422   4.809  1.00  0.02
ATOM    280  O   SER    39      36.126  21.954   4.371  1.00  0.02
ATOM    281  N   ASP    40      34.596  22.148   6.015  1.00  0.02
ATOM    283  CA  ASP    40      35.253  21.188   6.906  1.00  0.02
ATOM    284  CB  ASP    40      34.475  21.214   8.217  1.00  0.02
ATOM    285  CG  ASP    40      35.268  20.621   9.370  1.00  0.01
ATOM    286  OD1 ASP    40      35.583  19.440   9.298  1.00  0.02
ATOM    287  OD2 ASP    40      35.545  21.363  10.302  1.00  0.02
ATOM    288  C   ASP    40      35.226  19.784   6.303  1.00  0.02
ATOM    289  O   ASP    40      34.152  19.205   6.111  1.00  0.01
ATOM    290  N   THR    41      36.398  19.169   6.244  1.00  0.02
ATOM    292  CA  THR    41      36.560  17.851   5.603  1.00  0.02
ATOM    293  CB  THR    41      38.032  17.656   5.268  1.00  0.01
ATOM    294  OG1 THR    41      38.747  17.511   6.488  1.00  0.09
ATOM    295  CG2 THR    41      38.600  18.843   4.498  1.00  0.16
ATOM    296  C   THR    41      36.106  16.663   6.457  1.00  0.01
ATOM    297  O   THR    41      36.253  15.515   6.027  1.00  0.02
ATOM    298  N   ARG    42      35.636  16.921   7.667  1.00  0.01
ATOM    300  CA  ARG    42      35.052  15.869   8.495  1.00  0.02
ATOM    301  CB  ARG    42      35.410  16.145   9.949  1.00  0.02
ATOM    302  CG  ARG    42      36.919  16.095  10.153  1.00  0.02
ATOM    303  CD  ARG    42      37.295  16.462  11.582  1.00  0.01
ATOM    304  NE  ARG    42      36.891  17.844  11.881  1.00  0.02
ATOM    305  CZ  ARG    42      36.789  18.322  13.122  1.00  0.01
ATOM    306  NH1 ARG    42      37.026  17.523  14.164  1.00  0.02
ATOM    307  NH2 ARG    42      36.429  19.592  13.319  1.00  0.01
ATOM    308  C   ARG    42      33.533  15.797   8.339  1.00  0.01
ATOM    309  O   ARG    42      32.903  14.935   8.960  1.00  0.02
ATOM    310  N   LEU    43      32.958  16.701   7.560  1.00  0.01
ATOM    312  CA  LEU    43      31.513  16.678   7.297  1.00  0.00
ATOM    313  CB  LEU    43      31.076  18.039   6.760  1.00  0.02
ATOM    314  CG  LEU    43      31.200  19.154   7.788  1.00  0.01
ATOM    315  CD1 LEU    43      30.911  20.510   7.152  1.00  0.02
ATOM    316  CD2 LEU    43      30.264  18.908   8.962  1.00  0.01
ATOM    317  C   LEU    43      31.153  15.638   6.244  1.00  0.01
ATOM    318  O   LEU    43      31.954  15.329   5.355  1.00  0.01
ATOM    319  N   ASN    44      29.941  15.120   6.345  1.00  0.01
ATOM    321  CA  ASN    44      29.391  14.291   5.270  1.00  0.01
ATOM    322  CB  ASN    44      28.019  13.749   5.662  1.00  0.01
ATOM    323  CG  ASN    44      28.103  12.755   6.813  1.00  0.02
ATOM    324  OD1 ASN    44      28.870  11.786   6.761  1.00  0.01
ATOM    325  ND2 ASN    44      27.277  12.981   7.820  1.00  0.02
ATOM    328  C   ASN    44      29.233  15.149   4.022  1.00  0.01
ATOM    329  O   ASN    44      28.998  16.362   4.108  1.00  0.01
ATOM    330  N   GLU    45      29.390  14.524   2.868  1.00  0.01
ATOM    332  CA  GLU    45      29.263  15.260   1.605  1.00  0.01
ATOM    333  CB  GLU    45      29.657  14.345   0.450  1.00  0.01
ATOM    334  CG  GLU    45      31.127  13.941   0.528  1.00  0.02
ATOM    335  CD  GLU    45      32.030  15.165   0.381  1.00  0.02
ATOM    336  OE1 GLU    45      31.634  16.086  -0.320  1.00  0.01
ATOM    337  OE2 GLU    45      33.110  15.143   0.953  1.00  0.01
ATOM    338  C   GLU    45      27.838  15.769   1.410  1.00  0.01
ATOM    339  O   GLU    45      26.886  14.987   1.335  1.00  0.01
ATOM    340  N   GLY    46      27.705  17.085   1.436  1.00  0.01
ATOM    342  CA  GLY    46      26.398  17.721   1.266  1.00  0.02
ATOM    343  C   GLY    46      25.903  18.399   2.546  1.00  0.01
ATOM    344  O   GLY    46      24.837  19.027   2.537  1.00  0.01
ATOM    345  N   VAL    47      26.645  18.258   3.634  1.00  0.01
ATOM    347  CA  VAL    47      26.225  18.882   4.894  1.00  0.02
ATOM    348  CB  VAL    47      26.889  18.162   6.063  1.00  0.02
ATOM    349  CG1 VAL    47      26.774  18.965   7.352  1.00  0.01
ATOM    350  CG2 VAL    47      26.295  16.772   6.247  1.00  0.02
ATOM    351  C   VAL    47      26.561  20.370   4.938  1.00  0.02
ATOM    352  O   VAL    47      27.732  20.770   4.951  1.00  0.02
ATOM    353  N   VAL    48      25.520  21.182   4.860  1.00  0.01
ATOM    355  CA  VAL    48      25.689  22.622   5.050  1.00  0.02
ATOM    356  CB  VAL    48      24.644  23.362   4.225  1.00  0.01
ATOM    357  CG1 VAL    48      24.916  24.861   4.238  1.00  0.02
ATOM    358  CG2 VAL    48      24.631  22.849   2.789  1.00  0.01
ATOM    359  C   VAL    48      25.519  22.933   6.533  1.00  0.01
ATOM    360  O   VAL    48      24.389  22.936   7.044  1.00  0.02
ATOM    361  N   LEU    49      26.608  23.359   7.153  1.00  0.02
ATOM    363  CA  LEU    49      26.676  23.501   8.614  1.00  0.01
ATOM    364  CB  LEU    49      28.061  24.026   8.968  1.00  0.01
ATOM    365  CG  LEU    49      28.200  24.309  10.457  1.00  0.01
ATOM    366  CD1 LEU    49      28.264  23.011  11.248  1.00  0.01
ATOM    367  CD2 LEU    49      29.435  25.158  10.721  1.00  0.01
ATOM    368  C   LEU    49      25.632  24.463   9.163  1.00  0.02
ATOM    369  O   LEU    49      24.767  24.038   9.938  1.00  0.01
ATOM    370  N   ASP    50      25.515  25.629   8.548  1.00  0.02
ATOM    372  CA  ASP    50      24.557  26.623   9.051  1.00  0.02
ATOM    373  CB  ASP    50      24.881  28.004   8.485  1.00  0.02
ATOM    374  CG  ASP    50      25.331  27.973   7.024  1.00  0.01
ATOM    375  OD1 ASP    50      26.400  28.518   6.770  1.00  0.01
ATOM    376  OD2 ASP    50      24.677  27.338   6.211  1.00  0.01
ATOM    377  C   ASP    50      23.085  26.279   8.811  1.00  0.01
ATOM    378  O   ASP    50      22.277  26.579   9.698  1.00  0.01
ATOM    379  N   ASN    51      22.788  25.392   7.875  1.00  0.01
ATOM    381  CA  ASN    51      21.387  25.024   7.664  1.00  0.01
ATOM    382  CB  ASN    51      21.182  24.575   6.223  1.00  0.01
ATOM    383  CG  ASN    51      21.325  25.751   5.257  1.00  0.01
ATOM    384  OD1 ASN    51      21.453  26.913   5.662  1.00  1.09
ATOM    385  ND2 ASN    51      21.255  25.435   3.977  1.00  1.10
ATOM    388  C   ASN    51      20.972  23.915   8.625  1.00  0.02
ATOM    389  O   ASN    51      19.837  23.925   9.118  1.00  0.01
ATOM    390  N   VAL    52      21.957  23.176   9.112  1.00  0.01
ATOM    392  CA  VAL    52      21.685  22.157  10.124  1.00  0.01
ATOM    393  CB  VAL    52      22.824  21.140  10.122  1.00  0.01
ATOM    394  CG1 VAL    52      22.585  20.048  11.160  1.00  0.01
ATOM    395  CG2 VAL    52      23.004  20.524   8.740  1.00  0.01
ATOM    396  C   VAL    52      21.572  22.813  11.498  1.00  0.01
ATOM    397  O   VAL    52      20.693  22.444  12.287  1.00  0.01
ATOM    398  N   ILE    53      22.261  23.930  11.665  1.00  0.01
ATOM    400  CA  ILE    53      22.160  24.687  12.916  1.00  0.01
ATOM    401  CB  ILE    53      23.306  25.691  12.971  1.00  0.00
ATOM    402  CG2 ILE    53      23.212  26.543  14.231  1.00  0.02
ATOM    403  CG1 ILE    53      24.657  24.993  12.911  1.00  0.01
ATOM    404  CD1 ILE    53      25.796  26.005  12.945  1.00  0.02
ATOM    405  C   ILE    53      20.836  25.444  13.011  1.00  0.01
ATOM    406  O   ILE    53      20.145  25.348  14.031  1.00  0.02
ATOM    407  N   PHE    54      20.380  26.005  11.904  1.00  0.01
ATOM    409  CA  PHE    54      19.139  26.785  11.945  1.00  0.01
ATOM    410  CB  PHE    54      19.190  27.858  10.866  1.00  0.01
ATOM    411  CG  PHE    54      20.158  28.986  11.208  1.00  0.02
ATOM    412  CD1 PHE    54      21.173  29.337  10.328  1.00  0.01
ATOM    413  CE1 PHE    54      22.053  30.359  10.655  1.00  0.01
ATOM    414  CZ  PHE    54      21.916  31.033  11.862  1.00  0.01
ATOM    415  CE2 PHE    54      20.899  30.685  12.741  1.00  0.01
ATOM    416  CD2 PHE    54      20.021  29.661  12.414  1.00  0.01
ATOM    417  C   PHE    54      17.868  25.950  11.813  1.00  0.02
ATOM    418  O   PHE    54      16.802  26.425  12.229  1.00  0.01
ATOM    419  N   SER    55      18.011  24.669  11.512  1.00  0.01
ATOM    421  CA  SER    55      16.840  23.793  11.369  1.00  0.01
ATOM    422  CB  SER    55      17.197  22.615  10.471  1.00  0.01
ATOM    423  OG  SER    55      18.186  21.841  11.132  1.00  0.01
ATOM    424  C   SER    55      16.303  23.261  12.699  1.00  0.01
ATOM    425  O   SER    55      15.278  22.566  12.702  1.00  0.01
ATOM    426  N   LYS    56      16.924  23.616  13.816  1.00  0.01
ATOM    428  CA  LYS    56      16.389  23.197  15.117  1.00  0.01
ATOM    429  CB  LYS    56      17.540  23.018  16.104  1.00  0.01
ATOM    430  CG  LYS    56      18.339  24.300  16.308  1.00  0.02
ATOM    431  CD  LYS    56      19.567  24.059  17.179  1.00  0.02
ATOM    432  CE  LYS    56      20.410  25.323  17.312  1.00  0.01
ATOM    433  NZ  LYS    56      21.627  25.072  18.100  1.00  0.01
ATOM    434  C   LYS    56      15.351  24.183  15.665  1.00  0.01
ATOM    435  O   LYS    56      14.577  23.815  16.557  1.00  0.01
ATOM    436  N   HIS    57      15.192  25.317  14.997  1.00  0.01
ATOM    438  CA  HIS    57      14.222  26.341  15.410  1.00  0.01
ATOM    439  CB  HIS    57      14.847  27.702  15.136  1.00  0.02
ATOM    440  CG  HIS    57      16.257  27.886  15.661  1.00  0.01
ATOM    441  ND1 HIS    57      17.358  28.078  14.912  1.00  0.01
ATOM    443  CE1 HIS    57      18.431  28.210  15.718  1.00  0.00
ATOM    444  NE2 HIS    57      17.996  28.105  16.994  1.00  0.01
ATOM    445  CD2 HIS    57      16.658  27.907  16.976  1.00  0.01
ATOM    446  C   HIS    57      12.938  26.240  14.587  1.00  0.01
ATOM    447  O   HIS    57      12.414  27.252  14.108  1.00  0.01
ATOM    448  N   ASN    58      12.429  25.028  14.457  1.00  0.00
ATOM    450  CA  ASN    58      11.389  24.736  13.469  1.00  0.01
ATOM    451  CB  ASN    58      11.643  23.315  12.960  1.00  0.00
ATOM    452  CG  ASN    58      11.762  22.314  14.114  1.00  0.01
ATOM    453  OD1 ASN    58      10.805  22.082  14.860  1.00  0.83
ATOM    454  ND2 ASN    58      12.930  21.702  14.221  1.00  0.87
ATOM    457  C   ASN    58       9.934  24.870  13.932  1.00  0.00
ATOM    458  O   ASN    58       9.045  24.790  13.075  1.00  0.01
ATOM    459  N   SER    59       9.662  25.138  15.201  1.00  0.01
ATOM    461  CA  SER    59       8.248  25.136  15.609  1.00  0.01
ATOM    462  CB  SER    59       7.852  23.689  15.889  1.00  0.01
ATOM    463  OG  SER    59       8.806  23.136  16.787  1.00  0.01
ATOM    464  C   SER    59       7.881  26.003  16.816  1.00  0.01
ATOM    465  O   SER    59       8.116  25.629  17.971  1.00  0.02
ATOM    466  N   ASN    60       7.205  27.106  16.533  1.00  0.01
ATOM    468  CA  ASN    60       6.536  27.890  17.584  1.00  0.01
ATOM    469  CB  ASN    60       6.547  29.375  17.205  1.00  0.02
ATOM    470  CG  ASN    60       5.804  30.225  18.241  1.00  0.01
ATOM    471  OD1 ASN    60       5.612  29.808  19.388  1.00  0.01
ATOM    472  ND2 ASN    60       5.385  31.410  17.834  1.00  1.50
ATOM    475  C   ASN    60       5.098  27.384  17.713  1.00  0.01
ATOM    476  O   ASN    60       4.208  27.792  16.959  1.00  0.01
ATOM    477  N   VAL    61       4.885  26.484  18.658  1.00  0.01
ATOM    479  CA  VAL    61       3.565  25.856  18.806  1.00  0.01
ATOM    480  CB  VAL    61       3.723  24.583  19.628  1.00  0.01
ATOM    481  CG1 VAL    61       4.414  23.497  18.812  1.00  1.14
ATOM    482  CG2 VAL    61       4.480  24.849  20.923  1.00  0.01
ATOM    483  C   VAL    61       2.515  26.778  19.429  1.00  0.01
ATOM    484  O   VAL    61       2.649  27.276  20.554  1.00  0.02
ATOM    485  N   VAL    62       1.459  26.999  18.667  1.00  0.02
ATOM    487  CA  VAL    62       0.337  27.807  19.149  1.00  0.01
ATOM    488  CB  VAL    62      -0.340  28.470  17.954  1.00  0.01
ATOM    489  CG1 VAL    62      -1.512  29.341  18.397  1.00  0.06
ATOM    490  CG2 VAL    62       0.666  29.296  17.160  1.00  0.14
ATOM    491  C   VAL    62      -0.653  26.930  19.908  1.00  0.02
ATOM    492  O   VAL    62      -1.352  26.092  19.329  1.00  0.01
ATOM    493  N   LEU    63      -0.637  27.089  21.219  1.00  0.01
ATOM    495  CA  LEU    63      -1.533  26.332  22.094  1.00  0.01
ATOM    496  CB  LEU    63      -1.034  26.367  23.543  1.00  0.02
ATOM    497  CG  LEU    63       0.155  25.448  23.847  1.00  0.01
ATOM    498  CD1 LEU    63       1.500  26.050  23.450  1.00  0.84
ATOM    499  CD2 LEU    63       0.190  25.132  25.337  1.00  0.84
ATOM    500  C   LEU    63      -2.940  26.915  22.040  1.00  0.01
ATOM    501  O   LEU    63      -3.120  28.119  21.830  1.00  0.01
ATOM    502  N   GLY    64      -3.927  26.054  22.224  1.00  0.01
ATOM    504  CA  GLY    64      -5.322  26.504  22.277  1.00  0.02
ATOM    505  C   GLY    64      -5.562  27.331  23.535  1.00  0.01
ATOM    506  O   GLY    64      -4.786  27.244  24.496  1.00  0.01
ATOM    507  N   GLU    65      -6.728  27.952  23.611  1.00  0.02
ATOM    509  CA  GLU    65      -7.019  28.877  24.718  1.00  0.01
ATOM    510  CB  GLU    65      -8.317  29.614  24.403  1.00  0.01
ATOM    511  CG  GLU    65      -8.624  30.704  25.429  1.00  0.19
ATOM    512  CD  GLU    65      -7.593  31.828  25.341  1.00  0.95
ATOM    513  OE1 GLU    65      -7.104  32.053  24.242  1.00  1.57
ATOM    514  OE2 GLU    65      -7.378  32.488  26.346  1.00  1.31
ATOM    515  C   GLU    65      -7.158  28.175  26.069  1.00  0.01
ATOM    516  O   GLU    65      -6.635  28.691  27.062  1.00  0.02
ATOM    517  N   LYS    66      -7.571  26.917  26.059  1.00  0.00
ATOM    519  CA  LYS    66      -7.664  26.159  27.311  1.00  0.01
ATOM    520  CB  LYS    66      -8.576  24.961  27.078  1.00  0.02
ATOM    521  CG  LYS    66      -8.728  24.122  28.342  1.00  0.01
ATOM    522  CD  LYS    66      -9.611  22.904  28.102  1.00  0.01
ATOM    523  CE  LYS    66      -9.742  22.062  29.366  1.00  0.29
ATOM    524  NZ  LYS    66     -10.588  20.882  29.129  1.00  1.04
ATOM    525  C   LYS    66      -6.291  25.672  27.778  1.00  0.01
ATOM    526  O   LYS    66      -6.012  25.695  28.983  1.00  0.02
ATOM    527  N   ASP    67      -5.361  25.573  26.842  1.00  0.02
ATOM    529  CA  ASP    67      -4.013  25.123  27.179  1.00  0.01
ATOM    530  CB  ASP    67      -3.329  24.583  25.930  1.00  0.01
ATOM    531  CG  ASP    67      -4.159  23.503  25.249  1.00  0.01
ATOM    532  OD1 ASP    67      -4.724  22.673  25.947  1.00  0.01
ATOM    533  OD2 ASP    67      -4.244  23.553  24.027  1.00  0.01
ATOM    534  C   ASP    67      -3.207  26.306  27.693  1.00  0.02
ATOM    535  O   ASP    67      -2.481  26.170  28.683  1.00  0.01
ATOM    536  N   LEU    68      -3.540  27.488  27.198  1.00  0.01
ATOM    538  CA  LEU    68      -2.886  28.707  27.672  1.00  0.01
ATOM    539  CB  LEU    68      -3.150  29.824  26.668  1.00  0.02
ATOM    540  CG  LEU    68      -2.484  29.547  25.326  1.00  0.02
ATOM    541  CD1 LEU    68      -2.953  30.538  24.267  1.00  0.38
ATOM    542  CD2 LEU    68      -0.963  29.567  25.455  1.00  0.29
ATOM    543  C   LEU    68      -3.418  29.121  29.038  1.00  0.01
ATOM    544  O   LEU    68      -2.622  29.495  29.907  1.00  0.01
ATOM    545  N   ALA    69      -4.676  28.809  29.306  1.00  0.01
ATOM    547  CA  ALA    69      -5.250  29.113  30.618  1.00  0.02
ATOM    548  CB  ALA    69      -6.769  29.052  30.511  1.00  0.01
ATOM    549  C   ALA    69      -4.771  28.131  31.683  1.00  0.02
ATOM    550  O   ALA    69      -4.374  28.564  32.773  1.00  0.01
ATOM    551  N   LEU    70      -4.558  26.885  31.289  1.00  0.01
ATOM    553  CA  LEU    70      -4.047  25.896  32.238  1.00  0.01
ATOM    554  CB  LEU    70      -4.292  24.496  31.682  1.00  0.01
ATOM    555  CG  LEU    70      -3.838  23.411  32.657  1.00  0.02
ATOM    556  CD1 LEU    70      -4.567  23.528  33.993  1.00  0.02
ATOM    557  CD2 LEU    70      -4.036  22.020  32.063  1.00  0.02
ATOM    558  C   LEU    70      -2.557  26.100  32.491  1.00  0.02
ATOM    559  O   LEU    70      -2.148  26.106  33.658  1.00  0.02
ATOM    560  N   TYR    71      -1.832  26.562  31.484  1.00  0.01
ATOM    562  CA  TYR    71      -0.402  26.807  31.667  1.00  0.02
ATOM    563  CB  TYR    71       0.272  26.894  30.303  1.00  0.01
ATOM    564  CG  TYR    71       1.796  26.855  30.370  1.00  0.00
ATOM    565  CD1 TYR    71       2.443  25.628  30.399  1.00  0.02
ATOM    566  CE1 TYR    71       3.828  25.575  30.464  1.00  0.01
ATOM    567  CZ  TYR    71       4.565  26.751  30.501  1.00  0.02
ATOM    568  OH  TYR    71       5.930  26.692  30.691  1.00  0.10
ATOM    569  CE2 TYR    71       3.923  27.981  30.466  1.00  0.02
ATOM    570  CD2 TYR    71       2.536  28.031  30.401  1.00  0.02
ATOM    571  C   TYR    71      -0.157  28.099  32.438  1.00  0.02
ATOM    572  O   TYR    71       0.751  28.134  33.276  1.00  0.02
ATOM    573  N   ARG    72      -1.085  29.039  32.351  1.00  0.02
ATOM    575  CA  ARG    72      -0.974  30.268  33.135  1.00  0.02
ATOM    576  CB  ARG    72      -1.905  31.315  32.537  1.00  0.02
ATOM    577  CG  ARG    72      -1.840  32.617  33.324  1.00  0.02
ATOM    578  CD  ARG    72      -2.791  33.665  32.760  1.00  0.02
ATOM    579  NE  ARG    72      -2.456  33.992  31.365  1.00  0.01
ATOM    580  CZ  ARG    72      -1.971  35.178  30.990  1.00  0.01
ATOM    581  NH1 ARG    72      -1.789  35.445  29.696  1.00  0.02
ATOM    582  NH2 ARG    72      -1.749  36.127  31.902  1.00  0.02
ATOM    583  C   ARG    72      -1.347  30.022  34.594  1.00  0.02
ATOM    584  O   ARG    72      -0.644  30.517  35.483  1.00  0.01
ATOM    585  N   LEU    73      -2.225  29.059  34.826  1.00  0.02
ATOM    587  CA  LEU    73      -2.577  28.673  36.194  1.00  0.01
ATOM    588  CB  LEU    73      -3.825  27.800  36.131  1.00  0.02
ATOM    589  CG  LEU    73      -4.269  27.336  37.513  1.00  0.02
ATOM    590  CD1 LEU    73      -4.618  28.525  38.403  1.00  0.26
ATOM    591  CD2 LEU    73      -5.455  26.383  37.405  1.00  0.43
ATOM    592  C   LEU    73      -1.443  27.888  36.850  1.00  0.01
ATOM    593  O   LEU    73      -1.053  28.204  37.983  1.00  0.02
ATOM    594  N   CYS    74      -0.757  27.079  36.059  1.00  0.02
ATOM    596  CA  CYS    74       0.390  26.327  36.571  1.00  0.01
ATOM    597  CB  CYS    74       0.756  25.260  35.548  1.00  0.02
ATOM    598  SG  CYS    74      -0.526  24.029  35.234  1.00  0.02
ATOM    599  C   CYS    74       1.592  27.235  36.809  1.00  0.00
ATOM    600  O   CYS    74       2.234  27.133  37.863  1.00  0.01
ATOM    601  N   ALA    75       1.705  28.276  36.000  1.00  0.01
ATOM    603  CA  ALA    75       2.786  29.245  36.165  1.00  0.01
ATOM    604  CB  ALA    75       2.934  30.027  34.865  1.00  0.01
ATOM    605  C   ALA    75       2.523  30.207  37.316  1.00  0.00
ATOM    606  O   ALA    75       3.477  30.601  37.995  1.00  0.01
ATOM    607  N   ALA    76       1.263  30.406  37.663  1.00  0.02
ATOM    609  CA  ALA    76       0.928  31.242  38.815  1.00  0.02
ATOM    610  CB  ALA    76      -0.527  31.680  38.696  1.00  0.01
ATOM    611  C   ALA    76       1.119  30.478  40.118  1.00  0.01
ATOM    612  O   ALA    76       1.686  31.033  41.066  1.00  0.01
ATOM    613  N   GLU    77       0.919  29.170  40.073  1.00  0.02
ATOM    615  CA  GLU    77       1.139  28.360  41.274  1.00  0.01
ATOM    616  CB  GLU    77       0.453  27.009  41.113  1.00  0.01
ATOM    617  CG  GLU    77      -1.049  27.141  40.890  1.00  0.02
ATOM    618  CD  GLU    77      -1.712  27.889  42.043  1.00  1.28
ATOM    619  OE1 GLU    77      -1.797  27.313  43.118  1.00  2.15
ATOM    620  OE2 GLU    77      -2.229  28.968  41.787  1.00  1.64
ATOM    621  C   GLU    77       2.629  28.140  41.510  1.00  0.02
ATOM    622  O   GLU    77       3.106  28.322  42.640  1.00  0.02
ATOM    623  N   TYR    78       3.376  28.003  40.425  1.00  0.03
ATOM    625  CA  TYR    78       4.822  27.837  40.548  1.00  0.02
ATOM    626  CB  TYR    78       5.405  27.354  39.227  1.00  0.02
ATOM    627  CG  TYR    78       6.929  27.273  39.256  1.00  0.02
ATOM    628  CD1 TYR    78       7.562  26.485  40.210  1.00  0.02
ATOM    629  CE1 TYR    78       8.949  26.421  40.248  1.00  0.02
ATOM    630  CZ  TYR    78       9.698  27.144  39.330  1.00  0.02
ATOM    631  OH  TYR    78      11.068  27.010  39.310  1.00  0.02
ATOM    632  CE2 TYR    78       9.069  27.936  38.379  1.00  0.01
ATOM    633  CD2 TYR    78       7.682  28.001  38.343  1.00  0.02
ATOM    634  C   TYR    78       5.502  29.140  40.945  1.00  0.01
ATOM    635  O   TYR    78       6.297  29.121  41.891  1.00  0.02
ATOM    636  N   ALA    79       5.021  30.264  40.438  1.00  0.01
ATOM    638  CA  ALA    79       5.623  31.552  40.793  1.00  0.00
ATOM    639  CB  ALA    79       5.197  32.601  39.775  1.00  0.02
ATOM    640  C   ALA    79       5.219  32.007  42.188  1.00  0.01
ATOM    641  O   ALA    79       6.031  32.636  42.876  1.00  0.02
ATOM    642  N   SER    80       4.094  31.515  42.678  1.00  0.02
ATOM    644  CA  SER    80       3.711  31.798  44.058  1.00  0.02
ATOM    645  CB  SER    80       2.279  31.341  44.291  1.00  0.03
ATOM    646  OG  SER    80       2.007  31.532  45.671  1.00  0.02
ATOM    647  C   SER    80       4.625  31.068  45.025  1.00  0.02
ATOM    648  O   SER    80       5.332  31.734  45.789  1.00  0.02
ATOM    649  N   HIS    81       4.848  29.785  44.783  1.00  0.01
ATOM    651  CA  HIS    81       5.696  29.005  45.695  1.00  0.02
ATOM    652  CB  HIS    81       5.546  27.531  45.351  1.00  0.02
ATOM    653  CG  HIS    81       6.305  26.625  46.301  1.00  0.02
ATOM    654  ND1 HIS    81       7.194  25.665  45.975  1.00  1.09
ATOM    656  CE1 HIS    81       7.650  25.083  47.103  1.00  0.74
ATOM    657  NE2 HIS    81       7.049  25.690  48.149  1.00  0.59
ATOM    658  CD2 HIS    81       6.218  26.644  47.672  1.00  1.07
ATOM    659  C   HIS    81       7.168  29.393  45.573  1.00  0.03
ATOM    660  O   HIS    81       7.843  29.567  46.596  1.00  0.02
ATOM    661  N   LEU    82       7.544  29.809  44.377  1.00  0.02
ATOM    663  CA  LEU    82       8.906  30.253  44.090  1.00  0.01
ATOM    664  CB  LEU    82       8.952  30.561  42.598  1.00  0.03
ATOM    665  CG  LEU    82      10.363  30.728  42.058  1.00  0.02
ATOM    666  CD1 LEU    82      11.156  29.441  42.247  1.00  0.03
ATOM    667  CD2 LEU    82      10.313  31.104  40.583  1.00  0.01
ATOM    668  C   LEU    82       9.248  31.510  44.883  1.00  0.02
ATOM    669  O   LEU    82      10.150  31.458  45.729  1.00  0.02
ATOM    670  N   HIS    83       8.355  32.486  44.857  1.00  0.02
ATOM    672  CA  HIS    83       8.615  33.756  45.546  1.00  0.02
ATOM    673  CB  HIS    83       7.933  34.884  44.786  1.00  0.02
ATOM    674  CG  HIS    83       8.529  35.101  43.409  1.00  0.03
ATOM    675  ND1 HIS    83       8.047  34.640  42.239  1.00  0.02
ATOM    677  CE1 HIS    83       8.852  35.033  41.234  1.00  0.02
ATOM    678  NE2 HIS    83       9.855  35.757  41.779  1.00  0.03
ATOM    679  CD2 HIS    83       9.671  35.809  43.118  1.00  0.02
ATOM    680  C   HIS    83       8.195  33.746  47.015  1.00  0.01
ATOM    681  O   HIS    83       8.552  34.660  47.766  1.00  0.03
ATOM    682  N   ASN    84       7.577  32.665  47.459  1.00  0.03
ATOM    684  CA  ASN    84       7.388  32.476  48.897  1.00  0.02
ATOM    685  CB  ASN    84       6.283  31.456  49.147  1.00  0.01
ATOM    686  CG  ASN    84       4.902  31.984  48.771  1.00  0.11
ATOM    687  OD1 ASN    84       4.685  33.189  48.602  1.00  0.93
ATOM    688  ND2 ASN    84       3.956  31.062  48.718  1.00  0.88
ATOM    691  C   ASN    84       8.670  31.946  49.534  1.00  0.02
ATOM    692  O   ASN    84       8.981  32.298  50.678  1.00  0.03
ATOM    693  N   VAL    85       9.475  31.242  48.753  1.00  0.02
ATOM    695  CA  VAL    85      10.730  30.699  49.278  1.00  0.02
ATOM    696  CB  VAL    85      10.963  29.349  48.608  1.00  0.02
ATOM    697  CG1 VAL    85      12.263  28.705  49.080  1.00  0.01
ATOM    698  CG2 VAL    85       9.782  28.422  48.866  1.00  0.03
ATOM    699  C   VAL    85      11.912  31.626  49.002  1.00  0.02
ATOM    700  O   VAL    85      12.811  31.766  49.840  1.00  0.02
ATOM    701  N   LEU    86      11.850  32.337  47.889  1.00  0.02
ATOM    703  CA  LEU    86      12.928  33.264  47.523  1.00  0.02
ATOM    704  CB  LEU    86      13.062  33.276  46.006  1.00  0.02
ATOM    705  CG  LEU    86      13.347  31.893  45.436  1.00  0.02
ATOM    706  CD1 LEU    86      13.314  31.934  43.917  1.00  0.02
ATOM    707  CD2 LEU    86      14.680  31.346  45.927  1.00  0.01
ATOM    708  C   LEU    86      12.654  34.695  47.977  1.00  0.02
ATOM    709  O   LEU    86      13.490  35.583  47.764  1.00  0.02
ATOM    710  N   GLY    87      11.483  34.922  48.546  1.00  0.03
ATOM    712  CA  GLY    87      11.067  36.277  48.898  1.00  0.01
ATOM    713  C   GLY    87      10.551  37.006  47.659  1.00  0.01
ATOM    714  O   GLY    87      11.026  36.788  46.536  1.00  0.02
ATOM    715  N   LYS    88       9.627  37.925  47.882  1.00  0.02
ATOM    717  CA  LYS    88       9.101  38.776  46.802  1.00  0.03
ATOM    718  CB  LYS    88       7.684  39.190  47.176  1.00  0.00
ATOM    719  CG  LYS    88       7.643  39.761  48.589  1.00  1.13
ATOM    720  CD  LYS    88       6.249  40.244  48.952  1.00  1.24
ATOM    721  CE  LYS    88       6.226  40.837  50.356  1.00  2.64
ATOM    722  NZ  LYS    88       4.875  41.299  50.705  1.00  2.83
ATOM    723  C   LYS    88       9.978  40.015  46.590  1.00  0.03
ATOM    724  O   LYS    88       9.507  41.159  46.636  1.00  0.02
ATOM    725  N   THR    89      11.237  39.762  46.278  1.00  0.02
ATOM    727  CA  THR    89      12.243  40.818  46.190  1.00  0.02
ATOM    728  CB  THR    89      13.174  40.698  47.396  1.00  0.02
ATOM    729  OG1 THR    89      13.622  39.350  47.459  1.00  1.17
ATOM    730  CG2 THR    89      12.469  41.020  48.709  1.00  1.21
ATOM    731  C   THR    89      13.081  40.708  44.925  1.00  0.03
ATOM    732  O   THR    89      14.314  40.729  45.006  1.00  0.03
ATOM    733  N   GLY    90      12.436  40.715  43.770  1.00  0.01
ATOM    735  CA  GLY    90      13.171  40.692  42.491  1.00  0.03
ATOM    736  C   GLY    90      13.530  42.102  42.008  1.00  0.02
ATOM    737  O   GLY    90      13.341  42.438  40.832  1.00  0.02
ATOM    738  N   ALA    91      14.197  42.836  42.883  1.00  0.02
ATOM    740  CA  ALA    91      14.520  44.246  42.673  1.00  0.02
ATOM    741  CB  ALA    91      15.040  44.807  43.995  1.00  0.02
ATOM    742  C   ALA    91      15.550  44.467  41.575  1.00  0.03
ATOM    743  O   ALA    91      16.427  43.626  41.323  1.00  0.02
ATOM    744  N   PRO    92      15.365  45.580  40.880  1.00  0.02
ATOM    745  CA  PRO    92      16.356  46.069  39.925  1.00  0.01
ATOM    746  CB  PRO    92      15.759  47.302  39.321  1.00  0.03
ATOM    747  CG  PRO    92      14.439  47.606  40.010  1.00  0.02
ATOM    748  CD  PRO    92      14.231  46.497  41.027  1.00  0.03
ATOM    749  C   PRO    92      17.697  46.366  40.591  1.00  0.02
ATOM    750  O   PRO    92      17.843  47.282  41.410  1.00  0.03
ATOM    751  N   LEU    93      18.664  45.562  40.194  1.00  0.02
ATOM    753  CA  LEU    93      20.058  45.655  40.628  1.00  0.03
ATOM    754  CB  LEU    93      20.741  44.447  39.991  1.00  0.03
ATOM    755  CG  LEU    93      22.003  43.999  40.708  1.00  0.03
ATOM    756  CD1 LEU    93      21.683  43.612  42.144  1.00  0.03
ATOM    757  CD2 LEU    93      22.634  42.822  39.975  1.00  0.02
ATOM    758  C   LEU    93      20.690  46.956  40.122  1.00  0.02
ATOM    759  O   LEU    93      20.309  47.466  39.062  1.00  0.02
ATOM    760  N   THR    94      21.599  47.521  40.901  1.00  0.03
ATOM    762  CA  THR    94      22.265  48.771  40.490  1.00  0.02
ATOM    763  CB  THR    94      23.117  49.323  41.624  1.00  0.01
ATOM    764  OG1 THR    94      24.295  48.528  41.718  1.00  0.12
ATOM    765  CG2 THR    94      22.379  49.334  42.958  1.00  0.12
ATOM    766  C   THR    94      23.205  48.531  39.322  1.00  0.03
ATOM    767  O   THR    94      23.651  47.397  39.106  1.00  0.03
ATOM    768  N   ASN    95      23.675  49.627  38.746  1.00  0.02
ATOM    770  CA  ASN    95      24.631  49.567  37.631  1.00  0.02
ATOM    771  CB  ASN    95      24.996  50.995  37.220  1.00  0.02
ATOM    772  CG  ASN    95      25.602  51.028  35.815  1.00  1.14
ATOM    773  OD1 ASN    95      24.909  51.373  34.852  1.00  1.61
ATOM    774  ND2 ASN    95      26.891  50.755  35.708  1.00  1.86
ATOM    777  C   ASN    95      25.897  48.842  38.064  1.00  0.03
ATOM    778  O   ASN    95      26.213  47.783  37.510  1.00  0.02
ATOM    779  N   VAL    96      26.422  49.243  39.212  1.00  0.01
ATOM    781  CA  VAL    96      27.665  48.664  39.720  1.00  0.01
ATOM    782  CB  VAL    96      28.071  49.428  40.973  1.00  0.03
ATOM    783  CG1 VAL    96      29.401  48.913  41.514  1.00  0.07
ATOM    784  CG2 VAL    96      28.160  50.922  40.683  1.00  0.07
ATOM    785  C   VAL    96      27.531  47.175  40.034  1.00  0.03
ATOM    786  O   VAL    96      28.327  46.394  39.500  1.00  0.02
ATOM    787  N   GLU    97      26.421  46.745  40.617  1.00  0.01
ATOM    789  CA  GLU    97      26.266  45.314  40.910  1.00  0.03
ATOM    790  CB  GLU    97      25.158  45.170  41.936  1.00  0.02
ATOM    791  CG  GLU    97      25.485  45.876  43.242  1.00  0.01
ATOM    792  CD  GLU    97      24.183  46.063  44.009  1.00  0.03
ATOM    793  OE1 GLU    97      23.184  46.299  43.337  1.00  0.02
ATOM    794  OE2 GLU    97      24.236  46.155  45.225  1.00  0.03
ATOM    795  C   GLU    97      25.903  44.468  39.686  1.00  0.03
ATOM    796  O   GLU    97      26.182  43.264  39.687  1.00  0.02
ATOM    797  N   ALA    98      25.440  45.099  38.618  1.00  0.03
ATOM    799  CA  ALA    98      25.131  44.381  37.381  1.00  0.02
ATOM    800  CB  ALA    98      24.001  45.102  36.654  1.00  0.02
ATOM    801  C   ALA    98      26.344  44.264  36.459  1.00  0.02
ATOM    802  O   ALA    98      26.249  43.644  35.395  1.00  0.03
ATOM    803  N   VAL    99      27.449  44.901  36.809  1.00  0.02
ATOM    805  CA  VAL    99      28.676  44.663  36.042  1.00  0.02
ATOM    806  CB  VAL    99      29.145  45.975  35.416  1.00  0.03
ATOM    807  CG1 VAL    99      28.884  47.187  36.295  1.00  0.02
ATOM    808  CG2 VAL    99      30.609  45.920  35.007  1.00  0.01
ATOM    809  C   VAL    99      29.781  44.027  36.887  1.00  0.02
ATOM    810  O   VAL    99      30.460  43.096  36.428  1.00  0.03
ATOM    811  N   LEU   100      29.824  44.399  38.154  1.00  0.03
ATOM    813  CA  LEU   100      30.890  43.952  39.051  1.00  0.02
ATOM    814  CB  LEU   100      31.222  45.154  39.940  1.00  0.02
ATOM    815  CG  LEU   100      32.586  45.091  40.628  1.00  0.02
ATOM    816  CD1 LEU   100      32.566  44.356  41.965  1.00  0.59
ATOM    817  CD2 LEU   100      33.662  44.556  39.689  1.00  0.69
ATOM    818  C   LEU   100      30.442  42.743  39.875  1.00  0.03
ATOM    819  O   LEU   100      31.277  42.002  40.407  1.00  0.03
ATOM    820  N   GLY   101      29.148  42.485  39.883  1.00  0.03
ATOM    822  CA  GLY   101      28.631  41.315  40.588  1.00  0.03
ATOM    823  C   GLY   101      28.043  41.640  41.957  1.00  0.02
ATOM    824  O   GLY   101      28.626  42.385  42.756  1.00  0.03
ATOM    825  N   ILE   102      26.877  41.074  42.206  1.00  0.02
ATOM    827  CA  ILE   102      26.242  41.139  43.531  1.00  0.03
ATOM    828  CB  ILE   102      24.780  41.586  43.354  1.00  0.02
ATOM    829  CG2 ILE   102      23.943  40.481  42.725  1.00  0.03
ATOM    830  CG1 ILE   102      24.117  42.059  44.651  1.00  0.02
ATOM    831  CD1 ILE   102      22.943  41.163  45.053  1.00  0.84
ATOM    832  C   ILE   102      26.367  39.740  44.155  1.00  0.02
ATOM    833  O   ILE   102      26.797  38.802  43.472  1.00  0.02
ATOM    834  N   ASP   103      26.152  39.624  45.456  1.00  0.02
ATOM    836  CA  ASP   103      26.151  38.303  46.097  1.00  0.03
ATOM    837  CB  ASP   103      25.843  38.478  47.581  1.00  0.03
ATOM    838  CG  ASP   103      25.969  37.142  48.307  1.00  0.03
ATOM    839  OD1 ASP   103      26.837  36.372  47.918  1.00  0.03
ATOM    840  OD2 ASP   103      25.237  36.939  49.264  1.00  0.03
ATOM    841  C   ASP   103      25.090  37.415  45.445  1.00  0.03
ATOM    842  O   ASP   103      23.908  37.770  45.400  1.00  0.02
ATOM    843  N   GLY   104      25.547  36.329  44.842  1.00  0.02
ATOM    845  CA  GLY   104      24.651  35.410  44.132  1.00  0.01
ATOM    846  C   GLY   104      24.550  35.716  42.633  1.00  0.02
ATOM    847  O   GLY   104      23.641  35.218  41.959  1.00  0.02
ATOM    848  N   LEU   105      25.425  36.573  42.133  1.00  0.01
ATOM    850  CA  LEU   105      25.435  36.912  40.702  1.00  0.01
ATOM    851  CB  LEU   105      24.272  37.854  40.403  1.00  0.03
ATOM    852  CG  LEU   105      24.092  38.095  38.909  1.00  0.02
ATOM    853  CD1 LEU   105      23.832  36.784  38.175  1.00  0.02
ATOM    854  CD2 LEU   105      22.960  39.083  38.655  1.00  0.02
ATOM    855  C   LEU   105      26.762  37.577  40.340  1.00  0.03
ATOM    856  O   LEU   105      26.868  38.809  40.320  1.00  0.02
ATOM    857  N   ASP   106      27.697  36.746  39.907  1.00  0.02
ATOM    859  CA  ASP   106      29.100  37.140  39.671  1.00  0.01
ATOM    860  CB  ASP   106      29.888  35.890  39.292  1.00  0.03
ATOM    861  CG  ASP   106      29.831  34.860  40.417  1.00  0.02
ATOM    862  OD1 ASP   106      29.842  35.275  41.569  1.00  0.01
ATOM    863  OD2 ASP   106      29.734  33.682  40.107  1.00  0.02
ATOM    864  C   ASP   106      29.279  38.180  38.568  1.00  0.02
ATOM    865  O   ASP   106      28.365  38.435  37.778  1.00  0.03
ATOM    866  N   ALA   107      30.449  38.800  38.570  1.00  0.01
ATOM    868  CA  ALA   107      30.818  39.820  37.576  1.00  0.02
ATOM    869  CB  ALA   107      32.229  40.306  37.886  1.00  0.02
ATOM    870  C   ALA   107      30.782  39.315  36.137  1.00  0.01
ATOM    871  O   ALA   107      30.829  38.108  35.867  1.00  0.02
ATOM    872  N   MET   108      30.656  40.263  35.225  1.00  0.02
ATOM    874  CA  MET   108      30.621  39.942  33.794  1.00  0.02
ATOM    875  CB  MET   108      29.968  41.094  33.047  1.00  0.03
ATOM    876  CG  MET   108      28.636  41.455  33.683  1.00  0.02
ATOM    877  SD  MET   108      27.606  42.571  32.713  1.00  0.02
ATOM    878  CE  MET   108      27.260  41.465  31.327  1.00  0.02
ATOM    879  C   MET   108      32.024  39.705  33.244  1.00  0.02
ATOM    880  O   MET   108      33.024  40.096  33.855  1.00  0.02
ATOM    881  N   GLU   109      32.088  39.019  32.114  1.00  0.02
ATOM    883  CA  GLU   109      33.381  38.742  31.467  1.00  0.02
ATOM    884  CB  GLU   109      33.287  37.436  30.689  1.00  0.03
ATOM    885  CG  GLU   109      33.134  36.245  31.629  1.00  0.03
ATOM    886  CD  GLU   109      34.364  36.114  32.528  1.00  0.02
ATOM    887  OE1 GLU   109      35.448  36.433  32.059  1.00  0.02
ATOM    888  OE2 GLU   109      34.204  35.643  33.644  1.00  0.03
ATOM    889  C   GLU   109      33.802  39.879  30.542  1.00  0.02
ATOM    890  O   GLU   109      33.419  39.910  29.366  1.00  0.02
ATOM    891  N   PRO   110      34.828  40.583  30.991  1.00  0.03
ATOM    892  CA  PRO   110      35.012  41.996  30.632  1.00  0.02
ATOM    893  CB  PRO   110      35.908  42.542  31.702  1.00  0.03
ATOM    894  CG  PRO   110      36.398  41.416  32.595  1.00  0.02
ATOM    895  CD  PRO   110      35.669  40.175  32.122  1.00  0.02
ATOM    896  C   PRO   110      35.633  42.268  29.258  1.00  0.02
ATOM    897  O   PRO   110      35.663  43.421  28.819  1.00  0.03
ATOM    898  N   ASN   111      36.086  41.240  28.563  1.00  0.02
ATOM    900  CA  ASN   111      36.759  41.483  27.288  1.00  0.03
ATOM    901  CB  ASN   111      38.131  40.823  27.345  1.00  0.02
ATOM    902  CG  ASN   111      39.008  41.373  26.228  1.00  0.02
ATOM    903  OD1 ASN   111      38.790  42.495  25.759  1.00  0.02
ATOM    904  ND2 ASN   111      40.023  40.610  25.860  1.00  1.27
ATOM    907  C   ASN   111      35.974  40.934  26.101  1.00  0.02
ATOM    908  O   ASN   111      36.151  41.421  24.977  1.00  0.02
ATOM    909  N   THR   112      34.978  40.112  26.392  1.00  0.02
ATOM    911  CA  THR   112      34.274  39.357  25.340  1.00  0.02
ATOM    912  CB  THR   112      33.395  38.289  25.982  1.00  0.02
ATOM    913  OG1 THR   112      32.446  38.926  26.819  1.00  0.02
ATOM    914  CG2 THR   112      34.213  37.329  26.837  1.00  0.03
ATOM    915  C   THR   112      33.438  40.239  24.413  1.00  0.02
ATOM    916  O   THR   112      33.406  41.467  24.543  1.00  0.03
ATOM    917  N   ALA   113      32.893  39.602  23.390  1.00  0.02
ATOM    919  CA  ALA   113      32.092  40.310  22.384  1.00  0.02
ATOM    920  CB  ALA   113      31.834  39.365  21.214  1.00  0.02
ATOM    921  C   ALA   113      30.762  40.790  22.952  1.00  0.02
ATOM    922  O   ALA   113      29.901  39.983  23.320  1.00  0.02
ATOM    923  N   PRO   114      30.560  42.096  22.884  1.00  0.02
ATOM    924  CA  PRO   114      29.385  42.774  23.461  1.00  0.02
ATOM    925  CB  PRO   114      29.827  44.189  23.641  1.00  0.03
ATOM    926  CG  PRO   114      31.106  44.407  22.855  1.00  0.02
ATOM    927  CD  PRO   114      31.504  43.050  22.304  1.00  0.02
ATOM    928  C   PRO   114      28.124  42.743  22.589  1.00  0.02
ATOM    929  O   PRO   114      27.307  43.670  22.669  1.00  0.01
ATOM    930  N   GLY   115      27.997  41.746  21.731  1.00  0.02
ATOM    932  CA  GLY   115      26.862  41.665  20.812  1.00  0.03
ATOM    933  C   GLY   115      26.873  42.771  19.765  1.00  0.02
ATOM    934  O   GLY   115      27.861  43.496  19.578  1.00  0.02
ATOM    935  N   LEU   116      25.744  42.898  19.099  1.00  0.02
ATOM    937  CA  LEU   116      25.601  43.904  18.048  1.00  0.02
ATOM    938  CB  LEU   116      24.605  43.370  17.031  1.00  0.01
ATOM    939  CG  LEU   116      25.135  42.088  16.406  1.00  0.02
ATOM    940  CD1 LEU   116      24.114  41.502  15.448  1.00  0.02
ATOM    941  CD2 LEU   116      26.460  42.330  15.693  1.00  0.01
ATOM    942  C   LEU   116      25.126  45.240  18.614  1.00  0.02
ATOM    943  O   LEU   116      24.469  45.277  19.658  1.00  0.02
ATOM    944  N   PRO   117      25.485  46.327  17.947  1.00  0.02
ATOM    945  CA  PRO   117      26.395  46.328  16.786  1.00  0.02
ATOM    946  CB  PRO   117      25.990  47.557  16.035  1.00  0.02
ATOM    947  CG  PRO   117      25.238  48.481  16.986  1.00  0.03
ATOM    948  CD  PRO   117      25.024  47.681  18.261  1.00  0.02
ATOM    949  C   PRO   117      27.895  46.420  17.117  1.00  0.02
ATOM    950  O   PRO   117      28.713  46.408  16.186  1.00  0.03
ATOM    951  N   TRP   118      28.258  46.320  18.386  1.00  0.02
ATOM    953  CA  TRP   118      29.586  46.732  18.855  1.00  0.02
ATOM    954  CB  TRP   118      29.546  46.671  20.374  1.00  0.01
ATOM    955  CG  TRP   118      28.263  47.244  20.938  1.00  0.02
ATOM    956  CD1 TRP   118      27.253  46.542  21.558  1.00  0.02
ATOM    957  NE1 TRP   118      26.262  47.407  21.876  1.00  0.03
ATOM    959  CE2 TRP   118      26.577  48.666  21.510  1.00  0.01
ATOM    960  CZ2 TRP   118      25.889  49.867  21.579  1.00  0.03
ATOM    961  CH2 TRP   118      26.485  51.032  21.111  1.00  0.02
ATOM    962  CZ3 TRP   118      27.764  50.997  20.566  1.00  0.01
ATOM    963  CE3 TRP   118      28.452  49.795  20.477  1.00  0.02
ATOM    964  CD2 TRP   118      27.861  48.630  20.941  1.00  0.03
ATOM    965  C   TRP   118      30.718  45.854  18.345  1.00  0.02
ATOM    966  O   TRP   118      31.727  46.399  17.869  1.00  0.01
ATOM    967  N   ALA   119      30.427  44.578  18.146  1.00  0.02
ATOM    969  CA  ALA   119      31.438  43.660  17.610  1.00  0.02
ATOM    970  CB  ALA   119      31.082  42.243  18.033  1.00  0.02
ATOM    971  C   ALA   119      31.607  43.729  16.087  1.00  0.01
ATOM    972  O   ALA   119      32.625  43.254  15.574  1.00  0.02
ATOM    973  N   LEU   120      30.707  44.412  15.393  1.00  0.01
ATOM    975  CA  LEU   120      30.903  44.663  13.958  1.00  0.01
ATOM    976  CB  LEU   120      29.567  44.656  13.224  1.00  0.03
ATOM    977  CG  LEU   120      28.970  43.263  13.108  1.00  0.01
ATOM    978  CD1 LEU   120      27.643  43.337  12.363  1.00  0.01
ATOM    979  CD2 LEU   120      29.935  42.321  12.397  1.00  0.02
ATOM    980  C   LEU   120      31.549  46.024  13.746  1.00  0.02
ATOM    981  O   LEU   120      32.084  46.312  12.670  1.00  0.02
ATOM    982  N   GLN   121      31.490  46.845  14.779  1.00  0.02
ATOM    984  CA  GLN   121      32.156  48.143  14.738  1.00  0.02
ATOM    985  CB  GLN   121      31.529  49.043  15.795  1.00  0.03
ATOM    986  CG  GLN   121      30.043  49.236  15.536  1.00  0.02
ATOM    987  CD  GLN   121      29.419  49.999  16.694  1.00  0.02
ATOM    988  OE1 GLN   121      28.479  49.521  17.340  1.00  0.03
ATOM    989  NE2 GLN   121      29.987  51.158  16.976  1.00  0.01
ATOM    992  C   GLN   121      33.638  47.971  15.032  1.00  0.02
ATOM    993  O   GLN   121      34.460  47.945  14.105  1.00  0.01
ATOM    994  N   HIS   122      33.941  47.787  16.308  1.00  0.02
ATOM    996  CA  HIS   122      35.333  47.691  16.780  1.00  0.03
ATOM    997  CB  HIS   122      36.146  48.904  16.312  1.00  1.04
ATOM    998  CG  HIS   122      35.691  50.258  16.849  1.00  1.88
ATOM    999  ND1 HIS   122      36.154  50.872  17.953  1.00  2.39
ATOM   1001  CE1 HIS   122      35.516  52.051  18.114  1.00  3.04
ATOM   1002  NE2 HIS   122      34.645  52.180  17.089  1.00  3.09
ATOM   1003  CD2 HIS   122      34.745  51.089  16.298  1.00  2.45
ATOM   1004  C   HIS   122      35.360  47.658  18.302  1.00  0.03
ATOM   1005  O   HIS   122      36.423  47.781  18.923  1.00  0.01
ATOM   1006  N   LYS   123      34.184  47.566  18.894  1.00  0.03
ATOM   1008  CA  LYS   123      34.090  47.746  20.334  1.00  0.03
ATOM   1009  CB  LYS   123      32.864  48.589  20.645  1.00  0.02
ATOM   1010  CG  LYS   123      33.020  49.987  20.070  1.00  0.02
ATOM   1011  CD  LYS   123      31.840  50.879  20.433  1.00  0.03
ATOM   1012  CE  LYS   123      32.028  52.292  19.901  1.00  0.02
ATOM   1013  NZ  LYS   123      30.888  53.145  20.270  1.00  0.01
ATOM   1014  C   LYS   123      34.034  46.432  21.097  1.00  0.02
ATOM   1015  O   LYS   123      33.132  45.605  20.924  1.00  0.02
ATOM   1016  N   ARG   124      35.054  46.266  21.919  1.00  0.03
ATOM   1018  CA  ARG   124      35.120  45.194  22.910  1.00  0.03
ATOM   1019  CB  ARG   124      36.584  45.007  23.277  1.00  0.02
ATOM   1020  CG  ARG   124      37.423  44.746  22.034  1.00  0.01
ATOM   1021  CD  ARG   124      38.840  45.297  22.184  1.00  0.02
ATOM   1022  NE  ARG   124      39.550  44.727  23.341  1.00  0.03
ATOM   1023  CZ  ARG   124      40.138  45.484  24.270  1.00  0.03
ATOM   1024  NH1 ARG   124      39.985  46.810  24.244  1.00  0.02
ATOM   1025  NH2 ARG   124      40.811  44.913  25.271  1.00  0.02
ATOM   1026  C   ARG   124      34.354  45.654  24.146  1.00  0.02
ATOM   1027  O   ARG   124      34.030  46.847  24.261  1.00  0.02
ATOM   1028  N   ARG   125      34.202  44.780  25.127  1.00  0.02
ATOM   1030  CA  ARG   125      33.502  45.204  26.346  1.00  0.02
ATOM   1031  CB  ARG   125      33.136  43.992  27.190  1.00  0.02
ATOM   1032  CG  ARG   125      31.987  43.221  26.571  1.00  0.02
ATOM   1033  CD  ARG   125      31.568  42.051  27.446  1.00  0.02
ATOM   1034  NE  ARG   125      30.445  41.332  26.831  1.00  0.02
ATOM   1035  CZ  ARG   125      29.688  40.458  27.497  1.00  0.02
ATOM   1036  NH1 ARG   125      29.917  40.229  28.791  1.00  0.02
ATOM   1037  NH2 ARG   125      28.684  39.836  26.875  1.00  0.01
ATOM   1038  C   ARG   125      34.314  46.197  27.179  1.00  0.02
ATOM   1039  O   ARG   125      33.711  47.155  27.679  1.00  0.03
ATOM   1040  N   HIS   126      35.626  46.208  26.992  1.00  0.03
ATOM   1042  CA  HIS   126      36.488  47.222  27.621  1.00  0.02
ATOM   1043  CB  HIS   126      37.930  46.748  27.530  1.00  0.29
ATOM   1044  CG  HIS   126      38.285  45.637  28.492  1.00  0.75
ATOM   1045  ND1 HIS   126      38.859  44.458  28.186  1.00  1.37
ATOM   1047  CE1 HIS   126      39.040  43.743  29.312  1.00  1.65
ATOM   1048  NE2 HIS   126      38.544  44.471  30.336  1.00  1.78
ATOM   1049  CD2 HIS   126      38.081  45.643  29.849  1.00  1.66
ATOM   1050  C   HIS   126      36.414  48.614  26.976  1.00  0.03
ATOM   1051  O   HIS   126      37.086  49.538  27.443  1.00  0.03
ATOM   1052  N   ASP   127      35.676  48.760  25.886  1.00  0.02
ATOM   1054  CA  ASP   127      35.485  50.083  25.291  1.00  0.02
ATOM   1055  CB  ASP   127      35.622  49.982  23.777  1.00  0.03
ATOM   1056  CG  ASP   127      36.982  49.411  23.400  1.00  0.25
ATOM   1057  OD1 ASP   127      37.980  50.026  23.742  1.00  0.52
ATOM   1058  OD2 ASP   127      36.998  48.337  22.813  1.00  0.46
ATOM   1059  C   ASP   127      34.093  50.613  25.617  1.00  0.03
ATOM   1060  O   ASP   127      33.770  51.760  25.281  1.00  0.04
ATOM   1061  N   LEU   128      33.272  49.763  26.212  1.00  0.02
ATOM   1063  CA  LEU   128      31.883  50.123  26.495  1.00  0.03
ATOM   1064  CB  LEU   128      30.991  49.058  25.880  1.00  0.02
ATOM   1065  CG  LEU   128      31.042  49.092  24.360  1.00  0.02
ATOM   1066  CD1 LEU   128      30.307  47.898  23.780  1.00  0.03
ATOM   1067  CD2 LEU   128      30.459  50.400  23.833  1.00  0.01
ATOM   1068  C   LEU   128      31.604  50.201  27.988  1.00  0.01
ATOM   1069  O   LEU   128      30.650  50.868  28.413  1.00  0.03
ATOM   1070  N   LEU   129      32.379  49.474  28.771  1.00  0.02
ATOM   1072  CA  LEU   129      32.240  49.542  30.227  1.00  0.03
ATOM   1073  CB  LEU   129      31.555  48.292  30.771  1.00  0.03
ATOM   1074  CG  LEU   129      30.045  48.423  30.930  1.00  0.80
ATOM   1075  CD1 LEU   129      29.309  48.151  29.627  1.00  1.89
ATOM   1076  CD2 LEU   129      29.558  47.443  31.983  1.00  1.19
ATOM   1077  C   LEU   129      33.582  49.650  30.931  1.00  0.02
ATOM   1078  O   LEU   129      34.524  48.895  30.656  1.00  0.02
ATOM   1079  N   ASP   130      33.605  50.498  31.942  1.00  0.02
ATOM   1081  CA  ASP   130      34.730  50.502  32.870  1.00  0.03
ATOM   1082  CB  ASP   130      34.989  51.916  33.385  1.00  0.03
ATOM   1083  CG  ASP   130      36.272  51.978  34.220  1.00  0.03
ATOM   1084  OD1 ASP   130      36.445  51.114  35.076  1.00  0.02
ATOM   1085  OD2 ASP   130      36.982  52.960  34.084  1.00  0.04
ATOM   1086  C   ASP   130      34.364  49.551  34.006  1.00  0.01
ATOM   1087  O   ASP   130      33.824  49.963  35.046  1.00  0.02
ATOM   1088  N   PHE   131      34.881  48.339  33.885  1.00  0.03
ATOM   1090  CA  PHE   131      34.537  47.241  34.798  1.00  0.02
ATOM   1091  CB  PHE   131      34.965  45.926  34.147  1.00  0.03
ATOM   1092  CG  PHE   131      34.172  45.518  32.906  1.00  0.01
ATOM   1093  CD1 PHE   131      33.046  44.720  33.048  1.00  0.03
ATOM   1094  CE1 PHE   131      32.310  44.344  31.932  1.00  0.02
ATOM   1095  CZ  PHE   131      32.710  44.757  30.669  1.00  0.02
ATOM   1096  CE2 PHE   131      33.850  45.536  30.523  1.00  0.02
ATOM   1097  CD2 PHE   131      34.585  45.911  31.639  1.00  0.04
ATOM   1098  C   PHE   131      35.191  47.334  36.176  1.00  0.03
ATOM   1099  O   PHE   131      34.620  46.814  37.139  1.00  0.03
ATOM   1100  N   THR   132      36.192  48.187  36.321  1.00  0.02
ATOM   1102  CA  THR   132      36.880  48.306  37.608  1.00  0.02
ATOM   1103  CB  THR   132      38.296  48.801  37.329  1.00  0.03
ATOM   1104  OG1 THR   132      38.894  47.910  36.396  1.00  0.19
ATOM   1105  CG2 THR   132      39.158  48.823  38.587  1.00  0.24
ATOM   1106  C   THR   132      36.156  49.295  38.520  1.00  0.02
ATOM   1107  O   THR   132      36.231  49.201  39.750  1.00  0.02
ATOM   1108  N   THR   133      35.379  50.169  37.904  1.00  0.03
ATOM   1110  CA  THR   133      34.595  51.146  38.662  1.00  0.00
ATOM   1111  CB  THR   133      34.800  52.521  38.041  1.00  0.02
ATOM   1112  OG1 THR   133      34.373  52.447  36.688  1.00  0.70
ATOM   1113  CG2 THR   133      36.266  52.938  38.055  1.00  0.76
ATOM   1114  C   THR   133      33.106  50.807  38.654  1.00  0.03
ATOM   1115  O   THR   133      32.306  51.502  39.290  1.00  0.03
ATOM   1116  N   GLY   134      32.739  49.818  37.854  1.00  0.02
ATOM   1118  CA  GLY   134      31.340  49.388  37.750  1.00  0.03
ATOM   1119  C   GLY   134      30.461  50.420  37.043  1.00  0.01
ATOM   1120  O   GLY   134      29.288  50.596  37.404  1.00  0.02
ATOM   1121  N   GLU   135      31.013  51.091  36.043  1.00  0.04
ATOM   1123  CA  GLU   135      30.244  52.138  35.348  1.00  0.02
ATOM   1124  CB  GLU   135      30.812  53.517  35.686  1.00  0.04
ATOM   1125  CG  GLU   135      32.147  53.775  34.999  1.00  0.92
ATOM   1126  CD  GLU   135      32.718  55.132  35.398  1.00  1.39
ATOM   1127  OE1 GLU   135      33.826  55.136  35.915  1.00  2.00
ATOM   1128  OE2 GLU   135      32.123  56.131  35.024  1.00  1.63
ATOM   1129  C   GLU   135      30.226  51.930  33.834  1.00  0.02
ATOM   1130  O   GLU   135      31.219  51.505  33.228  1.00  0.03
ATOM   1131  N   MET   136      29.083  52.217  33.237  1.00  0.03
ATOM   1133  CA  MET   136      28.930  52.068  31.786  1.00  0.02
ATOM   1134  CB  MET   136      27.497  51.657  31.488  1.00  0.01
ATOM   1135  CG  MET   136      27.163  50.364  32.217  1.00  0.89
ATOM   1136  SD  MET   136      25.495  49.727  31.962  1.00  1.04
ATOM   1137  CE  MET   136      25.595  49.412  30.188  1.00  2.10
ATOM   1138  C   MET   136      29.262  53.363  31.054  1.00  0.03
ATOM   1139  O   MET   136      29.053  54.464  31.575  1.00  0.03
ATOM   1140  N   GLN   137      29.847  53.213  29.881  1.00  0.02
ATOM   1142  CA  GLN   137      30.183  54.360  29.035  1.00  0.02
ATOM   1143  CB  GLN   137      31.399  53.955  28.201  1.00  0.62
ATOM   1144  CG  GLN   137      32.582  53.741  29.144  1.00  0.85
ATOM   1145  CD  GLN   137      33.775  53.111  28.435  1.00  1.14
ATOM   1146  OE1 GLN   137      34.148  51.971  28.738  1.00  0.68
ATOM   1147  NE2 GLN   137      34.376  53.862  27.530  1.00  2.18
ATOM   1150  C   GLN   137      28.960  54.776  28.207  1.00  0.01
ATOM   1151  O   GLN   137      28.098  53.942  27.899  1.00  0.03
ATOM   1152  N   PRO   138      28.913  56.044  27.811  1.00  0.02
ATOM   1153  CA  PRO   138      27.625  56.733  27.573  1.00  0.01
ATOM   1154  CB  PRO   138      27.973  58.181  27.407  1.00  0.02
ATOM   1155  CG  PRO   138      29.469  58.370  27.584  1.00  0.03
ATOM   1156  CD  PRO   138      30.022  56.999  27.924  1.00  0.02
ATOM   1157  C   PRO   138      26.796  56.260  26.370  1.00  0.03
ATOM   1158  O   PRO   138      25.569  56.417  26.410  1.00  0.02
ATOM   1159  N   ALA   139      27.369  55.478  25.468  1.00  0.01
ATOM   1161  CA  ALA   139      26.587  54.957  24.342  1.00  0.02
ATOM   1162  CB  ALA   139      27.541  54.365  23.312  1.00  0.01
ATOM   1163  C   ALA   139      25.601  53.884  24.804  1.00  0.01
ATOM   1164  O   ALA   139      24.415  53.964  24.458  1.00  0.02
ATOM   1165  N   LEU   140      25.983  53.167  25.849  1.00  0.03
ATOM   1167  CA  LEU   140      25.092  52.150  26.406  1.00  0.01
ATOM   1168  CB  LEU   140      25.924  51.080  27.092  1.00  0.02
ATOM   1169  CG  LEU   140      26.789  50.318  26.100  1.00  0.68
ATOM   1170  CD1 LEU   140      27.581  49.234  26.813  1.00  0.62
ATOM   1171  CD2 LEU   140      25.933  49.691  25.011  1.00  1.26
ATOM   1172  C   LEU   140      24.098  52.748  27.398  1.00  0.03
ATOM   1173  O   LEU   140      23.022  52.175  27.594  1.00  0.02
ATOM   1174  N   ALA   141      24.338  53.981  27.816  1.00  0.03
ATOM   1176  CA  ALA   141      23.377  54.686  28.667  1.00  0.03
ATOM   1177  CB  ALA   141      24.119  55.739  29.482  1.00  0.03
ATOM   1178  C   ALA   141      22.300  55.349  27.809  1.00  0.03
ATOM   1179  O   ALA   141      21.132  55.409  28.213  1.00  0.03
ATOM   1180  N   GLU   142      22.635  55.580  26.549  1.00  0.03
ATOM   1182  CA  GLU   142      21.652  56.079  25.583  1.00  0.03
ATOM   1183  CB  GLU   142      22.404  56.597  24.365  1.00  0.02
ATOM   1184  CG  GLU   142      23.337  57.736  24.753  1.00  1.07
ATOM   1185  CD  GLU   142      24.316  58.029  23.621  1.00  1.08
ATOM   1186  OE1 GLU   142      23.927  57.867  22.473  1.00  1.29
ATOM   1187  OE2 GLU   142      25.462  58.338  23.925  1.00  1.10
ATOM   1188  C   GLU   142      20.728  54.939  25.173  1.00  0.02
ATOM   1189  O   GLU   142      19.502  55.083  25.286  1.00  0.02
ATOM   1190  N   ARG   143      21.313  53.753  25.096  1.00  0.02
ATOM   1192  CA  ARG   143      20.544  52.535  24.824  1.00  0.02
ATOM   1193  CB  ARG   143      21.503  51.420  24.437  1.00  0.03
ATOM   1194  CG  ARG   143      21.697  51.244  22.934  1.00  0.48
ATOM   1195  CD  ARG   143      22.420  52.385  22.229  1.00  0.84
ATOM   1196  NE  ARG   143      23.007  51.913  20.964  1.00  1.21
ATOM   1197  CZ  ARG   143      22.396  51.902  19.777  1.00  1.34
ATOM   1198  NH1 ARG   143      23.007  51.357  18.724  1.00  1.53
ATOM   1199  NH2 ARG   143      21.153  52.370  19.654  1.00  1.86
ATOM   1200  C   ARG   143      19.731  52.078  26.036  1.00  0.01
ATOM   1201  O   ARG   143      18.647  51.508  25.863  1.00  0.02
ATOM   1202  N   PHE   144      20.126  52.511  27.222  1.00  0.02
ATOM   1204  CA  PHE   144      19.341  52.232  28.427  1.00  0.02
ATOM   1205  CB  PHE   144      20.211  52.403  29.665  1.00  0.02
ATOM   1206  CG  PHE   144      20.915  51.132  30.140  1.00  0.03
ATOM   1207  CD1 PHE   144      21.262  51.011  31.477  1.00  0.03
ATOM   1208  CE1 PHE   144      21.890  49.858  31.927  1.00  1.24
ATOM   1209  CZ  PHE   144      22.172  48.827  31.041  1.00  1.18
ATOM   1210  CE2 PHE   144      21.827  48.953  29.702  1.00  0.59
ATOM   1211  CD2 PHE   144      21.197  50.103  29.252  1.00  0.02
ATOM   1212  C   PHE   144      18.136  53.154  28.529  1.00  0.02
ATOM   1213  O   PHE   144      17.061  52.689  28.927  1.00  0.02
ATOM   1214  N   GLU   145      18.225  54.326  27.919  1.00  0.02
ATOM   1216  CA  GLU   145      17.065  55.218  27.851  1.00  0.01
ATOM   1217  CB  GLU   145      17.539  56.627  27.515  1.00  0.02
ATOM   1218  CG  GLU   145      18.503  57.171  28.565  1.00  0.01
ATOM   1219  CD  GLU   145      17.802  57.411  29.901  1.00  0.02
ATOM   1220  OE1 GLU   145      16.764  58.059  29.871  1.00  0.42
ATOM   1221  OE2 GLU   145      18.462  57.207  30.912  1.00  0.48
ATOM   1222  C   GLU   145      16.095  54.731  26.777  1.00  0.01
ATOM   1223  O   GLU   145      14.873  54.800  26.969  1.00  0.01
ATOM   1224  N   GLN   146      16.628  54.012  25.802  1.00  0.02
ATOM   1226  CA  GLN   146      15.788  53.381  24.784  1.00  0.02
ATOM   1227  CB  GLN   146      16.665  53.070  23.581  1.00  0.01
ATOM   1228  CG  GLN   146      17.349  54.326  23.062  1.00  0.01
ATOM   1229  CD  GLN   146      18.377  53.941  22.007  1.00  0.29
ATOM   1230  OE1 GLN   146      19.575  54.215  22.155  1.00  0.88
ATOM   1231  NE2 GLN   146      17.900  53.274  20.972  1.00  1.30
ATOM   1234  C   GLN   146      15.158  52.083  25.284  1.00  0.02
ATOM   1235  O   GLN   146      14.116  51.673  24.761  1.00  0.01
ATOM   1236  N   LEU   147      15.706  51.494  26.330  1.00  0.02
ATOM   1238  CA  LEU   147      15.073  50.319  26.932  1.00  0.01
ATOM   1239  CB  LEU   147      16.161  49.432  27.518  1.00  0.03
ATOM   1240  CG  LEU   147      16.878  48.635  26.437  1.00  0.01
ATOM   1241  CD1 LEU   147      18.188  48.044  26.948  1.00  0.12
ATOM   1242  CD2 LEU   147      15.961  47.549  25.886  1.00  0.13
ATOM   1243  C   LEU   147      14.073  50.705  28.015  1.00  0.01
ATOM   1244  O   LEU   147      13.054  50.024  28.170  1.00  0.02
ATOM   1245  N   GLU   148      14.229  51.901  28.561  1.00  0.03
ATOM   1247  CA  GLU   148      13.272  52.414  29.551  1.00  0.01
ATOM   1248  CB  GLU   148      13.954  53.522  30.343  1.00  0.03
ATOM   1249  CG  GLU   148      15.066  52.958  31.216  1.00  0.02
ATOM   1250  CD  GLU   148      15.985  54.075  31.692  1.00  0.03
ATOM   1251  OE1 GLU   148      16.298  54.933  30.875  1.00  0.02
ATOM   1252  OE2 GLU   148      16.502  53.952  32.794  1.00  0.03
ATOM   1253  C   GLU   148      12.016  52.967  28.887  1.00  0.03
ATOM   1254  O   GLU   148      10.935  52.949  29.483  1.00  0.02
ATOM   1255  N   ASN   149      12.156  53.369  27.635  1.00  0.03
ATOM   1257  CA  ASN   149      11.007  53.798  26.831  1.00  0.03
ATOM   1258  CB  ASN   149      11.391  55.053  26.050  1.00  0.03
ATOM   1259  CG  ASN   149      11.446  56.279  26.964  1.00  0.03
ATOM   1260  OD1 ASN   149      10.406  56.814  27.363  1.00  0.73
ATOM   1261  ND2 ASN   149      12.652  56.713  27.290  1.00  0.56
ATOM   1264  C   ASN   149      10.515  52.689  25.890  1.00  0.02
ATOM   1265  O   ASN   149       9.627  52.923  25.061  1.00  0.03
ATOM   1266  N   MET   150      11.092  51.501  26.036  1.00  0.01
ATOM   1268  CA  MET   150      10.728  50.305  25.252  1.00  0.01
ATOM   1269  CB  MET   150       9.320  49.876  25.651  1.00  0.03
ATOM   1270  CG  MET   150       9.217  49.553  27.139  1.00  0.02
ATOM   1271  SD  MET   150       7.570  49.055  27.690  1.00  1.08
ATOM   1272  CE  MET   150       7.922  48.759  29.438  1.00  0.94
ATOM   1273  C   MET   150      10.774  50.508  23.737  1.00  0.01
ATOM   1274  O   MET   150       9.806  50.211  23.031  1.00  0.01
ATOM   1275  N   ASP   151      11.889  51.018  23.243  1.00  0.02
ATOM   1277  CA  ASP   151      12.053  51.241  21.802  1.00  0.02
ATOM   1278  CB  ASP   151      12.250  52.728  21.529  1.00  0.02
ATOM   1279  CG  ASP   151      11.115  53.581  22.085  1.00  0.02
ATOM   1280  OD1 ASP   151      10.118  53.715  21.392  1.00  0.14
ATOM   1281  OD2 ASP   151      11.401  54.291  23.040  1.00  0.14
ATOM   1282  C   ASP   151      13.279  50.515  21.257  1.00  0.02
ATOM   1283  O   ASP   151      13.466  50.441  20.036  1.00  0.02
ATOM   1284  N   TYR   152      14.147  50.057  22.144  1.00  0.01
ATOM   1286  CA  TYR   152      15.388  49.425  21.679  1.00  0.02
ATOM   1287  CB  TYR   152      16.430  49.436  22.791  1.00  0.02
ATOM   1288  CG  TYR   152      17.752  48.775  22.399  1.00  0.01
ATOM   1289  CD1 TYR   152      18.588  49.392  21.476  1.00  0.02
ATOM   1290  CE1 TYR   152      19.783  48.787  21.109  1.00  0.02
ATOM   1291  CZ  TYR   152      20.139  47.566  21.665  1.00  0.02
ATOM   1292  OH  TYR   152      21.324  46.964  21.299  1.00  0.01
ATOM   1293  CE2 TYR   152      19.307  46.946  22.588  1.00  0.02
ATOM   1294  CD2 TYR   152      18.111  47.552  22.953  1.00  0.02
ATOM   1295  C   TYR   152      15.173  47.996  21.186  1.00  0.01
ATOM   1296  O   TYR   152      14.821  47.089  21.947  1.00  0.01
ATOM   1297  N   SER   153      15.376  47.834  19.890  1.00  0.01
ATOM   1299  CA  SER   153      15.390  46.508  19.269  1.00  0.02
ATOM   1300  CB  SER   153      14.896  46.639  17.834  1.00  0.01
ATOM   1301  OG  SER   153      13.593  47.209  17.885  1.00  0.89
ATOM   1302  C   SER   153      16.810  45.950  19.292  1.00  0.02
ATOM   1303  O   SER   153      17.785  46.702  19.175  1.00  0.01
ATOM   1304  N   PHE   154      16.925  44.647  19.476  1.00  0.02
ATOM   1306  CA  PHE   154      18.255  44.038  19.593  1.00  0.02
ATOM   1307  CB  PHE   154      18.473  43.589  21.038  1.00  0.02
ATOM   1308  CG  PHE   154      17.618  42.423  21.534  1.00  0.01
ATOM   1309  CD1 PHE   154      18.110  41.127  21.458  1.00  0.02
ATOM   1310  CE1 PHE   154      17.341  40.063  21.908  1.00  0.01
ATOM   1311  CZ  PHE   154      16.083  40.296  22.445  1.00  0.01
ATOM   1312  CE2 PHE   154      15.597  41.593  22.539  1.00  0.02
ATOM   1313  CD2 PHE   154      16.366  42.657  22.090  1.00  0.02
ATOM   1314  C   PHE   154      18.466  42.871  18.627  1.00  0.01
ATOM   1315  O   PHE   154      17.536  42.126  18.287  1.00  0.01
ATOM   1316  N   GLU   155      19.693  42.774  18.142  1.00  0.01
ATOM   1318  CA  GLU   155      20.086  41.649  17.285  1.00  0.01
ATOM   1319  CB  GLU   155      20.649  42.157  15.965  1.00  0.01
ATOM   1320  CG  GLU   155      19.561  42.724  15.063  1.00  1.16
ATOM   1321  CD  GLU   155      20.161  43.083  13.709  1.00  1.17
ATOM   1322  OE1 GLU   155      21.253  42.607  13.431  1.00  1.57
ATOM   1323  OE2 GLU   155      19.572  43.911  13.027  1.00  1.34
ATOM   1324  C   GLU   155      21.103  40.742  17.972  1.00  0.02
ATOM   1325  O   GLU   155      22.065  41.198  18.603  1.00  0.01
ATOM   1326  N   CYS   156      20.886  39.451  17.797  1.00  0.02
ATOM   1328  CA  CYS   156      21.726  38.435  18.433  1.00  0.01
ATOM   1329  CB  CYS   156      20.834  37.295  18.900  1.00  0.02
ATOM   1330  SG  CYS   156      19.410  37.781  19.897  1.00  0.02
ATOM   1331  C   CYS   156      22.766  37.896  17.459  1.00  0.01
ATOM   1332  O   CYS   156      22.449  37.141  16.528  1.00  0.02
ATOM   1333  N   GLN   157      24.013  38.200  17.767  1.00  0.03
ATOM   1335  CA  GLN   157      25.147  37.796  16.931  1.00  0.02
ATOM   1336  CB  GLN   157      26.362  38.522  17.488  1.00  0.02
ATOM   1337  CG  GLN   157      27.581  38.422  16.589  1.00  0.02
ATOM   1338  CD  GLN   157      28.591  39.456  17.063  1.00  0.02
ATOM   1339  OE1 GLN   157      29.232  40.139  16.257  1.00  0.03
ATOM   1340  NE2 GLN   157      28.647  39.620  18.373  1.00  0.01
ATOM   1343  C   GLN   157      25.318  36.281  16.991  1.00  0.01
ATOM   1344  O   GLN   157      25.441  35.701  18.075  1.00  0.02
ATOM   1345  N   THR   158      25.317  35.646  15.835  1.00  0.02
ATOM   1347  CA  THR   158      25.208  34.185  15.785  1.00  0.01
ATOM   1348  CB  THR   158      24.269  33.885  14.624  1.00  0.02
ATOM   1349  OG1 THR   158      23.135  34.728  14.769  1.00  0.01
ATOM   1350  CG2 THR   158      23.784  32.446  14.602  1.00  0.01
ATOM   1351  C   THR   158      26.564  33.494  15.608  1.00  0.01
ATOM   1352  O   THR   158      26.909  33.024  14.519  1.00  0.02
ATOM   1353  N   PHE   159      27.276  33.360  16.716  1.00  0.02
ATOM   1355  CA  PHE   159      28.618  32.761  16.700  1.00  0.02
ATOM   1356  CB  PHE   159      29.446  33.339  17.841  1.00  0.01
ATOM   1357  CG  PHE   159      30.126  34.664  17.513  1.00  0.03
ATOM   1358  CD1 PHE   159      30.582  34.902  16.223  1.00  0.02
ATOM   1359  CE1 PHE   159      31.211  36.101  15.917  1.00  0.02
ATOM   1360  CZ  PHE   159      31.391  37.061  16.905  1.00  0.02
ATOM   1361  CE2 PHE   159      30.941  36.820  18.197  1.00  0.02
ATOM   1362  CD2 PHE   159      30.310  35.621  18.502  1.00  0.02
ATOM   1363  C   PHE   159      28.595  31.242  16.814  1.00  0.01
ATOM   1364  O   PHE   159      27.751  30.654  17.496  1.00  0.01
ATOM   1365  N   LEU   160      29.530  30.618  16.122  1.00  0.01
ATOM   1367  CA  LEU   160      29.686  29.160  16.181  1.00  0.02
ATOM   1368  CB  LEU   160      30.668  28.758  15.090  1.00  0.01
ATOM   1369  CG  LEU   160      30.160  29.153  13.711  1.00  0.01
ATOM   1370  CD1 LEU   160      31.279  29.081  12.685  1.00  0.01
ATOM   1371  CD2 LEU   160      28.968  28.301  13.289  1.00  0.02
ATOM   1372  C   LEU   160      30.240  28.727  17.535  1.00  0.02
ATOM   1373  O   LEU   160      31.174  29.348  18.058  1.00  0.02
ATOM   1374  N   LYS   161      29.659  27.688  18.108  1.00  0.01
ATOM   1376  CA  LYS   161      30.136  27.223  19.413  1.00  0.01
ATOM   1377  CB  LYS   161      28.945  26.698  20.205  1.00  0.02
ATOM   1378  CG  LYS   161      29.327  26.287  21.620  1.00  0.01
ATOM   1379  CD  LYS   161      28.089  25.899  22.421  1.00  0.01
ATOM   1380  CE  LYS   161      28.465  25.434  23.822  1.00  0.01
ATOM   1381  NZ  LYS   161      29.202  26.487  24.538  1.00  0.01
ATOM   1382  C   LYS   161      31.202  26.139  19.280  1.00  0.01
ATOM   1383  O   LYS   161      30.900  24.972  18.998  1.00  0.01
ATOM   1384  N   ASP   162      32.445  26.539  19.505  1.00  0.02
ATOM   1386  CA  ASP   162      33.548  25.572  19.552  1.00  0.02
ATOM   1387  CB  ASP   162      34.888  26.304  19.579  1.00  0.01
ATOM   1388  CG  ASP   162      36.029  25.300  19.422  1.00  0.02
ATOM   1389  OD1 ASP   162      35.790  24.261  18.821  1.00  0.02
ATOM   1390  OD2 ASP   162      37.130  25.589  19.877  1.00  0.01
ATOM   1391  C   ASP   162      33.382  24.714  20.801  1.00  0.02
ATOM   1392  O   ASP   162      33.316  25.215  21.928  1.00  0.02
ATOM   1393  N   GLU   163      33.269  23.418  20.572  1.00  0.01
ATOM   1395  CA  GLU   163      32.928  22.481  21.645  1.00  0.02
ATOM   1396  CB  GLU   163      31.415  22.541  21.806  1.00  0.01
ATOM   1397  CG  GLU   163      30.746  22.203  20.479  1.00  0.02
ATOM   1398  CD  GLU   163      29.276  22.584  20.512  1.00  0.02
ATOM   1399  OE1 GLU   163      28.819  22.935  21.587  1.00  0.02
ATOM   1400  OE2 GLU   163      28.615  22.435  19.493  1.00  0.01
ATOM   1401  C   GLU   163      33.339  21.066  21.270  1.00  0.01
ATOM   1402  O   GLU   163      33.629  20.794  20.101  1.00  0.02
ATOM   1403  N   ILE   164      33.386  20.182  22.250  1.00  0.01
ATOM   1405  CA  ILE   164      33.670  18.777  21.945  1.00  0.01
ATOM   1406  CB  ILE   164      34.532  18.165  23.044  1.00  0.02
ATOM   1407  CG2 ILE   164      34.728  16.669  22.815  1.00  0.02
ATOM   1408  CG1 ILE   164      35.885  18.858  23.085  1.00  0.02
ATOM   1409  CD1 ILE   164      36.602  18.699  21.749  1.00  0.02
ATOM   1410  C   ILE   164      32.371  18.000  21.771  1.00  0.02
ATOM   1411  O   ILE   164      31.688  17.643  22.737  1.00  0.01
ATOM   1412  N   ARG   165      32.023  17.801  20.514  1.00  0.01
ATOM   1414  CA  ARG   165      30.847  17.020  20.149  1.00  0.01
ATOM   1415  CB  ARG   165      30.336  17.528  18.800  1.00  0.01
ATOM   1416  CG  ARG   165      29.870  18.981  18.827  1.00  0.02
ATOM   1417  CD  ARG   165      28.366  19.129  19.056  1.00  0.02
ATOM   1418  NE  ARG   165      27.937  18.707  20.398  1.00  0.02
ATOM   1419  CZ  ARG   165      26.659  18.700  20.779  1.00  0.01
ATOM   1420  NH1 ARG   165      25.709  19.102  19.933  1.00  0.01
ATOM   1421  NH2 ARG   165      26.330  18.296  22.008  1.00  0.02
ATOM   1422  C   ARG   165      31.253  15.561  20.015  1.00  0.01
ATOM   1423  O   ARG   165      32.447  15.252  19.923  1.00  0.01
ATOM   1424  N   PRO   166      30.289  14.663  20.112  1.00  0.02
ATOM   1425  CA  PRO   166      30.488  13.345  19.519  1.00  0.01
ATOM   1426  CB  PRO   166      29.199  12.614  19.723  1.00  0.01
ATOM   1427  CG  PRO   166      28.202  13.547  20.393  1.00  0.02
ATOM   1428  CD  PRO   166      28.908  14.884  20.547  1.00  0.01
ATOM   1429  C   PRO   166      30.834  13.512  18.044  1.00  0.02
ATOM   1430  O   PRO   166      30.305  14.404  17.367  1.00  0.01
ATOM   1431  N   SER   167      31.626  12.592  17.525  1.00  0.01
ATOM   1433  CA  SER   167      32.129  12.709  16.148  1.00  0.01
ATOM   1434  CB  SER   167      33.231  11.675  15.936  1.00  0.01
ATOM   1435  OG  SER   167      32.683  10.383  16.161  1.00  0.28
ATOM   1436  C   SER   167      31.048  12.537  15.079  1.00  0.01
ATOM   1437  O   SER   167      31.148  13.179  14.028  1.00  0.01
ATOM   1438  N   GLU   168      29.915  11.956  15.444  1.00  0.02
ATOM   1440  CA  GLU   168      28.795  11.877  14.504  1.00  0.01
ATOM   1441  CB  GLU   168      27.826  10.802  14.980  1.00  0.01
ATOM   1442  CG  GLU   168      26.666  10.622  14.005  1.00  0.01
ATOM   1443  CD  GLU   168      25.718   9.551  14.530  1.00  0.01
ATOM   1444  OE1 GLU   168      25.131   8.851  13.717  1.00  0.01
ATOM   1445  OE2 GLU   168      25.661   9.406  15.743  1.00  0.01
ATOM   1446  C   GLU   168      28.062  13.215  14.387  1.00  0.01
ATOM   1447  O   GLU   168      27.639  13.569  13.283  1.00  0.02
ATOM   1448  N   LYS   169      28.148  14.048  15.413  1.00  0.02
ATOM   1450  CA  LYS   169      27.522  15.368  15.339  1.00  0.02
ATOM   1451  CB  LYS   169      27.177  15.862  16.735  1.00  0.01
ATOM   1452  CG  LYS   169      26.095  15.007  17.377  1.00  0.02
ATOM   1453  CD  LYS   169      25.658  15.615  18.702  1.00  0.01
ATOM   1454  CE  LYS   169      24.575  14.785  19.378  1.00  0.02
ATOM   1455  NZ  LYS   169      24.193  15.388  20.665  1.00  0.01
ATOM   1456  C   LYS   169      28.462  16.357  14.671  1.00  0.01
ATOM   1457  O   LYS   169      28.006  17.185  13.871  1.00  0.02
ATOM   1458  N   VAL   170      29.752  16.081  14.765  1.00  0.01
ATOM   1460  CA  VAL   170      30.737  16.887  14.043  1.00  0.01
ATOM   1461  CB  VAL   170      32.137  16.463  14.474  1.00  0.02
ATOM   1462  CG1 VAL   170      33.208  17.184  13.663  1.00  0.02
ATOM   1463  CG2 VAL   170      32.352  16.680  15.964  1.00  0.02
ATOM   1464  C   VAL   170      30.593  16.658  12.544  1.00  0.00
ATOM   1465  O   VAL   170      30.363  17.626  11.809  1.00  0.01
ATOM   1466  N   ARG   171      30.387  15.402  12.181  1.00  0.01
ATOM   1468  CA  ARG   171      30.273  15.002  10.779  1.00  0.01
ATOM   1469  CB  ARG   171      30.552  13.504  10.779  1.00  0.02
ATOM   1470  CG  ARG   171      30.584  12.884   9.392  1.00  0.01
ATOM   1471  CD  ARG   171      31.031  11.428   9.464  1.00  0.01
ATOM   1472  NE  ARG   171      30.129  10.627  10.309  1.00  0.01
ATOM   1473  CZ  ARG   171      30.534   9.965  11.396  1.00  0.01
ATOM   1474  NH1 ARG   171      31.789  10.097  11.832  1.00  0.01
ATOM   1475  NH2 ARG   171      29.664   9.229  12.090  1.00  0.01
ATOM   1476  C   ARG   171      28.899  15.296  10.169  1.00  0.01
ATOM   1477  O   ARG   171      28.795  15.538   8.959  1.00  0.01
ATOM   1478  N   ALA   172      27.880  15.412  11.004  1.00  0.01
ATOM   1480  CA  ALA   172      26.545  15.758  10.505  1.00  0.01
ATOM   1481  CB  ALA   172      25.500  15.067  11.370  1.00  0.00
ATOM   1482  C   ALA   172      26.277  17.263  10.478  1.00  0.01
ATOM   1483  O   ALA   172      25.247  17.694   9.946  1.00  0.01
ATOM   1484  N   GLY   173      27.188  18.046  11.033  1.00  0.01
ATOM   1486  CA  GLY   173      27.060  19.504  10.988  1.00  0.01
ATOM   1487  C   GLY   173      26.221  20.036  12.141  1.00  0.01
ATOM   1488  O   GLY   173      25.683  21.148  12.070  1.00  0.01
ATOM   1489  N   LYS   174      26.237  19.312  13.246  1.00  0.01
ATOM   1491  CA  LYS   174      25.431  19.678  14.413  1.00  0.01
ATOM   1492  CB  LYS   174      24.896  18.411  15.062  1.00  0.01
ATOM   1493  CG  LYS   174      24.072  17.603  14.070  1.00  0.01
ATOM   1494  CD  LYS   174      23.455  16.375  14.725  1.00  0.01
ATOM   1495  CE  LYS   174      22.629  15.584  13.719  1.00  0.01
ATOM   1496  NZ  LYS   174      21.604  16.441  13.102  1.00  0.01
ATOM   1497  C   LYS   174      26.247  20.471  15.425  1.00  0.01
ATOM   1498  O   LYS   174      26.466  20.029  16.559  1.00  0.01
ATOM   1499  N   THR   175      26.719  21.624  14.988  1.00  0.01
ATOM   1501  CA  THR   175      27.445  22.530  15.873  1.00  0.00
ATOM   1502  CB  THR   175      28.466  23.288  15.033  1.00  0.01
ATOM   1503  OG1 THR   175      29.413  22.340  14.561  1.00  0.01
ATOM   1504  CG2 THR   175      29.212  24.342  15.843  1.00  0.02
ATOM   1505  C   THR   175      26.464  23.499  16.520  1.00  0.01
ATOM   1506  O   THR   175      25.742  24.218  15.821  1.00  0.02
ATOM   1507  N   ARG   176      26.437  23.510  17.842  1.00  0.01
ATOM   1509  CA  ARG   176      25.543  24.418  18.560  1.00  0.02
ATOM   1510  CB  ARG   176      25.510  24.057  20.039  1.00  0.01
ATOM   1511  CG  ARG   176      24.760  22.744  20.235  1.00  0.01
ATOM   1512  CD  ARG   176      24.612  22.381  21.707  1.00  0.01
ATOM   1513  NE  ARG   176      25.921  22.114  22.319  1.00  0.01
ATOM   1514  CZ  ARG   176      26.065  21.665  23.567  1.00  0.02
ATOM   1515  NH1 ARG   176      24.990  21.455  24.328  1.00  0.02
ATOM   1516  NH2 ARG   176      27.285  21.428  24.054  1.00  0.01
ATOM   1517  C   ARG   176      25.946  25.872  18.344  1.00  0.01
ATOM   1518  O   ARG   176      27.032  26.183  17.836  1.00  0.00
ATOM   1519  N   ILE   177      24.995  26.748  18.597  1.00  0.02
ATOM   1521  CA  ILE   177      25.205  28.158  18.289  1.00  0.02
ATOM   1522  CB  ILE   177      24.132  28.546  17.273  1.00  0.01
ATOM   1523  CG2 ILE   177      22.798  28.869  17.938  1.00  0.01
ATOM   1524  CG1 ILE   177      24.588  29.702  16.401  1.00  0.01
ATOM   1525  CD1 ILE   177      25.730  29.274  15.485  1.00  0.02
ATOM   1526  C   ILE   177      25.147  29.022  19.551  1.00  0.01
ATOM   1527  O   ILE   177      24.435  28.706  20.511  1.00  0.01
ATOM   1528  N   VAL   178      26.003  30.029  19.587  1.00  0.02
ATOM   1530  CA  VAL   178      26.006  31.006  20.677  1.00  0.02
ATOM   1531  CB  VAL   178      27.429  31.217  21.183  1.00  0.01
ATOM   1532  CG1 VAL   178      27.453  32.219  22.332  1.00  0.01
ATOM   1533  CG2 VAL   178      28.049  29.902  21.633  1.00  0.02
ATOM   1534  C   VAL   178      25.429  32.328  20.184  1.00  0.02
ATOM   1535  O   VAL   178      26.070  33.088  19.445  1.00  0.02
ATOM   1536  N   ASP   179      24.181  32.548  20.554  1.00  0.01
ATOM   1538  CA  ASP   179      23.467  33.780  20.199  1.00  0.02
ATOM   1539  CB  ASP   179      21.976  33.502  20.285  1.00  0.02
ATOM   1540  CG  ASP   179      21.628  32.211  19.552  1.00  0.02
ATOM   1541  OD1 ASP   179      22.056  32.054  18.417  1.00  0.01
ATOM   1542  OD2 ASP   179      20.837  31.462  20.111  1.00  0.02
ATOM   1543  C   ASP   179      23.801  34.904  21.177  1.00  0.02
ATOM   1544  O   ASP   179      23.050  35.160  22.127  1.00  0.01
ATOM   1545  N   VAL   180      24.842  35.644  20.837  1.00  0.02
ATOM   1547  CA  VAL   180      25.375  36.707  21.690  1.00  0.02
ATOM   1548  CB  VAL   180      26.799  37.012  21.232  1.00  0.02
ATOM   1549  CG1 VAL   180      27.469  38.025  22.152  1.00  0.02
ATOM   1550  CG2 VAL   180      27.633  35.739  21.160  1.00  0.02
ATOM   1551  C   VAL   180      24.537  37.977  21.597  1.00  0.02
ATOM   1552  O   VAL   180      24.603  38.725  20.610  1.00  0.02
ATOM   1553  N   LEU   181      23.798  38.229  22.662  1.00  0.01
ATOM   1555  CA  LEU   181      22.984  39.443  22.772  1.00  0.01
ATOM   1556  CB  LEU   181      22.080  39.332  24.001  1.00  0.02
ATOM   1557  CG  LEU   181      20.662  38.857  23.686  1.00  0.02
ATOM   1558  CD1 LEU   181      20.604  37.380  23.307  1.00  0.01
ATOM   1559  CD2 LEU   181      19.761  39.115  24.885  1.00  0.02
ATOM   1560  C   LEU   181      23.874  40.673  22.915  1.00  0.02
ATOM   1561  O   LEU   181      25.056  40.555  23.262  1.00  0.02
ATOM   1562  N   PRO   182      23.348  41.818  22.511  1.00  0.02
ATOM   1563  CA  PRO   182      23.990  43.088  22.841  1.00  0.02
ATOM   1564  CB  PRO   182      23.098  44.146  22.279  1.00  0.02
ATOM   1565  CG  PRO   182      21.903  43.491  21.613  1.00  0.01
ATOM   1566  CD  PRO   182      22.066  41.997  21.826  1.00  0.01
ATOM   1567  C   PRO   182      24.168  43.233  24.348  1.00  0.02
ATOM   1568  O   PRO   182      23.250  42.967  25.139  1.00  0.02
ATOM   1569  N   LEU   183      25.293  43.824  24.708  1.00  0.02
ATOM   1571  CA  LEU   183      25.729  43.934  26.104  1.00  0.01
ATOM   1572  CB  LEU   183      27.122  44.549  26.072  1.00  0.02
ATOM   1573  CG  LEU   183      27.719  44.730  27.458  1.00  0.07
ATOM   1574  CD1 LEU   183      27.767  43.407  28.210  1.00  0.13
ATOM   1575  CD2 LEU   183      29.109  45.346  27.363  1.00  0.16
ATOM   1576  C   LEU   183      24.813  44.802  26.961  1.00  0.01
ATOM   1577  O   LEU   183      24.474  44.397  28.079  1.00  0.01
ATOM   1578  N   GLU   184      24.162  45.767  26.338  1.00  0.02
ATOM   1580  CA  GLU   184      23.240  46.637  27.070  1.00  0.03
ATOM   1581  CB  GLU   184      22.981  47.941  26.298  1.00  0.02
ATOM   1582  CG  GLU   184      22.228  47.790  24.971  1.00  0.02
ATOM   1583  CD  GLU   184      23.168  47.705  23.766  1.00  0.02
ATOM   1584  OE1 GLU   184      23.952  46.765  23.717  1.00  0.02
ATOM   1585  OE2 GLU   184      23.128  48.592  22.934  1.00  0.02
ATOM   1586  C   GLU   184      21.913  45.940  27.390  1.00  0.02
ATOM   1587  O   GLU   184      21.357  46.206  28.461  1.00  0.01
ATOM   1588  N   HIS   185      21.570  44.882  26.671  1.00  0.02
ATOM   1590  CA  HIS   185      20.325  44.193  26.991  1.00  0.02
ATOM   1591  CB  HIS   185      19.741  43.559  25.734  1.00  0.02
ATOM   1592  CG  HIS   185      18.299  43.118  25.904  1.00  0.02
ATOM   1593  ND1 HIS   185      17.858  41.936  26.378  1.00  0.02
ATOM   1595  CE1 HIS   185      16.509  41.930  26.376  1.00  0.03
ATOM   1596  NE2 HIS   185      16.095  43.127  25.904  1.00  0.02
ATOM   1597  CD2 HIS   185      17.186  43.870  25.611  1.00  0.02
ATOM   1598  C   HIS   185      20.614  43.123  28.032  1.00  0.03
ATOM   1599  O   HIS   185      19.796  42.891  28.929  1.00  0.02
ATOM   1600  N   ILE   186      21.857  42.674  28.062  1.00  0.02
ATOM   1602  CA  ILE   186      22.257  41.689  29.064  1.00  0.01
ATOM   1603  CB  ILE   186      23.580  41.064  28.641  1.00  0.02
ATOM   1604  CG2 ILE   186      24.028  40.026  29.664  1.00  0.03
ATOM   1605  CG1 ILE   186      23.456  40.429  27.262  1.00  0.02
ATOM   1606  CD1 ILE   186      24.781  39.835  26.804  1.00  0.02
ATOM   1607  C   ILE   186      22.414  42.352  30.426  1.00  0.01
ATOM   1608  O   ILE   186      21.793  41.887  31.390  1.00  0.02
ATOM   1609  N   ILE   187      22.961  43.558  30.443  1.00  0.02
ATOM   1611  CA  ILE   187      23.150  44.262  31.715  1.00  0.02
ATOM   1612  CB  ILE   187      24.177  45.368  31.521  1.00  0.02
ATOM   1613  CG2 ILE   187      24.432  46.111  32.828  1.00  0.48
ATOM   1614  CG1 ILE   187      25.478  44.794  30.992  1.00  0.31
ATOM   1615  CD1 ILE   187      26.522  45.885  30.834  1.00  0.03
ATOM   1616  C   ILE   187      21.861  44.884  32.233  1.00  0.03
ATOM   1617  O   ILE   187      21.616  44.848  33.445  1.00  0.02
ATOM   1618  N   PHE   188      20.947  45.230  31.341  1.00  0.02
ATOM   1620  CA  PHE   188      19.692  45.792  31.831  1.00  0.02
ATOM   1621  CB  PHE   188      19.051  46.656  30.756  1.00  0.02
ATOM   1622  CG  PHE   188      18.342  47.881  31.329  1.00  0.02
ATOM   1623  CD1 PHE   188      18.408  48.144  32.691  1.00  0.01
ATOM   1624  CE1 PHE   188      17.772  49.262  33.217  1.00  0.02
ATOM   1625  CZ  PHE   188      17.074  50.121  32.378  1.00  0.02
ATOM   1626  CE2 PHE   188      17.014  49.861  31.016  1.00  0.02
ATOM   1627  CD2 PHE   188      17.650  48.744  30.493  1.00  0.03
ATOM   1628  C   PHE   188      18.742  44.682  32.269  1.00  0.03
ATOM   1629  O   PHE   188      18.023  44.870  33.258  1.00  0.02
ATOM   1630  N   SER   189      18.941  43.478  31.754  1.00  0.02
ATOM   1632  CA  SER   189      18.173  42.337  32.252  1.00  0.02
ATOM   1633  CB  SER   189      18.135  41.244  31.195  1.00  0.02
ATOM   1634  OG  SER   189      17.457  41.762  30.060  1.00  0.14
ATOM   1635  C   SER   189      18.775  41.805  33.550  1.00  0.02
ATOM   1636  O   SER   189      18.014  41.437  34.451  1.00  0.02
ATOM   1637  N   ARG   190      20.063  42.049  33.747  1.00  0.02
ATOM   1639  CA  ARG   190      20.717  41.758  35.030  1.00  0.02
ATOM   1640  CB  ARG   190      22.228  41.745  34.848  1.00  0.02
ATOM   1641  CG  ARG   190      22.724  40.473  34.177  1.00  0.02
ATOM   1642  CD  ARG   190      24.243  40.502  34.087  1.00  0.01
ATOM   1643  NE  ARG   190      24.814  40.861  35.396  1.00  0.01
ATOM   1644  CZ  ARG   190      25.839  40.226  35.969  1.00  0.00
ATOM   1645  NH1 ARG   190      26.363  39.145  35.388  1.00  0.02
ATOM   1646  NH2 ARG   190      26.304  40.646  37.148  1.00  0.02
ATOM   1647  C   ARG   190      20.373  42.797  36.094  1.00  0.03
ATOM   1648  O   ARG   190      20.578  42.554  37.287  1.00  0.03
ATOM   1649  N   LYS   191      19.822  43.924  35.685  1.00  0.02
ATOM   1651  CA  LYS   191      19.212  44.806  36.666  1.00  0.02
ATOM   1652  CB  LYS   191      19.140  46.227  36.135  1.00  0.02
ATOM   1653  CG  LYS   191      20.527  46.800  35.900  1.00  0.02
ATOM   1654  CD  LYS   191      20.441  48.300  35.672  1.00  0.76
ATOM   1655  CE  LYS   191      21.816  48.916  35.472  1.00  0.03
ATOM   1656  NZ  LYS   191      21.713  50.380  35.372  1.00  1.10
ATOM   1657  C   LYS   191      17.811  44.307  36.984  1.00  0.02
ATOM   1658  O   LYS   191      17.569  43.892  38.127  1.00  0.02
ATOM   1659  N   TYR   192      17.028  44.085  35.940  1.00  0.02
ATOM   1661  CA  TYR   192      15.607  43.708  36.070  1.00  0.03
ATOM   1662  CB  TYR   192      15.053  43.369  34.692  1.00  0.02
ATOM   1663  CG  TYR   192      14.980  44.506  33.680  1.00  0.02
ATOM   1664  CD1 TYR   192      15.065  44.208  32.326  1.00  1.52
ATOM   1665  CE1 TYR   192      14.997  45.225  31.384  1.00  2.23
ATOM   1666  CZ  TYR   192      14.843  46.539  31.801  1.00  1.82
ATOM   1667  OH  TYR   192      14.699  47.536  30.861  1.00  2.46
ATOM   1668  CE2 TYR   192      14.756  46.841  33.154  1.00  0.71
ATOM   1669  CD2 TYR   192      14.817  45.822  34.094  1.00  0.25
ATOM   1670  C   TYR   192      15.383  42.488  36.956  1.00  0.01
ATOM   1671  O   TYR   192      14.747  42.596  38.010  1.00  0.01
ATOM   1672  N   LEU   193      15.993  41.378  36.578  1.00  0.03
ATOM   1674  CA  LEU   193      15.864  40.125  37.330  1.00  0.03
ATOM   1675  CB  LEU   193      15.435  39.012  36.367  1.00  0.03
ATOM   1676  CG  LEU   193      16.183  39.013  35.031  1.00  0.14
ATOM   1677  CD1 LEU   193      17.552  38.346  35.121  1.00  0.01
ATOM   1678  CD2 LEU   193      15.366  38.310  33.954  1.00  0.56
ATOM   1679  C   LEU   193      17.131  39.768  38.113  1.00  0.02
ATOM   1680  O   LEU   193      17.273  38.626  38.573  1.00  0.02
ATOM   1681  N   GLY   194      17.962  40.763  38.378  1.00  0.02
ATOM   1683  CA  GLY   194      19.264  40.540  39.025  1.00  0.03
ATOM   1684  C   GLY   194      19.153  39.951  40.422  1.00  0.03
ATOM   1685  O   GLY   194      19.705  38.873  40.684  1.00  0.02
ATOM   1686  N   ARG   195      18.267  40.522  41.225  1.00  0.03
ATOM   1688  CA  ARG   195      18.083  40.029  42.595  1.00  0.02
ATOM   1689  CB  ARG   195      17.236  41.042  43.349  1.00  0.03
ATOM   1690  CG  ARG   195      17.633  41.132  44.815  1.00  0.02
ATOM   1691  CD  ARG   195      18.908  41.951  44.949  1.00  0.02
ATOM   1692  NE  ARG   195      18.687  43.292  44.383  1.00  0.01
ATOM   1693  CZ  ARG   195      19.324  44.387  44.800  1.00  0.02
ATOM   1694  NH1 ARG   195      20.273  44.293  45.733  1.00  0.02
ATOM   1695  NH2 ARG   195      19.049  45.569  44.244  1.00  0.02
ATOM   1696  C   ARG   195      17.357  38.680  42.635  1.00  0.01
ATOM   1697  O   ARG   195      17.619  37.874  43.535  1.00  0.03
ATOM   1698  N   PHE   196      16.675  38.341  41.552  1.00  0.02
ATOM   1700  CA  PHE   196      15.977  37.060  41.461  1.00  0.01
ATOM   1701  CB  PHE   196      14.938  37.190  40.357  1.00  0.02
ATOM   1702  CG  PHE   196      14.114  35.939  40.085  1.00  0.02
ATOM   1703  CD1 PHE   196      13.568  35.215  41.136  1.00  0.02
ATOM   1704  CE1 PHE   196      12.810  34.081  40.876  1.00  0.02
ATOM   1705  CZ  PHE   196      12.595  33.675  39.565  1.00  0.02
ATOM   1706  CE2 PHE   196      13.138  34.401  38.514  1.00  0.03
ATOM   1707  CD2 PHE   196      13.897  35.534  38.774  1.00  0.02
ATOM   1708  C   PHE   196      16.955  35.939  41.118  1.00  0.03
ATOM   1709  O   PHE   196      16.898  34.871  41.741  1.00  0.02
ATOM   1710  N   CYS   197      17.983  36.271  40.352  1.00  0.02
ATOM   1712  CA  CYS   197      19.036  35.299  40.050  1.00  0.02
ATOM   1713  CB  CYS   197      19.939  35.854  38.957  1.00  0.02
ATOM   1714  SG  CYS   197      19.135  36.186  37.379  1.00  0.02
ATOM   1715  C   CYS   197      19.878  35.044  41.287  1.00  0.02
ATOM   1716  O   CYS   197      20.024  33.883  41.690  1.00  0.02
ATOM   1717  N   ALA   198      20.124  36.110  42.033  1.00  0.02
ATOM   1719  CA  ALA   198      20.875  36.000  43.284  1.00  0.02
ATOM   1720  CB  ALA   198      21.104  37.405  43.827  1.00  0.02
ATOM   1721  C   ALA   198      20.134  35.161  44.321  1.00  0.02
ATOM   1722  O   ALA   198      20.703  34.182  44.822  1.00  0.03
ATOM   1723  N   ALA   199      18.825  35.345  44.404  1.00  0.02
ATOM   1725  CA  ALA   199      18.019  34.580  45.357  1.00  0.03
ATOM   1726  CB  ALA   199      16.650  35.239  45.478  1.00  0.02
ATOM   1727  C   ALA   199      17.846  33.115  44.960  1.00  0.02
ATOM   1728  O   ALA   199      17.887  32.256  45.850  1.00  0.02
ATOM   1729  N   MET   200      17.889  32.809  43.673  1.00  0.01
ATOM   1731  CA  MET   200      17.810  31.405  43.259  1.00  0.02
ATOM   1732  CB  MET   200      17.419  31.307  41.791  1.00  0.02
ATOM   1733  CG  MET   200      15.993  31.778  41.562  1.00  0.01
ATOM   1734  SD  MET   200      15.345  31.461  39.908  1.00  0.01
ATOM   1735  CE  MET   200      15.471  29.658  39.894  1.00  0.02
ATOM   1736  C   MET   200      19.133  30.682  43.450  1.00  0.02
ATOM   1737  O   MET   200      19.127  29.586  44.022  1.00  0.02
ATOM   1738  N   HIS   201      20.238  31.389  43.274  1.00  0.03
ATOM   1740  CA  HIS   201      21.551  30.755  43.441  1.00  0.02
ATOM   1741  CB  HIS   201      22.614  31.608  42.758  1.00  0.01
ATOM   1742  CG  HIS   201      22.438  31.784  41.261  1.00  0.02
ATOM   1743  ND1 HIS   201      22.763  32.882  40.554  1.00  0.02
ATOM   1745  CE1 HIS   201      22.467  32.684  39.255  1.00  0.02
ATOM   1746  NE2 HIS   201      21.948  31.441  39.142  1.00  0.01
ATOM   1747  CD2 HIS   201      21.926  30.872  40.369  1.00  0.01
ATOM   1748  C   HIS   201      21.921  30.590  44.913  1.00  0.01
ATOM   1749  O   HIS   201      22.684  29.682  45.260  1.00  0.02
ATOM   1750  N   ARG   202      21.294  31.367  45.781  1.00  0.02
ATOM   1752  CA  ARG   202      21.515  31.189  47.218  1.00  0.02
ATOM   1753  CB  ARG   202      21.412  32.548  47.897  1.00  0.02
ATOM   1754  CG  ARG   202      22.493  33.500  47.397  1.00  1.12
ATOM   1755  CD  ARG   202      22.388  34.858  48.080  1.00  0.99
ATOM   1756  NE  ARG   202      21.063  35.456  47.850  1.00  0.69
ATOM   1757  CZ  ARG   202      20.860  36.774  47.781  1.00  0.96
ATOM   1758  NH1 ARG   202      21.883  37.615  47.945  1.00  1.11
ATOM   1759  NH2 ARG   202      19.633  37.250  47.566  1.00  1.09
ATOM   1760  C   ARG   202      20.518  30.224  47.862  1.00  0.02
ATOM   1761  O   ARG   202      20.753  29.774  48.988  1.00  0.03
ATOM   1762  N   ASN   203      19.471  29.851  47.142  1.00  0.02
ATOM   1764  CA  ASN   203      18.433  28.978  47.711  1.00  0.03
ATOM   1765  CB  ASN   203      17.165  29.788  47.982  1.00  0.01
ATOM   1766  CG  ASN   203      17.332  30.800  49.115  1.00  0.02
ATOM   1767  OD1 ASN   203      17.395  30.432  50.293  1.00  0.02
ATOM   1768  ND2 ASN   203      17.366  32.067  48.742  1.00  0.01
ATOM   1771  C   ASN   203      18.053  27.830  46.780  1.00  0.01
ATOM   1772  O   ASN   203      16.890  27.407  46.785  1.00  0.01
ATOM   1773  N   TYR   204      19.005  27.330  46.009  1.00  0.02
ATOM   1775  CA  TYR   204      18.714  26.261  45.041  1.00  0.02
ATOM   1776  CB  TYR   204      19.931  26.013  44.151  1.00  0.02
ATOM   1777  CG  TYR   204      21.191  25.483  44.837  1.00  0.03
ATOM   1778  CD1 TYR   204      22.208  26.356  45.203  1.00  0.23
ATOM   1779  CE1 TYR   204      23.365  25.867  45.797  1.00  0.39
ATOM   1780  CZ  TYR   204      23.505  24.503  46.020  1.00  0.48
ATOM   1781  OH  TYR   204      24.768  23.988  46.238  1.00  0.70
ATOM   1782  CE2 TYR   204      22.479  23.632  45.680  1.00  0.40
ATOM   1783  CD2 TYR   204      21.326  24.122  45.084  1.00  0.27
ATOM   1784  C   TYR   204      18.281  24.966  45.728  1.00  0.01
ATOM   1785  O   TYR   204      18.541  24.752  46.918  1.00  0.02
ATOM   1786  N   GLY   205      17.616  24.113  44.969  1.00  0.02
ATOM   1788  CA  GLY   205      17.124  22.848  45.516  1.00  0.02
ATOM   1789  C   GLY   205      15.808  22.407  44.883  1.00  0.02
ATOM   1790  O   GLY   205      15.097  23.189  44.235  1.00  0.02
ATOM   1791  N   PRO   206      15.412  21.194  45.238  1.00  0.02
ATOM   1792  CA  PRO   206      14.224  20.550  44.657  1.00  0.02
ATOM   1793  CB  PRO   206      14.346  19.109  45.041  1.00  0.01
ATOM   1794  CG  PRO   206      15.487  18.947  46.034  1.00  0.02
ATOM   1795  CD  PRO   206      16.126  20.318  46.170  1.00  0.02
ATOM   1796  C   PRO   206      12.886  21.112  45.152  1.00  0.03
ATOM   1797  O   PRO   206      11.849  20.849  44.533  1.00  0.02
ATOM   1798  N   ASN   207      12.922  21.997  46.138  1.00  0.01
ATOM   1800  CA  ASN   207      11.703  22.635  46.636  1.00  0.03
ATOM   1801  CB  ASN   207      12.015  23.194  48.020  1.00  0.02
ATOM   1802  CG  ASN   207      10.755  23.765  48.657  1.00  0.02
ATOM   1803  OD1 ASN   207       9.765  23.051  48.845  1.00  0.38
ATOM   1804  ND2 ASN   207      10.816  25.037  49.007  1.00  0.74
ATOM   1807  C   ASN   207      11.254  23.764  45.704  1.00  0.03
ATOM   1808  O   ASN   207      10.053  23.974  45.505  1.00  0.01
ATOM   1809  N   ILE   208      12.209  24.362  45.008  1.00  0.01
ATOM   1811  CA  ILE   208      11.867  25.353  43.983  1.00  0.02
ATOM   1812  CB  ILE   208      12.756  26.588  44.123  1.00  0.01
ATOM   1813  CG2 ILE   208      12.485  27.290  45.448  1.00  0.02
ATOM   1814  CG1 ILE   208      14.236  26.251  43.994  1.00  0.01
ATOM   1815  CD1 ILE   208      15.093  27.511  44.028  1.00  0.02
ATOM   1816  C   ILE   208      12.003  24.744  42.587  1.00  0.00
ATOM   1817  O   ILE   208      11.897  25.452  41.578  1.00  0.02
ATOM   1818  N   GLY   209      12.338  23.463  42.558  1.00  0.02
ATOM   1820  CA  GLY   209      12.522  22.716  41.316  1.00  0.02
ATOM   1821  C   GLY   209      13.737  23.163  40.513  1.00  0.02
ATOM   1822  O   GLY   209      13.770  22.968  39.291  1.00  0.01
ATOM   1823  N   SER   210      14.752  23.684  41.178  1.00  0.01
ATOM   1825  CA  SER   210      15.867  24.269  40.431  1.00  0.01
ATOM   1826  CB  SER   210      15.761  25.784  40.464  1.00  0.02
ATOM   1827  OG  SER   210      16.974  26.280  39.910  1.00  0.02
ATOM   1828  C   SER   210      17.233  23.895  40.966  1.00  0.01
ATOM   1829  O   SER   210      17.554  24.129  42.135  1.00  0.01
ATOM   1830  N   ALA   211      18.072  23.436  40.058  1.00  0.02
ATOM   1832  CA  ALA   211      19.466  23.155  40.385  1.00  0.01
ATOM   1833  CB  ALA   211      19.870  21.847  39.724  1.00  0.02
ATOM   1834  C   ALA   211      20.411  24.264  39.930  1.00  0.01
ATOM   1835  O   ALA   211      21.629  24.057  39.951  1.00  0.01
ATOM   1836  N   VAL   212      19.891  25.411  39.516  1.00  0.01
ATOM   1838  CA  VAL   212      20.779  26.440  38.965  1.00  0.03
ATOM   1839  CB  VAL   212      19.940  27.491  38.249  1.00  0.03
ATOM   1840  CG1 VAL   212      20.838  28.454  37.483  1.00  0.02
ATOM   1841  CG2 VAL   212      18.965  26.829  37.283  1.00  0.02
ATOM   1842  C   VAL   212      21.628  27.070  40.068  1.00  0.02
ATOM   1843  O   VAL   212      21.122  27.744  40.971  1.00  0.01
ATOM   1844  N   GLY   213      22.928  26.850  39.945  1.00  0.02
ATOM   1846  CA  GLY   213      23.892  27.290  40.962  1.00  0.01
ATOM   1847  C   GLY   213      24.267  26.189  41.966  1.00  0.01
ATOM   1848  O   GLY   213      24.890  26.485  42.993  1.00  0.02
ATOM   1849  N   CYS   214      23.899  24.948  41.687  1.00  0.02
ATOM   1851  CA  CYS   214      24.219  23.855  42.617  1.00  0.02
ATOM   1852  CB  CYS   214      23.422  22.611  42.239  1.00  0.02
ATOM   1853  SG  CYS   214      23.847  21.835  40.662  1.00  0.02
ATOM   1854  C   CYS   214      25.701  23.494  42.621  1.00  0.02
ATOM   1855  O   CYS   214      26.370  23.510  41.581  1.00  0.01
ATOM   1856  N   ASP   215      26.225  23.249  43.811  1.00  0.02
ATOM   1858  CA  ASP   215      27.573  22.678  43.916  1.00  0.01
ATOM   1859  CB  ASP   215      28.274  23.217  45.164  1.00  0.01
ATOM   1860  CG  ASP   215      29.669  22.600  45.301  1.00  0.02
ATOM   1861  OD1 ASP   215      30.593  23.175  44.749  1.00  0.02
ATOM   1862  OD2 ASP   215      29.749  21.474  45.790  1.00  0.75
ATOM   1863  C   ASP   215      27.453  21.161  43.997  1.00  0.02
ATOM   1864  O   ASP   215      27.154  20.629  45.074  1.00  0.03
ATOM   1865  N   PRO   216      27.909  20.474  42.960  1.00  0.01
ATOM   1866  CA  PRO   216      27.556  19.058  42.784  1.00  0.02
ATOM   1867  CB  PRO   216      28.040  18.706  41.409  1.00  0.02
ATOM   1868  CG  PRO   216      28.747  19.905  40.793  1.00  0.02
ATOM   1869  CD  PRO   216      28.617  21.033  41.803  1.00  0.02
ATOM   1870  C   PRO   216      28.174  18.109  43.818  1.00  0.02
ATOM   1871  O   PRO   216      27.473  17.200  44.277  1.00  0.02
ATOM   1872  N   ASP   217      29.282  18.515  44.419  1.00  0.01
ATOM   1874  CA  ASP   217      29.993  17.629  45.348  1.00  0.02
ATOM   1875  CB  ASP   217      31.418  18.138  45.562  1.00  0.01
ATOM   1876  CG  ASP   217      32.340  17.831  44.378  1.00  0.03
ATOM   1877  OD1 ASP   217      31.870  17.853  43.247  1.00  0.02
ATOM   1878  OD2 ASP   217      33.525  17.669  44.625  1.00  0.03
ATOM   1879  C   ASP   217      29.290  17.524  46.696  1.00  0.02
ATOM   1880  O   ASP   217      29.333  16.454  47.316  1.00  0.02
ATOM   1881  N   VAL   218      28.543  18.547  47.080  1.00  0.03
ATOM   1883  CA  VAL   218      27.771  18.452  48.322  1.00  0.01
ATOM   1884  CB  VAL   218      28.076  19.664  49.204  1.00  0.02
ATOM   1885  CG1 VAL   218      29.512  19.617  49.718  1.00  0.02
ATOM   1886  CG2 VAL   218      27.806  20.988  48.497  1.00  0.02
ATOM   1887  C   VAL   218      26.271  18.321  48.047  1.00  0.02
ATOM   1888  O   VAL   218      25.550  17.687  48.830  1.00  0.01
ATOM   1889  N   ALA   219      25.864  18.689  46.842  1.00  0.02
ATOM   1891  CA  ALA   219      24.444  18.660  46.492  1.00  0.01
ATOM   1892  CB  ALA   219      24.179  19.669  45.381  1.00  0.02
ATOM   1893  C   ALA   219      23.974  17.280  46.057  1.00  0.02
ATOM   1894  O   ALA   219      22.787  16.973  46.228  1.00  0.02
ATOM   1895  N   TRP   220      24.903  16.386  45.752  1.00  0.02
ATOM   1897  CA  TRP   220      24.504  15.024  45.396  1.00  0.02
ATOM   1898  CB  TRP   220      25.622  14.343  44.618  1.00  0.02
ATOM   1899  CG  TRP   220      25.349  14.214  43.130  1.00  0.02
ATOM   1900  CD1 TRP   220      25.352  13.042  42.406  1.00  0.02
ATOM   1901  NE1 TRP   220      25.059  13.329  41.114  1.00  0.02
ATOM   1903  CE2 TRP   220      24.855  14.649  40.945  1.00  0.02
ATOM   1904  CZ2 TRP   220      24.528  15.413  39.836  1.00  0.00
ATOM   1905  CH2 TRP   220      24.374  16.788  39.963  1.00  0.01
ATOM   1906  CZ3 TRP   220      24.543  17.400  41.200  1.00  0.02
ATOM   1907  CE3 TRP   220      24.868  16.642  42.316  1.00  0.02
ATOM   1908  CD2 TRP   220      25.026  15.268  42.196  1.00  0.02
ATOM   1909  C   TRP   220      24.118  14.201  46.620  1.00  0.02
ATOM   1910  O   TRP   220      23.193  13.389  46.507  1.00  0.01
ATOM   1911  N   GLN   221      24.559  14.607  47.801  1.00  0.02
ATOM   1913  CA  GLN   221      24.071  13.948  49.016  1.00  0.01
ATOM   1914  CB  GLN   221      25.017  14.244  50.179  1.00  0.01
ATOM   1915  CG  GLN   221      24.478  13.745  51.526  1.00  0.03
ATOM   1916  CD  GLN   221      24.463  12.218  51.609  1.00  0.03
ATOM   1917  OE1 GLN   221      24.644  11.528  50.602  1.00  0.02
ATOM   1918  NE2 GLN   221      24.301  11.702  52.813  1.00  0.02
ATOM   1921  C   GLN   221      22.673  14.436  49.375  1.00  0.01
ATOM   1922  O   GLN   221      21.796  13.618  49.681  1.00  0.01
ATOM   1923  N   GLU   222      22.398  15.692  49.070  1.00  0.02
ATOM   1925  CA  GLU   222      21.103  16.270  49.423  1.00  0.01
ATOM   1926  CB  GLU   222      21.230  17.785  49.360  1.00  0.03
ATOM   1927  CG  GLU   222      19.924  18.475  49.732  1.00  0.03
ATOM   1928  CD  GLU   222      20.109  19.982  49.614  1.00  0.02
ATOM   1929  OE1 GLU   222      19.460  20.700  50.360  1.00  0.57
ATOM   1930  OE2 GLU   222      20.939  20.383  48.809  1.00  0.30
ATOM   1931  C   GLU   222      20.009  15.805  48.471  1.00  0.03
ATOM   1932  O   GLU   222      18.979  15.291  48.930  1.00  0.02
ATOM   1933  N   PHE   223      20.329  15.753  47.187  1.00  0.00
ATOM   1935  CA  PHE   223      19.335  15.324  46.200  1.00  0.01
ATOM   1936  CB  PHE   223      19.765  15.758  44.800  1.00  0.02
ATOM   1937  CG  PHE   223      19.980  17.254  44.564  1.00  0.02
ATOM   1938  CD1 PHE   223      19.225  18.203  45.242  1.00  0.02
ATOM   1939  CE1 PHE   223      19.441  19.556  45.012  1.00  0.02
ATOM   1940  CZ  PHE   223      20.403  19.961  44.096  1.00  0.02
ATOM   1941  CE2 PHE   223      21.147  19.012  43.407  1.00  0.02
ATOM   1942  CD2 PHE   223      20.933  17.660  43.639  1.00  0.02
ATOM   1943  C   PHE   223      19.200  13.807  46.226  1.00  0.02
ATOM   1944  O   PHE   223      18.078  13.290  46.151  1.00  0.02
ATOM   1945  N   GLY   224      20.287  13.140  46.580  1.00  0.02
ATOM   1947  CA  GLY   224      20.295  11.687  46.732  1.00  0.02
ATOM   1948  C   GLY   224      19.352  11.252  47.840  1.00  0.01
ATOM   1949  O   GLY   224      18.356  10.574  47.561  1.00  0.02
ATOM   1950  N   THR   225      19.530  11.826  49.019  1.00  0.02
ATOM   1952  CA  THR   225      18.697  11.448  50.168  1.00  0.02
ATOM   1953  CB  THR   225      19.300  12.026  51.444  1.00  0.02
ATOM   1954  OG1 THR   225      19.410  13.438  51.299  1.00  0.03
ATOM   1955  CG2 THR   225      20.686  11.457  51.719  1.00  0.02
ATOM   1956  C   THR   225      17.246  11.917  50.061  1.00  0.01
ATOM   1957  O   THR   225      16.361  11.200  50.540  1.00  0.02
ATOM   1958  N   HIS   226      16.978  12.967  49.302  1.00  0.01
ATOM   1960  CA  HIS   226      15.591  13.405  49.158  1.00  0.03
ATOM   1961  CB  HIS   226      15.573  14.865  48.733  1.00  0.02
ATOM   1962  CG  HIS   226      14.174  15.436  48.640  1.00  0.02
ATOM   1963  ND1 HIS   226      13.143  15.166  49.464  1.00  0.01
ATOM   1965  CE1 HIS   226      12.062  15.868  49.067  1.00  0.01
ATOM   1966  NE2 HIS   226      12.415  16.581  47.973  1.00  0.02
ATOM   1967  CD2 HIS   226      13.713  16.322  47.696  1.00  0.01
ATOM   1968  C   HIS   226      14.848  12.568  48.123  1.00  0.01
ATOM   1969  O   HIS   226      13.787  12.007  48.424  1.00  0.03
ATOM   1970  N   PHE   227      15.505  12.279  47.014  1.00  0.02
ATOM   1972  CA  PHE   227      14.833  11.531  45.950  1.00  0.02
ATOM   1973  CB  PHE   227      15.459  11.890  44.612  1.00  0.01
ATOM   1974  CG  PHE   227      15.266  13.349  44.198  1.00  0.02
ATOM   1975  CD1 PHE   227      16.316  14.049  43.620  1.00  0.02
ATOM   1976  CE1 PHE   227      16.143  15.372  43.240  1.00  0.01
ATOM   1977  CZ  PHE   227      14.919  15.998  43.435  1.00  0.01
ATOM   1978  CE2 PHE   227      13.870  15.300  44.018  1.00  0.01
ATOM   1979  CD2 PHE   227      14.045  13.978  44.402  1.00  0.02
ATOM   1980  C   PHE   227      14.866  10.023  46.189  1.00  0.03
ATOM   1981  O   PHE   227      14.017   9.305  45.651  1.00  0.03
ATOM   1982  N   SER   228      15.652   9.593  47.164  1.00  0.02
ATOM   1984  CA  SER   228      15.620   8.195  47.621  1.00  0.02
ATOM   1985  CB  SER   228      16.943   7.836  48.286  1.00  0.02
ATOM   1986  OG  SER   228      17.086   8.639  49.448  1.00  0.19
ATOM   1987  C   SER   228      14.480   7.929  48.610  1.00  0.01
ATOM   1988  O   SER   228      14.373   6.816  49.136  1.00  0.03
ATOM   1989  N   GLN   229      13.685   8.948  48.907  1.00  0.01
ATOM   1991  CA  GLN   229      12.454   8.752  49.672  1.00  0.01
ATOM   1992  CB  GLN   229      12.171  10.032  50.449  1.00  0.02
ATOM   1993  CG  GLN   229      13.378  10.455  51.276  1.00  0.01
ATOM   1994  CD  GLN   229      13.104  11.782  51.977  1.00  0.02
ATOM   1995  OE1 GLN   229      13.188  12.864  51.380  1.00  0.00
ATOM   1996  NE2 GLN   229      12.795  11.679  53.258  1.00  0.03
ATOM   1999  C   GLN   229      11.280   8.480  48.730  1.00  0.02
ATOM   2000  O   GLN   229      10.204   8.061  49.174  1.00  0.02
ATOM   2001  N   TYR   230      11.509   8.686  47.442  1.00  0.02
ATOM   2003  CA  TYR   230      10.458   8.517  46.440  1.00  0.02
ATOM   2004  CB  TYR   230      10.541   9.660  45.438  1.00  0.02
ATOM   2005  CG  TYR   230      10.227  11.021  46.051  1.00  0.02
ATOM   2006  CD1 TYR   230      11.253  11.858  46.471  1.00  0.02
ATOM   2007  CE1 TYR   230      10.957  13.090  47.033  1.00  0.01
ATOM   2008  CZ  TYR   230       9.634  13.487  47.167  1.00  0.02
ATOM   2009  OH  TYR   230       9.344  14.746  47.640  1.00  0.02
ATOM   2010  CE2 TYR   230       8.606  12.656  46.747  1.00  0.02
ATOM   2011  CD2 TYR   230       8.905  11.421  46.189  1.00  0.01
ATOM   2012  C   TYR   230      10.551   7.176  45.726  1.00  0.01
ATOM   2013  O   TYR   230      11.630   6.594  45.567  1.00  0.01
ATOM   2014  N   ARG   231       9.398   6.718  45.271  1.00  0.02
ATOM   2016  CA  ARG   231       9.299   5.421  44.590  1.00  0.02
ATOM   2017  CB  ARG   231       7.896   4.889  44.841  1.00  0.02
ATOM   2018  CG  ARG   231       7.561   4.822  46.325  1.00  0.01
ATOM   2019  CD  ARG   231       6.108   4.406  46.527  1.00  0.01
ATOM   2020  NE  ARG   231       5.842   3.106  45.889  1.00  0.02
ATOM   2021  CZ  ARG   231       4.923   2.925  44.937  1.00  0.02
ATOM   2022  NH1 ARG   231       4.200   3.959  44.500  1.00  0.02
ATOM   2023  NH2 ARG   231       4.742   1.714  44.407  1.00  0.01
ATOM   2024  C   ARG   231       9.481   5.534  43.079  1.00  0.01
ATOM   2025  O   ARG   231       9.646   4.525  42.382  1.00  0.01
ATOM   2026  N   ASN   232       9.357   6.746  42.570  1.00  0.02
ATOM   2028  CA  ASN   232       9.442   6.965  41.126  1.00  0.01
ATOM   2029  CB  ASN   232       8.035   7.196  40.597  1.00  0.02
ATOM   2030  CG  ASN   232       7.240   5.897  40.559  1.00  0.01
ATOM   2031  OD1 ASN   232       7.564   4.989  39.785  1.00  0.02
ATOM   2032  ND2 ASN   232       6.168   5.858  41.328  1.00  0.00
ATOM   2035  C   ASN   232      10.298   8.170  40.776  1.00  0.01
ATOM   2036  O   ASN   232       9.780   9.275  40.575  1.00  0.02
ATOM   2037  N   VAL   233      11.594   7.938  40.680  1.00  0.01
ATOM   2039  CA  VAL   233      12.543   8.979  40.281  1.00  0.02
ATOM   2040  CB  VAL   233      13.792   8.829  41.140  1.00  0.02
ATOM   2041  CG1 VAL   233      14.742  10.003  40.938  1.00  0.02
ATOM   2042  CG2 VAL   233      13.418   8.705  42.611  1.00  0.02
ATOM   2043  C   VAL   233      12.900   8.820  38.803  1.00  0.01
ATOM   2044  O   VAL   233      13.814   8.072  38.436  1.00  0.02
ATOM   2045  N   TRP   234      12.152   9.514  37.967  1.00  0.01
ATOM   2047  CA  TRP   234      12.342   9.425  36.519  1.00  0.02
ATOM   2048  CB  TRP   234      11.019   9.687  35.814  1.00  0.02
ATOM   2049  CG  TRP   234       9.887   8.741  36.153  1.00  0.02
ATOM   2050  CD1 TRP   234       9.735   7.437  35.738  1.00  0.01
ATOM   2051  NE1 TRP   234       8.558   6.966  36.221  1.00  0.01
ATOM   2053  CE2 TRP   234       7.920   7.906  36.949  1.00  0.02
ATOM   2054  CZ2 TRP   234       6.682   7.941  37.567  1.00  0.01
ATOM   2055  CH2 TRP   234       6.287   9.080  38.258  1.00  0.02
ATOM   2056  CZ3 TRP   234       7.120  10.193  38.317  1.00  0.01
ATOM   2057  CE3 TRP   234       8.350  10.177  37.676  1.00  0.02
ATOM   2058  CD2 TRP   234       8.747   9.043  36.982  1.00  0.02
ATOM   2059  C   TRP   234      13.349  10.445  36.009  1.00  0.01
ATOM   2060  O   TRP   234      13.319  11.629  36.369  1.00  0.02
ATOM   2061  N   ALA   235      14.243   9.962  35.168  1.00  0.02
ATOM   2063  CA  ALA   235      15.170  10.845  34.457  1.00  0.02
ATOM   2064  CB  ALA   235      16.533  10.174  34.407  1.00  0.01
ATOM   2065  C   ALA   235      14.645  11.104  33.046  1.00  0.01
ATOM   2066  O   ALA   235      14.569  10.185  32.216  1.00  0.01
ATOM   2067  N   ILE   236      14.270  12.349  32.800  1.00  0.02
ATOM   2069  CA  ILE   236      13.623  12.714  31.532  1.00  0.01
ATOM   2070  CB  ILE   236      12.200  13.167  31.862  1.00  0.01
ATOM   2071  CG2 ILE   236      12.166  14.054  33.097  1.00  0.02
ATOM   2072  CG1 ILE   236      11.489  13.836  30.691  1.00  0.01
ATOM   2073  CD1 ILE   236      10.088  14.272  31.105  1.00  0.74
ATOM   2074  C   ILE   236      14.402  13.767  30.735  1.00  0.01
ATOM   2075  O   ILE   236      14.696  14.877  31.204  1.00  0.01
ATOM   2076  N   ASP   237      14.723  13.387  29.508  1.00  0.01
ATOM   2078  CA  ASP   237      15.472  14.252  28.586  1.00  0.01
ATOM   2079  CB  ASP   237      16.442  13.394  27.777  1.00  0.02
ATOM   2080  CG  ASP   237      17.385  12.597  28.675  1.00  0.01
ATOM   2081  OD1 ASP   237      17.732  11.491  28.289  1.00  0.01
ATOM   2082  OD2 ASP   237      17.753  13.107  29.724  1.00  0.02
ATOM   2083  C   ASP   237      14.527  14.957  27.614  1.00  0.02
ATOM   2084  O   ASP   237      13.724  14.310  26.930  1.00  0.01
ATOM   2085  N   TYR   238      14.642  16.272  27.548  1.00  0.00
ATOM   2087  CA  TYR   238      13.791  17.063  26.646  1.00  0.01
ATOM   2088  CB  TYR   238      13.405  18.357  27.350  1.00  0.02
ATOM   2089  CG  TYR   238      12.403  18.207  28.491  1.00  0.01
ATOM   2090  CD1 TYR   238      11.059  18.463  28.253  1.00  0.01
ATOM   2091  CE1 TYR   238      10.136  18.337  29.283  1.00  0.01
ATOM   2092  CZ  TYR   238      10.563  17.957  30.547  1.00  0.01
ATOM   2093  OH  TYR   238       9.653  17.847  31.574  1.00  0.01
ATOM   2094  CE2 TYR   238      11.906  17.710  30.791  1.00  0.01
ATOM   2095  CD2 TYR   238      12.828  17.844  29.763  1.00  0.01
ATOM   2096  C   TYR   238      14.496  17.397  25.334  1.00  0.01
ATOM   2097  O   TYR   238      15.471  18.161  25.312  1.00  0.01
ATOM   2098  N   THR   239      13.946  16.885  24.245  1.00  0.01
ATOM   2100  CA  THR   239      14.560  17.095  22.927  1.00  0.01
ATOM   2101  CB  THR   239      13.981  16.110  21.916  1.00  0.01
ATOM   2102  OG1 THR   239      12.600  16.383  21.738  1.00  0.23
ATOM   2103  CG2 THR   239      14.132  14.670  22.391  1.00  0.28
ATOM   2104  C   THR   239      14.371  18.527  22.435  1.00  0.01
ATOM   2105  O   THR   239      13.248  19.032  22.303  1.00  0.01
ATOM   2106  N   ALA   240      15.514  19.153  22.186  1.00  0.01
ATOM   2108  CA  ALA   240      15.620  20.550  21.734  1.00  0.01
ATOM   2109  CB  ALA   240      15.202  20.637  20.270  1.00  0.01
ATOM   2110  C   ALA   240      14.783  21.499  22.583  1.00  0.01
ATOM   2111  O   ALA   240      14.144  22.414  22.047  1.00  0.01
ATOM   2112  N   PHE   241      15.011  21.440  23.886  1.00  0.01
ATOM   2114  CA  PHE   241      14.173  22.152  24.858  1.00  0.01
ATOM   2115  CB  PHE   241      14.684  21.752  26.236  1.00  0.02
ATOM   2116  CG  PHE   241      13.890  22.269  27.431  1.00  0.01
ATOM   2117  CD1 PHE   241      12.680  21.682  27.768  1.00  0.01
ATOM   2118  CE1 PHE   241      11.958  22.147  28.857  1.00  0.02
ATOM   2119  CZ  PHE   241      12.453  23.197  29.616  1.00  0.01
ATOM   2120  CE2 PHE   241      13.671  23.774  29.289  1.00  0.02
ATOM   2121  CD2 PHE   241      14.392  23.308  28.200  1.00  0.02
ATOM   2122  C   PHE   241      14.216  23.671  24.685  1.00  0.01
ATOM   2123  O   PHE   241      13.163  24.279  24.457  1.00  0.01
ATOM   2124  N   ASP   242      15.401  24.186  24.397  1.00  0.01
ATOM   2126  CA  ASP   242      15.586  25.631  24.223  1.00  0.01
ATOM   2127  CB  ASP   242      17.084  25.916  24.128  1.00  0.02
ATOM   2128  CG  ASP   242      17.827  25.637  25.434  1.00  0.02
ATOM   2129  OD1 ASP   242      18.132  24.475  25.674  1.00  0.01
ATOM   2130  OD2 ASP   242      18.302  26.607  26.012  1.00  0.01
ATOM   2131  C   ASP   242      14.909  26.184  22.966  1.00  0.01
ATOM   2132  O   ASP   242      14.307  27.260  23.043  1.00  0.01
ATOM   2133  N   SER   243      14.774  25.367  21.934  1.00  0.01
ATOM   2135  CA  SER   243      14.219  25.854  20.666  1.00  0.01
ATOM   2136  CB  SER   243      15.006  25.238  19.514  1.00  0.01
ATOM   2137  OG  SER   243      14.737  23.841  19.496  1.00  1.26
ATOM   2138  C   SER   243      12.745  25.487  20.497  1.00  0.01
ATOM   2139  O   SER   243      12.096  25.951  19.553  1.00  0.01
ATOM   2140  N   CYS   244      12.235  24.652  21.388  1.00  0.01
ATOM   2142  CA  CYS   244      10.824  24.267  21.322  1.00  0.01
ATOM   2143  CB  CYS   244      10.694  22.794  21.671  1.00  0.01
ATOM   2144  SG  CYS   244      11.414  21.642  20.478  1.00  0.13
ATOM   2145  C   CYS   244       9.944  25.112  22.238  1.00  0.01
ATOM   2146  O   CYS   244       8.723  24.913  22.291  1.00  0.01
ATOM   2147  N   HIS   245      10.567  26.007  22.989  1.00  0.01
ATOM   2149  CA  HIS   245       9.810  27.002  23.759  1.00  0.01
ATOM   2150  CB  HIS   245      10.788  27.877  24.528  1.00  0.01
ATOM   2151  CG  HIS   245      11.539  27.181  25.634  1.00  0.01
ATOM   2152  ND1 HIS   245      11.013  26.363  26.562  1.00  0.01
ATOM   2154  CE1 HIS   245      11.991  25.939  27.384  1.00  0.01
ATOM   2155  NE2 HIS   245      13.146  26.508  26.975  1.00  0.01
ATOM   2156  CD2 HIS   245      12.881  27.281  25.899  1.00  0.02
ATOM   2157  C   HIS   245       9.022  27.917  22.836  1.00  0.01
ATOM   2158  O   HIS   245       9.610  28.746  22.136  1.00  0.02
ATOM   2159  N   SER   246       7.706  27.814  22.882  1.00  0.01
ATOM   2161  CA  SER   246       6.886  28.702  22.057  1.00  0.01
ATOM   2162  CB  SER   246       5.449  28.197  22.022  1.00  0.01
ATOM   2163  OG  SER   246       4.749  28.790  23.102  1.00  0.05
ATOM   2164  C   SER   246       6.914  30.110  22.633  1.00  0.01
ATOM   2165  O   SER   246       7.049  30.285  23.850  1.00  0.02
ATOM   2166  N   THR   247       6.625  31.086  21.788  1.00  0.01
ATOM   2168  CA  THR   247       6.611  32.499  22.204  1.00  0.01
ATOM   2169  CB  THR   247       6.391  33.349  20.953  1.00  0.02
ATOM   2170  OG1 THR   247       7.562  33.291  20.162  1.00  0.38
ATOM   2171  CG2 THR   247       6.125  34.812  21.280  1.00  0.30
ATOM   2172  C   THR   247       5.466  32.770  23.176  1.00  0.01
ATOM   2173  O   THR   247       5.656  33.435  24.203  1.00  0.02
ATOM   2174  N   GLN   248       4.417  31.987  23.005  1.00  0.02
ATOM   2176  CA  GLN   248       3.214  32.072  23.830  1.00  0.00
ATOM   2177  CB  GLN   248       2.101  31.240  23.176  1.00  0.01
ATOM   2178  CG  GLN   248       1.585  31.777  21.824  1.00  0.01
ATOM   2179  CD  GLN   248       2.527  31.495  20.643  1.00  1.22
ATOM   2180  OE1 GLN   248       3.153  32.413  20.097  1.00  1.81
ATOM   2181  NE2 GLN   248       2.770  30.223  20.399  1.00  2.21
ATOM   2184  C   GLN   248       3.481  31.568  25.252  1.00  0.01
ATOM   2185  O   GLN   248       3.190  32.287  26.217  1.00  0.01
ATOM   2186  N   LEU   249       4.224  30.476  25.371  1.00  0.02
ATOM   2188  CA  LEU   249       4.579  29.949  26.697  1.00  0.02
ATOM   2189  CB  LEU   249       5.138  28.544  26.531  1.00  0.02
ATOM   2190  CG  LEU   249       4.119  27.599  25.910  1.00  0.38
ATOM   2191  CD1 LEU   249       4.762  26.269  25.534  1.00  0.23
ATOM   2192  CD2 LEU   249       2.913  27.392  26.819  1.00  0.26
ATOM   2193  C   LEU   249       5.623  30.804  27.412  1.00  0.01
ATOM   2194  O   LEU   249       5.494  31.030  28.622  1.00  0.01
ATOM   2195  N   MET   250       6.481  31.458  26.647  1.00  0.02
ATOM   2197  CA  MET   250       7.484  32.340  27.245  1.00  0.01
ATOM   2198  CB  MET   250       8.531  32.639  26.182  1.00  0.02
ATOM   2199  CG  MET   250       9.257  31.376  25.735  1.00  0.02
ATOM   2200  SD  MET   250      10.210  31.530  24.204  1.00  0.01
ATOM   2201  CE  MET   250      11.236  32.953  24.629  1.00  0.02
ATOM   2202  C   MET   250       6.850  33.643  27.727  1.00  0.01
ATOM   2203  O   MET   250       7.148  34.092  28.843  1.00  0.02
ATOM   2204  N   SER   251       5.807  34.077  27.038  1.00  0.02
ATOM   2206  CA  SER   251       5.102  35.291  27.444  1.00  0.02
ATOM   2207  CB  SER   251       4.236  35.795  26.300  1.00  0.02
ATOM   2208  OG  SER   251       3.475  36.881  26.816  1.00  1.19
ATOM   2209  C   SER   251       4.213  35.062  28.654  1.00  0.02
ATOM   2210  O   SER   251       4.294  35.856  29.598  1.00  0.02
ATOM   2211  N   VAL   252       3.585  33.901  28.759  1.00  0.02
ATOM   2213  CA  VAL   252       2.742  33.662  29.936  1.00  0.02
ATOM   2214  CB  VAL   252       1.676  32.610  29.627  1.00  0.01
ATOM   2215  CG1 VAL   252       0.736  33.094  28.530  1.00  0.02
ATOM   2216  CG2 VAL   252       2.270  31.263  29.248  1.00  0.02
ATOM   2217  C   VAL   252       3.572  33.281  31.164  1.00  0.02
ATOM   2218  O   VAL   252       3.186  33.656  32.279  1.00  0.02
ATOM   2219  N   MET   253       4.804  32.841  30.948  1.00  0.02
ATOM   2221  CA  MET   253       5.720  32.620  32.067  1.00  0.02
ATOM   2222  CB  MET   253       6.853  31.712  31.588  1.00  0.02
ATOM   2223  CG  MET   253       7.877  31.367  32.670  1.00  0.01
ATOM   2224  SD  MET   253       9.186  32.577  32.980  1.00  0.01
ATOM   2225  CE  MET   253       9.936  32.601  31.336  1.00  0.02
ATOM   2226  C   MET   253       6.253  33.960  32.562  1.00  0.02
ATOM   2227  O   MET   253       6.198  34.219  33.773  1.00  0.02
ATOM   2228  N   ALA   254       6.456  34.890  31.642  1.00  0.01
ATOM   2230  CA  ALA   254       6.886  36.238  32.022  1.00  0.02
ATOM   2231  CB  ALA   254       7.271  37.003  30.762  1.00  0.01
ATOM   2232  C   ALA   254       5.775  36.988  32.749  1.00  0.03
ATOM   2233  O   ALA   254       6.025  37.504  33.847  1.00  0.02
ATOM   2234  N   ASP   255       4.543  36.715  32.346  1.00  0.01
ATOM   2236  CA  ASP   255       3.361  37.322  32.970  1.00  0.01
ATOM   2237  CB  ASP   255       2.134  36.977  32.126  1.00  0.02
ATOM   2238  CG  ASP   255       2.222  37.550  30.715  1.00  0.02
ATOM   2239  OD1 ASP   255       1.654  36.941  29.815  1.00  0.21
ATOM   2240  OD2 ASP   255       2.771  38.633  30.574  1.00  0.31
ATOM   2241  C   ASP   255       3.089  36.811  34.383  1.00  0.02
ATOM   2242  O   ASP   255       2.473  37.525  35.181  1.00  0.02
ATOM   2243  N   GLU   256       3.610  35.647  34.738  1.00  0.02
ATOM   2245  CA  GLU   256       3.332  35.138  36.079  1.00  0.02
ATOM   2246  CB  GLU   256       2.925  33.672  35.995  1.00  0.03
ATOM   2247  CG  GLU   256       1.761  33.435  35.037  1.00  0.02
ATOM   2248  CD  GLU   256       0.551  34.291  35.391  1.00  0.02
ATOM   2249  OE1 GLU   256       0.231  35.141  34.569  1.00  0.02
ATOM   2250  OE2 GLU   256      -0.174  33.896  36.291  1.00  0.03
ATOM   2251  C   GLU   256       4.530  35.258  37.013  1.00  0.02
ATOM   2252  O   GLU   256       4.338  35.418  38.221  1.00  0.02
ATOM   2253  N   VAL   257       5.736  35.230  36.471  1.00  0.01
ATOM   2255  CA  VAL   257       6.925  35.209  37.330  1.00  0.02
ATOM   2256  CB  VAL   257       7.908  34.204  36.730  1.00  0.01
ATOM   2257  CG1 VAL   257       9.199  34.114  37.538  1.00  0.03
ATOM   2258  CG2 VAL   257       7.273  32.824  36.600  1.00  0.02
ATOM   2259  C   VAL   257       7.599  36.574  37.468  1.00  0.03
ATOM   2260  O   VAL   257       8.174  36.870  38.521  1.00  0.00
ATOM   2261  N   PHE   258       7.397  37.449  36.498  1.00  0.03
ATOM   2263  CA  PHE   258       8.109  38.733  36.498  1.00  0.02
ATOM   2264  CB  PHE   258       8.761  38.943  35.138  1.00  0.02
ATOM   2265  CG  PHE   258       9.887  37.949  34.868  1.00  0.02
ATOM   2266  CD1 PHE   258       9.668  36.833  34.071  1.00  0.02
ATOM   2267  CE1 PHE   258      10.694  35.926  33.846  1.00  0.01
ATOM   2268  CZ  PHE   258      11.944  36.136  34.415  1.00  0.02
ATOM   2269  CE2 PHE   258      12.164  37.255  35.207  1.00  0.03
ATOM   2270  CD2 PHE   258      11.137  38.161  35.433  1.00  0.01
ATOM   2271  C   PHE   258       7.226  39.917  36.875  1.00  0.01
ATOM   2272  O   PHE   258       7.486  41.053  36.458  1.00  0.02
ATOM   2273  N   SER   259       6.222  39.652  37.692  1.00  0.02
ATOM   2275  CA  SER   259       5.293  40.692  38.143  1.00  0.02
ATOM   2276  CB  SER   259       4.141  40.000  38.871  1.00  0.03
ATOM   2277  OG  SER   259       3.316  40.997  39.466  1.00  0.94
ATOM   2278  C   SER   259       5.949  41.693  39.092  1.00  0.02
ATOM   2279  O   SER   259       6.715  41.312  39.985  1.00  0.02
ATOM   2280  N   ASP   260       5.454  42.921  39.050  1.00  0.03
ATOM   2282  CA  ASP   260       5.880  43.947  40.010  1.00  0.02
ATOM   2283  CB  ASP   260       5.362  45.313  39.570  1.00  0.03
ATOM   2284  CG  ASP   260       6.073  45.828  38.318  1.00  0.31
ATOM   2285  OD1 ASP   260       6.707  46.869  38.438  1.00  0.95
ATOM   2286  OD2 ASP   260       5.665  45.406  37.246  1.00  0.77
ATOM   2287  C   ASP   260       5.392  43.682  41.442  1.00  0.02
ATOM   2288  O   ASP   260       6.049  44.155  42.376  1.00  0.03
ATOM   2289  N   ALA   261       4.480  42.734  41.640  1.00  0.02
ATOM   2291  CA  ALA   261       4.052  42.377  43.000  1.00  0.02
ATOM   2292  CB  ALA   261       2.662  41.755  42.927  1.00  0.02
ATOM   2293  C   ALA   261       5.026  41.394  43.660  1.00  0.02
ATOM   2294  O   ALA   261       4.909  41.095  44.853  1.00  0.02
ATOM   2295  N   TYR   262       5.990  40.924  42.881  1.00  0.02
ATOM   2297  CA  TYR   262       7.097  40.117  43.392  1.00  0.02
ATOM   2298  CB  TYR   262       7.395  38.996  42.410  1.00  0.02
ATOM   2299  CG  TYR   262       6.320  37.923  42.295  1.00  0.03
ATOM   2300  CD1 TYR   262       5.683  37.441  43.433  1.00  0.02
ATOM   2301  CE1 TYR   262       4.722  36.443  43.320  1.00  0.02
ATOM   2302  CZ  TYR   262       4.404  35.932  42.069  1.00  0.02
ATOM   2303  OH  TYR   262       3.559  34.848  41.965  1.00  0.05
ATOM   2304  CE2 TYR   262       5.029  36.424  40.933  1.00  0.02
ATOM   2305  CD2 TYR   262       5.989  37.419  41.045  1.00  0.01
ATOM   2306  C   TYR   262       8.359  40.961  43.575  1.00  0.02
ATOM   2307  O   TYR   262       9.463  40.405  43.665  1.00  0.02
ATOM   2308  N   GLY   263       8.220  42.270  43.430  1.00  0.02
ATOM   2310  CA  GLY   263       9.341  43.189  43.641  1.00  0.02
ATOM   2311  C   GLY   263      10.091  43.491  42.349  1.00  0.02
ATOM   2312  O   GLY   263      11.182  44.068  42.390  1.00  0.02
ATOM   2313  N   PHE   264       9.532  43.065  41.227  1.00  0.02
ATOM   2315  CA  PHE   264      10.208  43.239  39.938  1.00  0.02
ATOM   2316  CB  PHE   264       9.750  42.175  38.952  1.00  0.02
ATOM   2317  CG  PHE   264      10.409  40.818  39.136  1.00  0.02
ATOM   2318  CD1 PHE   264       9.780  39.831  39.879  1.00  0.02
ATOM   2319  CE1 PHE   264      10.387  38.595  40.039  1.00  0.02
ATOM   2320  CZ  PHE   264      11.620  38.345  39.453  1.00  0.02
ATOM   2321  CE2 PHE   264      12.248  39.332  38.706  1.00  0.02
ATOM   2322  CD2 PHE   264      11.641  40.569  38.546  1.00  0.02
ATOM   2323  C   PHE   264       9.951  44.588  39.303  1.00  0.02
ATOM   2324  O   PHE   264       8.863  45.167  39.416  1.00  0.03
ATOM   2325  N   ASP   265      10.963  45.037  38.581  1.00  0.03
ATOM   2327  CA  ASP   265      10.850  46.228  37.737  1.00  0.03
ATOM   2328  CB  ASP   265      12.239  46.485  37.147  1.00  0.02
ATOM   2329  CG  ASP   265      12.301  47.818  36.411  1.00  0.03
ATOM   2330  OD1 ASP   265      12.494  48.823  37.075  1.00  0.49
ATOM   2331  OD2 ASP   265      11.975  47.818  35.230  1.00  0.24
ATOM   2332  C   ASP   265       9.828  45.942  36.634  1.00  0.02
ATOM   2333  O   ASP   265       9.736  44.801  36.163  1.00  0.02
ATOM   2334  N   GLU   266       9.112  46.959  36.174  1.00  0.01
ATOM   2336  CA  GLU   266       8.065  46.768  35.149  1.00  0.02
ATOM   2337  CB  GLU   266       7.374  48.101  34.839  1.00  0.02
ATOM   2338  CG  GLU   266       6.369  48.573  35.894  1.00  0.01
ATOM   2339  CD  GLU   266       7.004  49.459  36.968  1.00  0.01
ATOM   2340  OE1 GLU   266       8.223  49.590  36.947  1.00  0.42
ATOM   2341  OE2 GLU   266       6.254  50.110  37.682  1.00  0.48
ATOM   2342  C   GLU   266       8.614  46.221  33.830  1.00  0.01
ATOM   2343  O   GLU   266       8.071  45.249  33.290  1.00  0.01
ATOM   2344  N   ARG   267       9.825  46.635  33.495  1.00  0.02
ATOM   2346  CA  ARG   267      10.470  46.198  32.260  1.00  0.00
ATOM   2347  CB  ARG   267      11.443  47.289  31.847  1.00  0.02
ATOM   2348  CG  ARG   267      10.731  48.631  31.753  1.00  0.03
ATOM   2349  CD  ARG   267      11.697  49.753  31.401  1.00  0.21
ATOM   2350  NE  ARG   267      12.782  49.832  32.391  1.00  0.34
ATOM   2351  CZ  ARG   267      12.851  50.764  33.344  1.00  0.50
ATOM   2352  NH1 ARG   267      13.860  50.749  34.217  1.00  0.75
ATOM   2353  NH2 ARG   267      11.905  51.702  33.432  1.00  0.46
ATOM   2354  C   ARG   267      11.190  44.849  32.379  1.00  0.02
ATOM   2355  O   ARG   267      11.734  44.376  31.375  1.00  0.03
ATOM   2356  N   ALA   268      11.053  44.160  33.504  1.00  0.01
ATOM   2358  CA  ALA   268      11.655  42.829  33.638  1.00  0.03
ATOM   2359  CB  ALA   268      11.585  42.397  35.100  1.00  0.02
ATOM   2360  C   ALA   268      10.892  41.826  32.785  1.00  0.03
ATOM   2361  O   ALA   268      11.501  41.111  31.977  1.00  0.02
ATOM   2362  N   ARG   269       9.585  42.025  32.726  1.00  0.03
ATOM   2364  CA  ARG   269       8.737  41.197  31.872  1.00  0.01
ATOM   2365  CB  ARG   269       7.323  41.299  32.426  1.00  0.02
ATOM   2366  CG  ARG   269       6.290  40.654  31.518  1.00  0.01
ATOM   2367  CD  ARG   269       4.945  40.563  32.222  1.00  0.02
ATOM   2368  NE  ARG   269       4.613  41.825  32.896  1.00  0.55
ATOM   2369  CZ  ARG   269       4.149  41.857  34.146  1.00  0.48
ATOM   2370  NH1 ARG   269       3.995  43.025  34.774  1.00  1.15
ATOM   2371  NH2 ARG   269       3.952  40.714  34.807  1.00  0.68
ATOM   2372  C   ARG   269       8.805  41.636  30.406  1.00  0.02
ATOM   2373  O   ARG   269       8.779  40.774  29.519  1.00  0.02
ATOM   2374  N   TYR   270       9.223  42.873  30.177  1.00  0.01
ATOM   2376  CA  TYR   270       9.420  43.363  28.808  1.00  0.01
ATOM   2377  CB  TYR   270       9.477  44.890  28.821  1.00  0.02
ATOM   2378  CG  TYR   270       9.995  45.512  27.523  1.00  0.02
ATOM   2379  CD1 TYR   270       9.215  45.484  26.373  1.00  0.02
ATOM   2380  CE1 TYR   270       9.696  46.039  25.193  1.00  0.07
ATOM   2381  CZ  TYR   270      10.957  46.622  25.167  1.00  0.04
ATOM   2382  OH  TYR   270      11.416  47.219  24.011  1.00  0.10
ATOM   2383  CE2 TYR   270      11.739  46.651  26.315  1.00  0.01
ATOM   2384  CD2 TYR   270      11.257  46.096  27.493  1.00  0.02
ATOM   2385  C   TYR   270      10.712  42.816  28.202  1.00  0.02
ATOM   2386  O   TYR   270      10.716  42.448  27.021  1.00  0.00
ATOM   2387  N   ALA   271      11.697  42.534  29.038  1.00  0.01
ATOM   2389  CA  ALA   271      12.933  41.939  28.532  1.00  0.02
ATOM   2390  CB  ALA   271      14.015  42.061  29.596  1.00  0.02
ATOM   2391  C   ALA   271      12.725  40.472  28.183  1.00  0.02
ATOM   2392  O   ALA   271      13.144  40.041  27.103  1.00  0.01
ATOM   2393  N   VAL   272      11.845  39.810  28.917  1.00  0.02
ATOM   2395  CA  VAL   272      11.559  38.407  28.614  1.00  0.01
ATOM   2396  CB  VAL   272      10.933  37.766  29.845  1.00  0.01
ATOM   2397  CG1 VAL   272      10.684  36.279  29.617  1.00  0.10
ATOM   2398  CG2 VAL   272      11.835  37.968  31.056  1.00  0.12
ATOM   2399  C   VAL   272      10.630  38.273  27.406  1.00  0.01
ATOM   2400  O   VAL   272      10.873  37.406  26.557  1.00  0.01
ATOM   2401  N   LYS   273       9.795  39.275  27.179  1.00  0.02
ATOM   2403  CA  LYS   273       8.942  39.275  25.985  1.00  0.02
ATOM   2404  CB  LYS   273       7.784  40.237  26.199  1.00  0.00
ATOM   2405  CG  LYS   273       6.787  39.702  27.216  1.00  0.01
ATOM   2406  CD  LYS   273       5.656  40.700  27.420  1.00  0.01
ATOM   2407  CE  LYS   273       4.578  40.145  28.340  1.00  0.02
ATOM   2408  NZ  LYS   273       3.532  41.152  28.579  1.00  0.02
ATOM   2409  C   LYS   273       9.694  39.687  24.722  1.00  0.02
ATOM   2410  O   LYS   273       9.426  39.136  23.647  1.00  0.02
ATOM   2411  N   SER   274      10.759  40.457  24.877  1.00  0.02
ATOM   2413  CA  SER   274      11.573  40.810  23.710  1.00  0.02
ATOM   2414  CB  SER   274      12.313  42.120  23.968  1.00  0.02
ATOM   2415  OG  SER   274      13.179  41.948  25.079  1.00  0.21
ATOM   2416  C   SER   274      12.547  39.685  23.356  1.00  0.02
ATOM   2417  O   SER   274      12.875  39.516  22.175  1.00  0.01
ATOM   2418  N   LEU   275      12.741  38.763  24.289  1.00  0.01
ATOM   2420  CA  LEU   275      13.505  37.539  24.014  1.00  0.02
ATOM   2421  CB  LEU   275      13.985  36.940  25.331  1.00  0.01
ATOM   2422  CG  LEU   275      14.989  37.842  26.036  1.00  0.01
ATOM   2423  CD1 LEU   275      15.317  37.312  27.427  1.00  0.02
ATOM   2424  CD2 LEU   275      16.253  38.013  25.205  1.00  0.02
ATOM   2425  C   LEU   275      12.673  36.484  23.277  1.00  0.01
ATOM   2426  O   LEU   275      13.226  35.470  22.836  1.00  0.01
ATOM   2427  N   CYS   276      11.390  36.748  23.074  1.00  0.02
ATOM   2429  CA  CYS   276      10.537  35.826  22.323  1.00  0.02
ATOM   2430  CB  CYS   276       9.100  36.007  22.798  1.00  0.01
ATOM   2431  SG  CYS   276       8.799  35.792  24.566  1.00  0.15
ATOM   2432  C   CYS   276      10.575  36.100  20.820  1.00  0.02
ATOM   2433  O   CYS   276      10.126  35.253  20.036  1.00  0.02
ATOM   2434  N   LYS   277      11.108  37.250  20.428  1.00  0.02
ATOM   2436  CA  LYS   277      11.190  37.625  19.008  1.00  0.02
ATOM   2437  CB  LYS   277      10.111  38.660  18.698  1.00  0.02
ATOM   2438  CG  LYS   277       8.704  38.106  18.901  1.00  0.01
ATOM   2439  CD  LYS   277       7.637  39.113  18.492  1.00  0.13
ATOM   2440  CE  LYS   277       6.240  38.524  18.645  1.00  0.16
ATOM   2441  NZ  LYS   277       5.213  39.490  18.222  1.00  0.79
ATOM   2442  C   LYS   277      12.559  38.226  18.691  1.00  0.01
ATOM   2443  O   LYS   277      12.706  39.450  18.586  1.00  0.02
ATOM   2444  N   THR   278      13.525  37.357  18.449  1.00  0.02
ATOM   2446  CA  THR   278      14.917  37.810  18.285  1.00  0.01
ATOM   2447  CB  THR   278      15.818  36.938  19.151  1.00  0.02
ATOM   2448  OG1 THR   278      15.692  35.590  18.721  1.00  0.02
ATOM   2449  CG2 THR   278      15.416  37.008  20.619  1.00  0.02
ATOM   2450  C   THR   278      15.400  37.759  16.838  1.00  0.01
ATOM   2451  O   THR   278      15.166  36.785  16.116  1.00  0.01
ATOM   2452  N   VAL   279      16.077  38.814  16.421  1.00  0.01
ATOM   2454  CA  VAL   279      16.660  38.833  15.073  1.00  0.01
ATOM   2455  CB  VAL   279      16.535  40.239  14.495  1.00  0.01
ATOM   2456  CG1 VAL   279      17.046  40.284  13.058  1.00  0.10
ATOM   2457  CG2 VAL   279      15.095  40.733  14.563  1.00  0.16
ATOM   2458  C   VAL   279      18.132  38.434  15.123  1.00  0.02
ATOM   2459  O   VAL   279      18.971  39.186  15.632  1.00  0.01
ATOM   2460  N   HIS   280      18.435  37.256  14.612  1.00  0.01
ATOM   2462  CA  HIS   280      19.819  36.778  14.583  1.00  0.01
ATOM   2463  CB  HIS   280      19.832  35.261  14.515  1.00  0.01
ATOM   2464  CG  HIS   280      19.416  34.650  15.827  1.00  0.02
ATOM   2465  ND1 HIS   280      20.196  34.504  16.911  1.00  0.02
ATOM   2467  CE1 HIS   280      19.477  33.940  17.902  1.00  0.01
ATOM   2468  NE2 HIS   280      18.231  33.720  17.431  1.00  0.01
ATOM   2469  CD2 HIS   280      18.179  34.151  16.151  1.00  0.02
ATOM   2470  C   HIS   280      20.608  37.339  13.416  1.00  0.01
ATOM   2471  O   HIS   280      20.053  37.708  12.376  1.00  0.02
ATOM   2472  N   ALA   281      21.900  37.467  13.640  1.00  0.01
ATOM   2474  CA  ALA   281      22.805  37.917  12.586  1.00  0.02
ATOM   2475  CB  ALA   281      23.395  39.255  12.996  1.00  0.02
ATOM   2476  C   ALA   281      23.925  36.914  12.334  1.00  0.02
ATOM   2477  O   ALA   281      24.867  36.794  13.130  1.00  0.02
ATOM   2478  N   TYR   282      23.786  36.179  11.245  1.00  0.01
ATOM   2480  CA  TYR   282      24.827  35.234  10.815  1.00  0.02
ATOM   2481  CB  TYR   282      24.245  33.824  10.781  1.00  0.01
ATOM   2482  CG  TYR   282      25.230  32.732  10.363  1.00  0.01
ATOM   2483  CD1 TYR   282      26.077  32.158  11.304  1.00  0.02
ATOM   2484  CE1 TYR   282      26.970  31.164  10.922  1.00  0.02
ATOM   2485  CZ  TYR   282      27.015  30.749   9.598  1.00  0.01
ATOM   2486  OH  TYR   282      27.848  29.715   9.225  1.00  0.02
ATOM   2487  CE2 TYR   282      26.173  31.323   8.655  1.00  0.01
ATOM   2488  CD2 TYR   282      25.279  32.312   9.039  1.00  0.01
ATOM   2489  C   TYR   282      25.313  35.635   9.428  1.00  0.02
ATOM   2490  O   TYR   282      24.588  35.437   8.445  1.00  0.01
ATOM   2491  N   GLU   283      26.581  36.000   9.330  1.00  0.01
ATOM   2493  CA  GLU   283      27.109  36.622   8.105  1.00  0.02
ATOM   2494  CB  GLU   283      27.338  35.575   7.023  1.00  0.02
ATOM   2495  CG  GLU   283      28.397  34.572   7.466  1.00  0.01
ATOM   2496  CD  GLU   283      28.706  33.602   6.333  1.00  0.01
ATOM   2497  OE1 GLU   283      28.065  32.562   6.282  1.00  0.02
ATOM   2498  OE2 GLU   283      29.593  33.911   5.550  1.00  0.02
ATOM   2499  C   GLU   283      26.174  37.731   7.630  1.00  0.01
ATOM   2500  O   GLU   283      26.034  38.739   8.327  1.00  0.01
ATOM   2501  N   ASP   284      25.576  37.576   6.461  1.00  0.02
ATOM   2503  CA  ASP   284      24.665  38.609   5.941  1.00  0.01
ATOM   2504  CB  ASP   284      24.866  38.754   4.433  1.00  0.02
ATOM   2505  CG  ASP   284      26.286  39.197   4.087  1.00  0.03
ATOM   2506  OD1 ASP   284      27.139  38.320   4.009  1.00  0.01
ATOM   2507  OD2 ASP   284      26.451  40.350   3.709  1.00  0.19
ATOM   2508  C   ASP   284      23.191  38.288   6.213  1.00  0.02
ATOM   2509  O   ASP   284      22.306  39.076   5.857  1.00  0.02
ATOM   2510  N   LYS   285      22.928  37.154   6.841  1.00  0.02
ATOM   2512  CA  LYS   285      21.547  36.712   7.060  1.00  0.01
ATOM   2513  CB  LYS   285      21.536  35.190   7.046  1.00  0.01
ATOM   2514  CG  LYS   285      22.118  34.650   5.745  1.00  0.02
ATOM   2515  CD  LYS   285      22.145  33.125   5.742  1.00  0.01
ATOM   2516  CE  LYS   285      22.707  32.582   4.433  1.00  0.01
ATOM   2517  NZ  LYS   285      22.701  31.111   4.430  1.00  0.00
ATOM   2518  C   LYS   285      20.970  37.204   8.384  1.00  0.01
ATOM   2519  O   LYS   285      21.419  36.809   9.470  1.00  0.01
ATOM   2520  N   ARG   286      19.946  38.035   8.267  1.00  0.01
ATOM   2522  CA  ARG   286      19.190  38.508   9.437  1.00  0.01
ATOM   2523  CB  ARG   286      18.762  39.955   9.215  1.00  0.02
ATOM   2524  CG  ARG   286      19.965  40.868   9.007  1.00  0.01
ATOM   2525  CD  ARG   286      20.894  40.860  10.220  1.00  0.02
ATOM   2526  NE  ARG   286      22.105  41.652   9.950  1.00  0.01
ATOM   2527  CZ  ARG   286      23.257  41.109   9.552  1.00  0.01
ATOM   2528  NH1 ARG   286      23.364  39.785   9.432  1.00  0.02
ATOM   2529  NH2 ARG   286      24.316  41.886   9.313  1.00  0.01
ATOM   2530  C   ARG   286      17.955  37.634   9.653  1.00  0.01
ATOM   2531  O   ARG   286      16.872  37.891   9.112  1.00  0.02
ATOM   2532  N   ILE   287      18.120  36.633  10.497  1.00  0.02
ATOM   2534  CA  ILE   287      17.068  35.634  10.703  1.00  0.01
ATOM   2535  CB  ILE   287      17.737  34.270  10.835  1.00  0.02
ATOM   2536  CG2 ILE   287      16.699  33.166  11.028  1.00  0.02
ATOM   2537  CG1 ILE   287      18.583  33.990   9.598  1.00  0.01
ATOM   2538  CD1 ILE   287      19.249  32.623   9.667  1.00  0.02
ATOM   2539  C   ILE   287      16.219  35.937  11.934  1.00  0.01
ATOM   2540  O   ILE   287      16.616  35.668  13.075  1.00  0.02
ATOM   2541  N   THR   288      15.054  36.512  11.690  1.00  0.02
ATOM   2543  CA  THR   288      14.117  36.819  12.778  1.00  0.01
ATOM   2544  CB  THR   288      13.153  37.897  12.296  1.00  0.02
ATOM   2545  OG1 THR   288      13.926  39.030  11.923  1.00  0.02
ATOM   2546  CG2 THR   288      12.180  38.325  13.390  1.00  0.02
ATOM   2547  C   THR   288      13.341  35.571  13.195  1.00  0.01
ATOM   2548  O   THR   288      12.588  34.991  12.404  1.00  0.01
ATOM   2549  N   ILE   289      13.540  35.163  14.436  1.00  0.02
ATOM   2551  CA  ILE   289      12.868  33.969  14.958  1.00  0.02
ATOM   2552  CB  ILE   289      13.943  32.961  15.350  1.00  0.00
ATOM   2553  CG2 ILE   289      14.910  33.557  16.355  1.00  0.01
ATOM   2554  CG1 ILE   289      13.358  31.675  15.909  1.00  0.01
ATOM   2555  CD1 ILE   289      14.458  30.855  16.564  1.00  0.81
ATOM   2556  C   ILE   289      11.962  34.293  16.151  1.00  0.02
ATOM   2557  O   ILE   289      12.358  34.930  17.139  1.00  0.01
ATOM   2558  N   ASP   290      10.713  33.879  16.017  1.00  0.02
ATOM   2560  CA  ASP   290       9.747  34.048  17.107  1.00  0.02
ATOM   2561  CB  ASP   290       8.422  34.563  16.550  1.00  0.02
ATOM   2562  CG  ASP   290       8.592  35.904  15.830  1.00  0.02
ATOM   2563  OD1 ASP   290       9.541  36.615  16.130  1.00  0.09
ATOM   2564  OD2 ASP   290       7.791  36.164  14.944  1.00  0.17
ATOM   2565  C   ASP   290       9.537  32.710  17.812  1.00  0.01
ATOM   2566  O   ASP   290       8.715  31.887  17.388  1.00  0.01
ATOM   2567  N   GLY   291      10.233  32.540  18.921  1.00  0.02
ATOM   2569  CA  GLY   291      10.215  31.270  19.651  1.00  0.01
ATOM   2570  C   GLY   291      11.642  30.779  19.861  1.00  0.01
ATOM   2571  O   GLY   291      12.534  31.083  19.061  1.00  0.02
ATOM   2572  N   GLY   292      11.844  30.014  20.916  1.00  0.02
ATOM   2574  CA  GLY   292      13.180  29.510  21.238  1.00  0.02
ATOM   2575  C   GLY   292      14.020  30.536  21.996  1.00  0.01
ATOM   2576  O   GLY   292      14.310  31.626  21.486  1.00  0.02
ATOM   2577  N   LEU   293      14.447  30.149  23.187  1.00  0.01
ATOM   2579  CA  LEU   293      15.296  31.010  24.026  1.00  0.01
ATOM   2580  CB  LEU   293      15.396  30.413  25.427  1.00  0.01
ATOM   2581  CG  LEU   293      14.200  30.796  26.287  1.00  0.01
ATOM   2582  CD1 LEU   293      14.236  30.069  27.625  1.00  0.19
ATOM   2583  CD2 LEU   293      14.166  32.304  26.507  1.00  0.15
ATOM   2584  C   LEU   293      16.701  31.153  23.452  1.00  0.02
ATOM   2585  O   LEU   293      17.397  30.157  23.222  1.00  0.01
ATOM   2586  N   PRO   294      17.121  32.396  23.274  1.00  0.02
ATOM   2587  CA  PRO   294      18.451  32.681  22.733  1.00  0.02
ATOM   2588  CB  PRO   294      18.459  34.157  22.476  1.00  0.01
ATOM   2589  CG  PRO   294      17.182  34.771  23.033  1.00  0.02
ATOM   2590  CD  PRO   294      16.357  33.612  23.567  1.00  0.02
ATOM   2591  C   PRO   294      19.558  32.287  23.708  1.00  0.01
ATOM   2592  O   PRO   294      19.529  32.637  24.897  1.00  0.02
ATOM   2593  N   SER   295      20.554  31.600  23.173  1.00  0.01
ATOM   2595  CA  SER   295      21.732  31.183  23.960  1.00  0.02
ATOM   2596  CB  SER   295      22.421  30.023  23.242  1.00  0.02
ATOM   2597  OG  SER   295      22.793  30.455  21.939  1.00  0.01
ATOM   2598  C   SER   295      22.732  32.325  24.171  1.00  0.02
ATOM   2599  O   SER   295      23.802  32.373  23.552  1.00  0.02
ATOM   2600  N   GLY   296      22.406  33.189  25.115  1.00  0.02
ATOM   2602  CA  GLY   296      23.231  34.358  25.390  1.00  0.02
ATOM   2603  C   GLY   296      22.390  35.447  26.037  1.00  0.02
ATOM   2604  O   GLY   296      22.855  36.581  26.204  1.00  0.02
ATOM   2605  N   CYS   297      21.132  35.129  26.303  1.00  0.02
ATOM   2607  CA  CYS   297      20.293  36.069  27.047  1.00  0.03
ATOM   2608  CB  CYS   297      18.817  35.841  26.735  1.00  0.02
ATOM   2609  SG  CYS   297      18.091  34.271  27.250  1.00  0.02
ATOM   2610  C   CYS   297      20.568  35.925  28.539  1.00  0.02
ATOM   2611  O   CYS   297      21.028  34.871  29.001  1.00  0.02
ATOM   2612  N   SER   298      20.371  37.020  29.255  1.00  0.02
ATOM   2614  CA  SER   298      20.622  37.057  30.699  1.00  0.01
ATOM   2615  CB  SER   298      20.274  38.451  31.205  1.00  0.02
ATOM   2616  OG  SER   298      20.423  38.468  32.618  1.00  0.02
ATOM   2617  C   SER   298      19.791  36.011  31.436  1.00  0.02
ATOM   2618  O   SER   298      18.562  35.972  31.318  1.00  0.03
ATOM   2619  N   ALA   299      20.507  35.164  32.161  1.00  0.02
ATOM   2621  CA  ALA   299      19.933  34.046  32.924  1.00  0.02
ATOM   2622  CB  ALA   299      19.059  34.591  34.049  1.00  0.02
ATOM   2623  C   ALA   299      19.122  33.080  32.065  1.00  0.01
ATOM   2624  O   ALA   299      18.060  32.611  32.498  1.00  0.01
ATOM   2625  N   THR   300      19.728  32.599  30.989  1.00  0.01
ATOM   2627  CA  THR   300      19.019  31.673  30.099  1.00  0.01
ATOM   2628  CB  THR   300      19.745  31.606  28.755  1.00  0.02
ATOM   2629  OG1 THR   300      19.107  30.615  27.959  1.00  0.01
ATOM   2630  CG2 THR   300      21.220  31.238  28.885  1.00  0.01
ATOM   2631  C   THR   300      18.859  30.269  30.688  1.00  0.02
ATOM   2632  O   THR   300      17.834  29.631  30.419  1.00  0.01
ATOM   2633  N   SER   301      19.661  29.916  31.682  1.00  0.01
ATOM   2635  CA  SER   301      19.512  28.604  32.317  1.00  0.02
ATOM   2636  CB  SER   301      20.834  28.219  32.969  1.00  0.01
ATOM   2637  OG  SER   301      21.816  28.155  31.944  1.00  0.02
ATOM   2638  C   SER   301      18.408  28.625  33.370  1.00  0.02
ATOM   2639  O   SER   301      17.682  27.633  33.511  1.00  0.01
ATOM   2640  N   ILE   302      18.103  29.817  33.857  1.00  0.02
ATOM   2642  CA  ILE   302      17.023  29.985  34.826  1.00  0.02
ATOM   2643  CB  ILE   302      17.280  31.266  35.610  1.00  0.02
ATOM   2644  CG2 ILE   302      16.063  31.663  36.435  1.00  0.02
ATOM   2645  CG1 ILE   302      18.514  31.125  36.491  1.00  0.01
ATOM   2646  CD1 ILE   302      18.731  32.369  37.343  1.00  0.02
ATOM   2647  C   ILE   302      15.693  30.088  34.099  1.00  0.01
ATOM   2648  O   ILE   302      14.715  29.459  34.519  1.00  0.02
ATOM   2649  N   LEU   303      15.751  30.603  32.882  1.00  0.02
ATOM   2651  CA  LEU   303      14.549  30.711  32.052  1.00  0.01
ATOM   2652  CB  LEU   303      14.826  31.675  30.898  1.00  0.02
ATOM   2653  CG  LEU   303      14.304  33.098  31.132  1.00  0.20
ATOM   2654  CD1 LEU   303      14.866  33.764  32.385  1.00  0.02
ATOM   2655  CD2 LEU   303      14.577  33.976  29.915  1.00  0.48
ATOM   2656  C   LEU   303      14.140  29.340  31.514  1.00  0.02
ATOM   2657  O   LEU   303      12.965  28.968  31.638  1.00  0.02
ATOM   2658  N   ASN   304      15.129  28.510  31.220  1.00  0.02
ATOM   2660  CA  ASN   304      14.854  27.131  30.797  1.00  0.02
ATOM   2661  CB  ASN   304      16.136  26.483  30.267  1.00  0.02
ATOM   2662  CG  ASN   304      16.379  26.699  28.768  1.00  0.02
ATOM   2663  OD1 ASN   304      16.080  25.826  27.944  1.00  0.01
ATOM   2664  ND2 ASN   304      17.036  27.794  28.434  1.00  0.02
ATOM   2667  C   ASN   304      14.330  26.299  31.969  1.00  0.02
ATOM   2668  O   ASN   304      13.250  25.711  31.846  1.00  0.02
ATOM   2669  N   THR   305      14.883  26.526  33.151  1.00  0.02
ATOM   2671  CA  THR   305      14.476  25.760  34.337  1.00  0.01
ATOM   2672  CB  THR   305      15.519  25.996  35.426  1.00  0.02
ATOM   2673  OG1 THR   305      16.724  25.365  35.015  1.00  0.02
ATOM   2674  CG2 THR   305      15.107  25.383  36.759  1.00  0.02
ATOM   2675  C   THR   305      13.089  26.139  34.864  1.00  0.02
ATOM   2676  O   THR   305      12.318  25.239  35.230  1.00  0.02
ATOM   2677  N   VAL   306      12.681  27.388  34.718  1.00  0.01
ATOM   2679  CA  VAL   306      11.340  27.743  35.188  1.00  0.01
ATOM   2680  CB  VAL   306      11.264  29.231  35.541  1.00  0.02
ATOM   2681  CG1 VAL   306      12.149  29.549  36.743  1.00  0.02
ATOM   2682  CG2 VAL   306      11.605  30.147  34.372  1.00  0.01
ATOM   2683  C   VAL   306      10.275  27.337  34.170  1.00  0.02
ATOM   2684  O   VAL   306       9.233  26.816  34.591  1.00  0.02
ATOM   2685  N   LEU   307      10.666  27.226  32.908  1.00  0.02
ATOM   2687  CA  LEU   307       9.747  26.708  31.896  1.00  0.01
ATOM   2688  CB  LEU   307      10.260  27.097  30.514  1.00  0.01
ATOM   2689  CG  LEU   307       9.967  28.564  30.226  1.00  0.01
ATOM   2690  CD1 LEU   307      10.767  29.075  29.035  1.00  0.02
ATOM   2691  CD2 LEU   307       8.473  28.776  30.008  1.00  0.01
ATOM   2692  C   LEU   307       9.626  25.195  32.018  1.00  0.02
ATOM   2693  O   LEU   307       8.499  24.689  31.996  1.00  0.02
ATOM   2694  N   ASN   308      10.694  24.559  32.475  1.00  0.02
ATOM   2696  CA  ASN   308      10.714  23.112  32.729  1.00  0.02
ATOM   2697  CB  ASN   308      12.154  22.765  33.130  1.00  0.01
ATOM   2698  CG  ASN   308      12.526  21.280  33.037  1.00  0.01
ATOM   2699  OD1 ASN   308      13.707  20.934  33.165  1.00  0.02
ATOM   2700  ND2 ASN   308      11.542  20.416  32.859  1.00  0.02
ATOM   2703  C   ASN   308       9.748  22.758  33.861  1.00  0.02
ATOM   2704  O   ASN   308       8.892  21.882  33.669  1.00  0.02
ATOM   2705  N   ASN   309       9.715  23.589  34.889  1.00  0.02
ATOM   2707  CA  ASN   309       8.838  23.349  36.039  1.00  0.01
ATOM   2708  CB  ASN   309       9.178  24.362  37.129  1.00  0.02
ATOM   2709  CG  ASN   309      10.250  23.846  38.088  1.00  0.02
ATOM   2710  OD1 ASN   309       9.920  23.347  39.171  1.00  0.01
ATOM   2711  ND2 ASN   309      11.509  24.032  37.728  1.00  0.01
ATOM   2714  C   ASN   309       7.367  23.502  35.673  1.00  0.01
ATOM   2715  O   ASN   309       6.576  22.576  35.906  1.00  0.01
ATOM   2716  N   ILE   310       7.067  24.502  34.861  1.00  0.02
ATOM   2718  CA  ILE   310       5.672  24.746  34.493  1.00  0.02
ATOM   2719  CB  ILE   310       5.546  26.200  34.067  1.00  0.02
ATOM   2720  CG2 ILE   310       4.078  26.564  33.900  1.00  0.02
ATOM   2721  CG1 ILE   310       6.179  27.110  35.111  1.00  0.02
ATOM   2722  CD1 ILE   310       6.247  28.552  34.625  1.00  0.01
ATOM   2723  C   ILE   310       5.184  23.812  33.380  1.00  0.01
ATOM   2724  O   ILE   310       4.000  23.453  33.377  1.00  0.02
ATOM   2725  N   TYR   311       6.105  23.226  32.630  1.00  0.02
ATOM   2727  CA  TYR   311       5.728  22.210  31.638  1.00  0.02
ATOM   2728  CB  TYR   311       6.907  21.911  30.711  1.00  0.01
ATOM   2729  CG  TYR   311       7.260  23.004  29.709  1.00  0.01
ATOM   2730  CD1 TYR   311       6.258  23.761  29.120  1.00  0.01
ATOM   2731  CE1 TYR   311       6.581  24.759  28.213  1.00  0.01
ATOM   2732  CZ  TYR   311       7.909  24.992  27.890  1.00  0.02
ATOM   2733  OH  TYR   311       8.228  25.969  26.973  1.00  0.01
ATOM   2734  CE2 TYR   311       8.913  24.223  28.462  1.00  0.01
ATOM   2735  CD2 TYR   311       8.587  23.221  29.365  1.00  0.00
ATOM   2736  C   TYR   311       5.333  20.908  32.320  1.00  0.01
ATOM   2737  O   TYR   311       4.314  20.308  31.954  1.00  0.02
ATOM   2738  N   VAL   312       5.976  20.617  33.439  1.00  0.02
ATOM   2740  CA  VAL   312       5.658  19.397  34.175  1.00  0.02
ATOM   2741  CB  VAL   312       6.809  19.101  35.124  1.00  0.02
ATOM   2742  CG1 VAL   312       6.540  17.852  35.952  1.00  0.02
ATOM   2743  CG2 VAL   312       8.101  18.945  34.338  1.00  0.02
ATOM   2744  C   VAL   312       4.368  19.564  34.960  1.00  0.02
ATOM   2745  O   VAL   312       3.523  18.660  34.934  1.00  0.02
ATOM   2746  N   MET   313       4.084  20.789  35.367  1.00  0.02
ATOM   2748  CA  MET   313       2.838  21.029  36.089  1.00  0.01
ATOM   2749  CB  MET   313       2.974  22.358  36.816  1.00  0.00
ATOM   2750  CG  MET   313       1.935  22.488  37.922  1.00  0.01
ATOM   2751  SD  MET   313       2.150  23.922  38.998  1.00  1.51
ATOM   2752  CE  MET   313       1.119  23.399  40.384  1.00  1.92
ATOM   2753  C   MET   313       1.646  21.047  35.134  1.00  0.02
ATOM   2754  O   MET   313       0.626  20.409  35.431  1.00  0.01
ATOM   2755  N   PHE   314       1.881  21.494  33.910  1.00  0.01
ATOM   2757  CA  PHE   314       0.828  21.479  32.890  1.00  0.01
ATOM   2758  CB  PHE   314       1.286  22.298  31.685  1.00  0.02
ATOM   2759  CG  PHE   314       0.329  22.269  30.491  1.00  0.01
ATOM   2760  CD1 PHE   314       0.526  21.361  29.457  1.00  0.01
ATOM   2761  CE1 PHE   314      -0.342  21.336  28.374  1.00  0.01
ATOM   2762  CZ  PHE   314      -1.409  22.222  28.320  1.00  0.01
ATOM   2763  CE2 PHE   314      -1.604  23.133  29.350  1.00  0.01
ATOM   2764  CD2 PHE   314      -0.736  23.158  30.434  1.00  0.01
ATOM   2765  C   PHE   314       0.525  20.060  32.432  1.00  0.01
ATOM   2766  O   PHE   314      -0.639  19.644  32.475  1.00  0.01
ATOM   2767  N   ALA   315       1.565  19.267  32.237  1.00  0.02
ATOM   2769  CA  ALA   315       1.373  17.907  31.736  1.00  0.02
ATOM   2770  CB  ALA   315       2.725  17.356  31.314  1.00  0.01
ATOM   2771  C   ALA   315       0.760  16.985  32.778  1.00  0.02
ATOM   2772  O   ALA   315      -0.170  16.231  32.459  1.00  0.01
ATOM   2773  N   LEU   316       1.088  17.218  34.036  1.00  0.02
ATOM   2775  CA  LEU   316       0.511  16.389  35.083  1.00  0.01
ATOM   2776  CB  LEU   316       1.394  16.444  36.319  1.00  0.00
ATOM   2777  CG  LEU   316       2.692  15.689  36.065  1.00  0.02
ATOM   2778  CD1 LEU   316       3.631  15.798  37.256  1.00  0.00
ATOM   2779  CD2 LEU   316       2.412  14.225  35.737  1.00  0.02
ATOM   2780  C   LEU   316      -0.920  16.792  35.403  1.00  0.02
ATOM   2781  O   LEU   316      -1.748  15.886  35.503  1.00  0.01
ATOM   2782  N   LYS   317      -1.270  18.065  35.273  1.00  0.02
ATOM   2784  CA  LYS   317      -2.668  18.465  35.503  1.00  0.02
ATOM   2785  CB  LYS   317      -2.740  19.960  35.784  1.00  0.02
ATOM   2786  CG  LYS   317      -2.219  20.336  37.166  1.00  0.01
ATOM   2787  CD  LYS   317      -2.441  21.826  37.398  1.00  0.02
ATOM   2788  CE  LYS   317      -2.003  22.273  38.785  1.00  0.87
ATOM   2789  NZ  LYS   317      -2.219  23.722  38.948  1.00  1.30
ATOM   2790  C   LYS   317      -3.574  18.175  34.309  1.00  0.01
ATOM   2791  O   LYS   317      -4.788  18.013  34.482  1.00  0.02
ATOM   2792  N   ARG   318      -2.976  17.979  33.145  1.00  0.02
ATOM   2794  CA  ARG   318      -3.745  17.659  31.942  1.00  0.01
ATOM   2795  CB  ARG   318      -2.928  18.130  30.743  1.00  0.01
ATOM   2796  CG  ARG   318      -3.716  18.095  29.439  1.00  0.01
ATOM   2797  CD  ARG   318      -2.848  18.523  28.264  1.00  0.01
ATOM   2798  NE  ARG   318      -3.630  18.615  27.022  1.00  0.01
ATOM   2799  CZ  ARG   318      -3.592  17.703  26.047  1.00  0.01
ATOM   2800  NH1 ARG   318      -2.834  16.612  26.177  1.00  0.01
ATOM   2801  NH2 ARG   318      -4.326  17.875  24.945  1.00  0.01
ATOM   2802  C   ARG   318      -4.013  16.157  31.830  1.00  0.02
ATOM   2803  O   ARG   318      -4.903  15.735  31.082  1.00  0.02
ATOM   2804  N   THR   319      -3.307  15.366  32.623  1.00  0.01
ATOM   2806  CA  THR   319      -3.535  13.918  32.606  1.00  0.01
ATOM   2807  CB  THR   319      -2.217  13.206  32.320  1.00  0.02
ATOM   2808  OG1 THR   319      -1.259  13.646  33.280  1.00  0.26
ATOM   2809  CG2 THR   319      -1.696  13.553  30.936  1.00  0.22
ATOM   2810  C   THR   319      -4.126  13.421  33.923  1.00  0.01
ATOM   2811  O   THR   319      -4.767  12.367  33.961  1.00  0.01
ATOM   2812  N   TYR   320      -3.888  14.168  34.986  1.00  0.01
ATOM   2814  CA  TYR   320      -4.415  13.843  36.310  1.00  0.01
ATOM   2815  CB  TYR   320      -3.305  13.238  37.165  1.00  0.01
ATOM   2816  CG  TYR   320      -2.644  11.968  36.641  1.00  0.01
ATOM   2817  CD1 TYR   320      -1.349  12.013  36.139  1.00  0.01
ATOM   2818  CE1 TYR   320      -0.742  10.852  35.683  1.00  0.01
ATOM   2819  CZ  TYR   320      -1.429   9.647  35.745  1.00  0.02
ATOM   2820  OH  TYR   320      -0.788   8.476  35.404  1.00  0.01
ATOM   2821  CE2 TYR   320      -2.720   9.599  36.252  1.00  0.01
ATOM   2822  CD2 TYR   320      -3.326  10.761  36.705  1.00  0.01
ATOM   2823  C   TYR   320      -4.903  15.102  37.007  1.00  0.02
ATOM   2824  O   TYR   320      -4.114  16.016  37.305  1.00  0.02
ATOM   2825  N   PRO   321      -6.182  15.096  37.335  1.00  0.02
ATOM   2826  CA  PRO   321      -6.771  16.212  38.078  1.00  0.02
ATOM   2827  CB  PRO   321      -8.223  15.868  38.212  1.00  0.01
ATOM   2828  CG  PRO   321      -8.474  14.498  37.598  1.00  0.01
ATOM   2829  CD  PRO   321      -7.131  14.018  37.074  1.00  0.02
ATOM   2830  C   PRO   321      -6.107  16.371  39.441  1.00  0.01
ATOM   2831  O   PRO   321      -5.762  15.385  40.105  1.00  0.02
ATOM   2832  N   ASN   322      -5.785  17.619  39.740  1.00  0.01
ATOM   2834  CA  ASN   322      -5.225  18.030  41.039  1.00  0.01
ATOM   2835  CB  ASN   322      -6.167  17.611  42.158  1.00  0.09
ATOM   2836  CG  ASN   322      -7.396  18.500  42.158  1.00  0.26
ATOM   2837  OD1 ASN   322      -8.475  18.100  41.707  1.00  1.04
ATOM   2838  ND2 ASN   322      -7.197  19.724  42.619  1.00  0.47
ATOM   2841  C   ASN   322      -3.829  17.500  41.361  1.00  0.02
ATOM   2842  O   ASN   322      -3.539  17.207  42.530  1.00  0.02
ATOM   2843  N   THR   323      -2.956  17.436  40.371  1.00  0.02
ATOM   2845  CA  THR   323      -1.548  17.145  40.680  1.00  0.01
ATOM   2846  CB  THR   323      -0.852  16.485  39.499  1.00  0.02
ATOM   2847  OG1 THR   323      -1.139  17.234  38.326  1.00  0.15
ATOM   2848  CG2 THR   323      -1.363  15.068  39.291  1.00  0.01
ATOM   2849  C   THR   323      -0.819  18.422  41.090  1.00  0.02
ATOM   2850  O   THR   323      -0.319  19.191  40.261  1.00  0.02
ATOM   2851  N   GLU   324      -0.802  18.637  42.393  1.00  0.02
ATOM   2853  CA  GLU   324      -0.185  19.826  42.988  1.00  0.01
ATOM   2854  CB  GLU   324      -0.796  20.019  44.374  1.00  0.02
ATOM   2855  CG  GLU   324      -2.311  19.813  44.387  1.00  0.01
ATOM   2856  CD  GLU   324      -3.048  20.860  43.551  1.00  0.02
ATOM   2857  OE1 GLU   324      -2.565  21.982  43.497  1.00  0.02
ATOM   2858  OE2 GLU   324      -4.112  20.536  43.034  1.00  0.02
ATOM   2859  C   GLU   324       1.326  19.629  43.120  1.00  0.01
ATOM   2860  O   GLU   324       1.835  18.516  42.937  1.00  0.02
ATOM   2861  N   MET   325       2.011  20.659  43.596  1.00  0.02
ATOM   2863  CA  MET   325       3.473  20.575  43.785  1.00  0.02
ATOM   2864  CB  MET   325       4.008  21.979  44.056  1.00  0.02
ATOM   2865  CG  MET   325       3.839  22.894  42.850  1.00  0.02
ATOM   2866  SD  MET   325       4.814  22.451  41.392  1.00  1.05
ATOM   2867  CE  MET   325       6.470  22.630  42.097  1.00  1.76
ATOM   2868  C   MET   325       3.877  19.658  44.946  1.00  0.02
ATOM   2869  O   MET   325       4.946  19.041  44.901  1.00  0.02
ATOM   2870  N   SER   326       2.919  19.350  45.806  1.00  0.02
ATOM   2872  CA  SER   326       3.136  18.419  46.920  1.00  0.02
ATOM   2873  CB  SER   326       2.019  18.640  47.932  1.00  0.02
ATOM   2874  OG  SER   326       0.811  18.189  47.327  1.00  0.54
ATOM   2875  C   SER   326       3.080  16.948  46.494  1.00  0.02
ATOM   2876  O   SER   326       3.250  16.057  47.332  1.00  0.01
ATOM   2877  N   ASP   327       2.807  16.690  45.226  1.00  0.01
ATOM   2879  CA  ASP   327       2.679  15.317  44.750  1.00  0.01
ATOM   2880  CB  ASP   327       1.458  15.260  43.837  1.00  0.02
ATOM   2881  CG  ASP   327       0.182  15.573  44.618  1.00  0.24
ATOM   2882  OD1 ASP   327      -0.188  16.741  44.682  1.00  0.53
ATOM   2883  OD2 ASP   327      -0.428  14.635  45.106  1.00  0.89
ATOM   2884  C   ASP   327       3.927  14.854  43.997  1.00  0.02
ATOM   2885  O   ASP   327       4.072  13.656  43.714  1.00  0.02
ATOM   2886  N   TYR   328       4.837  15.782  43.734  1.00  0.02
ATOM   2888  CA  TYR   328       6.047  15.458  42.963  1.00  0.02
ATOM   2889  CB  TYR   328       5.695  15.344  41.473  1.00  0.02
ATOM   2890  CG  TYR   328       5.109  16.592  40.804  1.00  0.01
ATOM   2891  CD1 TYR   328       3.735  16.807  40.807  1.00  0.02
ATOM   2892  CE1 TYR   328       3.208  17.943  40.208  1.00  0.02
ATOM   2893  CZ  TYR   328       4.054  18.855  39.596  1.00  0.02
ATOM   2894  OH  TYR   328       3.541  20.019  39.082  1.00  0.01
ATOM   2895  CE2 TYR   328       5.423  18.630  39.561  1.00  0.02
ATOM   2896  CD2 TYR   328       5.948  17.493  40.158  1.00  0.02
ATOM   2897  C   TYR   328       7.153  16.496  43.175  1.00  0.02
ATOM   2898  O   TYR   328       6.963  17.699  42.958  1.00  0.01
ATOM   2899  N   SER   329       8.313  16.014  43.580  1.00  0.02
ATOM   2901  CA  SER   329       9.475  16.900  43.733  1.00  0.01
ATOM   2902  CB  SER   329      10.254  16.502  44.977  1.00  0.02
ATOM   2903  OG  SER   329      10.739  15.182  44.778  1.00  1.13
ATOM   2904  C   SER   329      10.375  16.782  42.511  1.00  0.02
ATOM   2905  O   SER   329      10.522  15.693  41.947  1.00  0.01
ATOM   2906  N   LEU   330      10.961  17.884  42.084  1.00  0.02
ATOM   2908  CA  LEU   330      11.827  17.790  40.908  1.00  0.02
ATOM   2909  CB  LEU   330      11.001  18.040  39.642  1.00  0.01
ATOM   2910  CG  LEU   330      10.282  19.388  39.587  1.00  0.02
ATOM   2911  CD1 LEU   330      11.179  20.458  38.983  1.00  0.71
ATOM   2912  CD2 LEU   330       9.031  19.273  38.723  1.00  0.23
ATOM   2913  C   LEU   330      13.050  18.693  40.988  1.00  0.02
ATOM   2914  O   LEU   330      13.109  19.663  41.753  1.00  0.01
ATOM   2915  N   ILE   331      14.069  18.280  40.261  1.00  0.02
ATOM   2917  CA  ILE   331      15.272  19.097  40.139  1.00  0.01
ATOM   2918  CB  ILE   331      16.412  18.407  40.897  1.00  0.01
ATOM   2919  CG2 ILE   331      16.858  17.098  40.258  1.00  0.01
ATOM   2920  CG1 ILE   331      17.597  19.338  41.090  1.00  0.02
ATOM   2921  CD1 ILE   331      17.222  20.477  42.027  1.00  0.02
ATOM   2922  C   ILE   331      15.570  19.359  38.655  1.00  0.02
ATOM   2923  O   ILE   331      15.869  18.443  37.873  1.00  0.02
ATOM   2924  N   ALA   332      15.283  20.584  38.246  1.00  0.01
ATOM   2926  CA  ALA   332      15.496  20.987  36.851  1.00  0.02
ATOM   2927  CB  ALA   332      14.257  21.725  36.359  1.00  0.02
ATOM   2928  C   ALA   332      16.722  21.877  36.662  1.00  0.02
ATOM   2929  O   ALA   332      17.000  22.793  37.451  1.00  0.02
ATOM   2930  N   TYR   333      17.466  21.568  35.617  1.00  0.01
ATOM   2932  CA  TYR   333      18.614  22.392  35.231  1.00  0.02
ATOM   2933  CB  TYR   333      19.905  21.750  35.727  1.00  0.02
ATOM   2934  CG  TYR   333      21.016  22.742  36.083  1.00  0.02
ATOM   2935  CD1 TYR   333      22.033  22.341  36.939  1.00  0.02
ATOM   2936  CE1 TYR   333      23.035  23.231  37.301  1.00  0.01
ATOM   2937  CZ  TYR   333      23.025  24.526  36.804  1.00  0.02
ATOM   2938  OH  TYR   333      23.792  25.487  37.439  1.00  0.02
ATOM   2939  CE2 TYR   333      22.035  24.919  35.911  1.00  0.02
ATOM   2940  CD2 TYR   333      21.032  24.026  35.549  1.00  0.02
ATOM   2941  C   TYR   333      18.647  22.517  33.713  1.00  0.02
ATOM   2942  O   TYR   333      19.178  21.649  33.003  1.00  0.02
ATOM   2943  N   GLY   334      18.040  23.585  33.227  1.00  0.02
ATOM   2945  CA  GLY   334      17.992  23.828  31.785  1.00  0.01
ATOM   2946  C   GLY   334      17.017  22.865  31.118  1.00  0.01
ATOM   2947  O   GLY   334      15.802  22.979  31.291  1.00  0.02
ATOM   2948  N   ASP   335      17.569  21.899  30.401  1.00  0.02
ATOM   2950  CA  ASP   335      16.760  20.881  29.719  1.00  0.01
ATOM   2951  CB  ASP   335      17.308  20.671  28.306  1.00  0.01
ATOM   2952  CG  ASP   335      18.707  20.052  28.322  1.00  0.02
ATOM   2953  OD1 ASP   335      19.663  20.811  28.398  1.00  0.01
ATOM   2954  OD2 ASP   335      18.793  18.832  28.288  1.00  0.01
ATOM   2955  C   ASP   335      16.764  19.541  30.458  1.00  0.01
ATOM   2956  O   ASP   335      16.132  18.579  29.999  1.00  0.02
ATOM   2957  N   ASP   336      17.531  19.452  31.534  1.00  0.01
ATOM   2959  CA  ASP   336      17.664  18.177  32.250  1.00  0.01
ATOM   2960  CB  ASP   336      19.136  18.015  32.624  1.00  0.02
ATOM   2961  CG  ASP   336      19.432  16.629  33.193  1.00  0.01
ATOM   2962  OD1 ASP   336      18.665  15.718  32.928  1.00  0.02
ATOM   2963  OD2 ASP   336      20.430  16.509  33.894  1.00  0.01
ATOM   2964  C   ASP   336      16.779  18.155  33.495  1.00  0.02
ATOM   2965  O   ASP   336      16.926  18.998  34.389  1.00  0.01
ATOM   2966  N   LEU   337      15.884  17.181  33.549  1.00  0.02
ATOM   2968  CA  LEU   337      14.955  17.078  34.680  1.00  0.01
ATOM   2969  CB  LEU   337      13.552  17.360  34.152  1.00  0.02
ATOM   2970  CG  LEU   337      12.495  17.263  35.248  1.00  0.16
ATOM   2971  CD1 LEU   337      12.624  18.414  36.235  1.00  0.02
ATOM   2972  CD2 LEU   337      11.095  17.230  34.657  1.00  0.37
ATOM   2973  C   LEU   337      14.961  15.699  35.349  1.00  0.02
ATOM   2974  O   LEU   337      14.803  14.659  34.696  1.00  0.02
ATOM   2975  N   VAL   338      15.173  15.706  36.655  1.00  0.02
ATOM   2977  CA  VAL   338      14.922  14.503  37.460  1.00  0.02
ATOM   2978  CB  VAL   338      16.141  14.195  38.323  1.00  0.01
ATOM   2979  CG1 VAL   338      15.854  13.095  39.339  1.00  0.01
ATOM   2980  CG2 VAL   338      17.335  13.817  37.455  1.00  0.02
ATOM   2981  C   VAL   338      13.664  14.711  38.311  1.00  0.02
ATOM   2982  O   VAL   338      13.617  15.585  39.188  1.00  0.02
ATOM   2983  N   LEU   339      12.640  13.934  37.997  1.00  0.02
ATOM   2985  CA  LEU   339      11.329  14.050  38.656  1.00  0.00
ATOM   2986  CB  LEU   339      10.268  14.102  37.557  1.00  0.01
ATOM   2987  CG  LEU   339       8.843  14.154  38.105  1.00  0.15
ATOM   2988  CD1 LEU   339       8.622  15.396  38.958  1.00  0.98
ATOM   2989  CD2 LEU   339       7.824  14.102  36.973  1.00  0.90
ATOM   2990  C   LEU   339      11.052  12.861  39.577  1.00  0.02
ATOM   2991  O   LEU   339      10.853  11.736  39.107  1.00  0.02
ATOM   2992  N   ALA   340      10.952  13.130  40.867  1.00  0.02
ATOM   2994  CA  ALA   340      10.694  12.068  41.841  1.00  0.01
ATOM   2995  CB  ALA   340      11.807  12.066  42.872  1.00  0.02
ATOM   2996  C   ALA   340       9.338  12.212  42.532  1.00  0.02
ATOM   2997  O   ALA   340       9.097  13.117  43.346  1.00  0.02
ATOM   2998  N   SER   341       8.474  11.263  42.222  1.00  0.02
ATOM   3000  CA  SER   341       7.134  11.222  42.809  1.00  0.02
ATOM   3001  CB  SER   341       6.124  11.321  41.671  1.00  0.01
ATOM   3002  OG  SER   341       4.811  11.345  42.218  1.00  0.02
ATOM   3003  C   SER   341       6.902   9.934  43.601  1.00  0.02
ATOM   3004  O   SER   341       7.648   8.953  43.490  1.00  0.02
ATOM   3005  N   ASP   342       5.948  10.000  44.513  1.00  0.01
ATOM   3007  CA  ASP   342       5.480   8.788  45.184  1.00  0.02
ATOM   3008  CB  ASP   342       5.205   9.072  46.655  1.00  0.01
ATOM   3009  CG  ASP   342       6.538   9.111  47.383  1.00  0.02
ATOM   3010  OD1 ASP   342       7.433   8.426  46.905  1.00  0.02
ATOM   3011  OD2 ASP   342       6.695   9.964  48.244  1.00  0.01
ATOM   3012  C   ASP   342       4.238   8.214  44.513  1.00  0.01
ATOM   3013  O   ASP   342       3.791   7.130  44.896  1.00  0.01
ATOM   3014  N   PHE   343       3.722   8.877  43.492  1.00  0.01
ATOM   3016  CA  PHE   343       2.559   8.347  42.792  1.00  0.01
ATOM   3017  CB  PHE   343       1.543   9.470  42.606  1.00  0.01
ATOM   3018  CG  PHE   343       1.065  10.086  43.920  1.00  0.01
ATOM   3019  CD1 PHE   343       0.101   9.431  44.675  1.00  0.02
ATOM   3020  CE1 PHE   343      -0.332   9.979  45.875  1.00  0.02
ATOM   3021  CZ  PHE   343       0.200  11.182  46.322  1.00  0.02
ATOM   3022  CE2 PHE   343       1.162  11.839  45.565  1.00  0.01
ATOM   3023  CD2 PHE   343       1.592  11.293  44.363  1.00  0.01
ATOM   3024  C   PHE   343       3.014   7.805  41.449  1.00  0.01
ATOM   3025  O   PHE   343       4.004   8.290  40.886  1.00  0.02
ATOM   3026  N   ASP   344       2.335   6.773  40.976  1.00  0.02
ATOM   3028  CA  ASP   344       2.684   6.154  39.688  1.00  0.01
ATOM   3029  CB  ASP   344       2.108   4.740  39.635  1.00  0.02
ATOM   3030  CG  ASP   344       2.708   3.854  40.723  1.00  0.01
ATOM   3031  OD1 ASP   344       3.876   4.043  41.035  1.00  0.01
ATOM   3032  OD2 ASP   344       1.965   3.056  41.273  1.00  0.02
ATOM   3033  C   ASP   344       2.127   6.956  38.515  1.00  0.02
ATOM   3034  O   ASP   344       1.017   6.695  38.036  1.00  0.02
ATOM   3035  N   TYR   345       2.883   7.949  38.081  1.00  0.00
ATOM   3037  CA  TYR   345       2.461   8.742  36.928  1.00  0.01
ATOM   3038  CB  TYR   345       3.122  10.117  36.939  1.00  0.02
ATOM   3039  CG  TYR   345       2.799  11.010  38.133  1.00  0.02
ATOM   3040  CD1 TYR   345       3.774  11.879  38.606  1.00  0.01
ATOM   3041  CE1 TYR   345       3.506  12.695  39.696  1.00  0.54
ATOM   3042  CZ  TYR   345       2.260  12.646  40.304  1.00  0.33
ATOM   3043  OH  TYR   345       2.062  13.323  41.484  1.00  0.49
ATOM   3044  CE2 TYR   345       1.273  11.800  39.815  1.00  0.74
ATOM   3045  CD2 TYR   345       1.543  10.984  38.725  1.00  0.02
ATOM   3046  C   TYR   345       2.860   8.032  35.647  1.00  0.02
ATOM   3047  O   TYR   345       3.997   7.571  35.495  1.00  0.01
ATOM   3048  N   ASP   346       1.906   7.898  34.748  1.00  0.02
ATOM   3050  CA  ASP   346       2.220   7.343  33.440  1.00  0.02
ATOM   3051  CB  ASP   346       0.941   6.753  32.850  1.00  0.01
ATOM   3052  CG  ASP   346       1.232   5.882  31.629  1.00  0.01
ATOM   3053  OD1 ASP   346       2.049   6.294  30.815  1.00  0.01
ATOM   3054  OD2 ASP   346       0.573   4.864  31.489  1.00  0.02
ATOM   3055  C   ASP   346       2.769   8.471  32.573  1.00  0.01
ATOM   3056  O   ASP   346       2.010   9.183  31.907  1.00  0.01
ATOM   3057  N   ILE   347       4.086   8.532  32.466  1.00  0.01
ATOM   3059  CA  ILE   347       4.705   9.618  31.705  1.00  0.01
ATOM   3060  CB  ILE   347       6.127   9.839  32.205  1.00  0.01
ATOM   3061  CG2 ILE   347       6.795  11.018  31.511  1.00  0.14
ATOM   3062  CG1 ILE   347       6.114  10.098  33.704  1.00  0.64
ATOM   3063  CD1 ILE   347       7.457  10.655  34.159  1.00  0.01
ATOM   3064  C   ILE   347       4.641   9.400  30.187  1.00  0.01
ATOM   3065  O   ILE   347       4.593  10.395  29.458  1.00  0.01
ATOM   3066  N   ASN   348       4.264   8.203  29.757  1.00  0.01
ATOM   3068  CA  ASN   348       3.929   7.996  28.340  1.00  0.01
ATOM   3069  CB  ASN   348       3.836   6.503  28.044  1.00  0.01
ATOM   3070  CG  ASN   348       5.207   5.877  27.824  1.00  0.01
ATOM   3071  OD1 ASN   348       6.069   5.867  28.716  1.00  1.12
ATOM   3072  ND2 ASN   348       5.407   5.405  26.605  1.00  1.04
ATOM   3075  C   ASN   348       2.582   8.635  27.987  1.00  0.01
ATOM   3076  O   ASN   348       2.441   9.210  26.901  1.00  0.01
ATOM   3077  N   LEU   349       1.734   8.793  28.992  1.00  0.02
ATOM   3079  CA  LEU   349       0.431   9.443  28.819  1.00  0.01
ATOM   3080  CB  LEU   349      -0.496   8.914  29.912  1.00  0.01
ATOM   3081  CG  LEU   349      -1.900   9.502  29.834  1.00  0.48
ATOM   3082  CD1 LEU   349      -2.569   9.127  28.517  1.00  1.29
ATOM   3083  CD2 LEU   349      -2.747   9.038  31.015  1.00  1.12
ATOM   3084  C   LEU   349       0.556  10.966  28.937  1.00  0.01
ATOM   3085  O   LEU   349      -0.261  11.710  28.383  1.00  0.00
ATOM   3086  N   VAL   350       1.649  11.434  29.515  1.00  0.01
ATOM   3088  CA  VAL   350       1.861  12.879  29.576  1.00  0.00
ATOM   3089  CB  VAL   350       2.440  13.301  30.927  1.00  0.01
ATOM   3090  CG1 VAL   350       1.731  12.588  32.070  1.00  0.95
ATOM   3091  CG2 VAL   350       3.936  13.059  31.018  1.00  0.16
ATOM   3092  C   VAL   350       2.752  13.340  28.422  1.00  0.01
ATOM   3093  O   VAL   350       2.908  14.554  28.226  1.00  0.01
ATOM   3094  N   LYS   351       3.146  12.416  27.552  1.00  0.01
ATOM   3096  CA  LYS   351       3.965  12.787  26.394  1.00  0.01
ATOM   3097  CB  LYS   351       4.508  11.539  25.704  1.00  0.01
ATOM   3098  CG  LYS   351       5.541  10.831  26.568  1.00  0.01
ATOM   3099  CD  LYS   351       6.231   9.688  25.834  1.00  0.01
ATOM   3100  CE  LYS   351       7.304   9.058  26.715  1.00  0.01
ATOM   3101  NZ  LYS   351       8.028   7.990  26.005  1.00  0.01
ATOM   3102  C   LYS   351       3.193  13.606  25.368  1.00  0.00
ATOM   3103  O   LYS   351       3.770  14.556  24.829  1.00  0.01
ATOM   3104  N   LYS   352       1.879  13.450  25.298  1.00  0.00
ATOM   3106  CA  LYS   352       1.115  14.303  24.379  1.00  0.01
ATOM   3107  CB  LYS   352      -0.137  13.610  23.823  1.00  0.01
ATOM   3108  CG  LYS   352      -1.239  13.303  24.838  1.00  0.01
ATOM   3109  CD  LYS   352      -1.086  11.930  25.475  1.00  0.01
ATOM   3110  CE  LYS   352      -1.036  10.821  24.427  1.00  1.06
ATOM   3111  NZ  LYS   352      -0.817   9.515  25.061  1.00  1.16
ATOM   3112  C   LYS   352       0.753  15.645  25.017  1.00  0.01
ATOM   3113  O   LYS   352       0.581  16.624  24.285  1.00  0.01
ATOM   3114  N   SER   353       0.940  15.762  26.323  1.00  0.01
ATOM   3116  CA  SER   353       0.726  17.043  26.991  1.00  0.02
ATOM   3117  CB  SER   353       0.496  16.786  28.475  1.00  0.00
ATOM   3118  OG  SER   353      -0.561  15.846  28.611  1.00  0.89
ATOM   3119  C   SER   353       1.972  17.901  26.807  1.00  0.01
ATOM   3120  O   SER   353       1.871  19.074  26.424  1.00  0.02
ATOM   3121  N   PHE   354       3.112  17.227  26.778  1.00  0.01
ATOM   3123  CA  PHE   354       4.373  17.903  26.467  1.00  0.01
ATOM   3124  CB  PHE   354       5.546  17.047  26.926  1.00  0.01
ATOM   3125  CG  PHE   354       5.828  17.094  28.423  1.00  0.01
ATOM   3126  CD1 PHE   354       5.620  15.971  29.212  1.00  0.01
ATOM   3127  CE1 PHE   354       5.897  16.016  30.572  1.00  0.01
ATOM   3128  CZ  PHE   354       6.381  17.185  31.144  1.00  0.01
ATOM   3129  CE2 PHE   354       6.590  18.307  30.354  1.00  0.01
ATOM   3130  CD2 PHE   354       6.316  18.262  28.994  1.00  0.01
ATOM   3131  C   PHE   354       4.502  18.178  24.975  1.00  0.01
ATOM   3132  O   PHE   354       4.993  19.251  24.609  1.00  0.01
ATOM   3133  N   ALA   355       3.827  17.389  24.155  1.00  0.01
ATOM   3135  CA  ALA   355       3.796  17.652  22.713  1.00  0.01
ATOM   3136  CB  ALA   355       3.340  16.391  21.989  1.00  0.01
ATOM   3137  C   ALA   355       2.877  18.820  22.347  1.00  0.01
ATOM   3138  O   ALA   355       3.193  19.550  21.401  1.00  0.01
ATOM   3139  N   VAL   356       1.945  19.155  23.229  1.00  0.01
ATOM   3141  CA  VAL   356       1.133  20.370  23.057  1.00  0.01
ATOM   3142  CB  VAL   356      -0.128  20.234  23.911  1.00  0.01
ATOM   3143  CG1 VAL   356      -0.908  21.540  24.015  1.00  0.10
ATOM   3144  CG2 VAL   356      -1.027  19.124  23.380  1.00  0.05
ATOM   3145  C   VAL   356       1.929  21.613  23.468  1.00  0.01
ATOM   3146  O   VAL   356       1.729  22.701  22.917  1.00  0.01
ATOM   3147  N   LEU   357       2.958  21.388  24.269  1.00  0.01
ATOM   3149  CA  LEU   357       3.916  22.437  24.634  1.00  0.01
ATOM   3150  CB  LEU   357       4.482  22.092  26.007  1.00  0.01
ATOM   3151  CG  LEU   357       3.386  21.984  27.057  1.00  0.01
ATOM   3152  CD1 LEU   357       3.889  21.277  28.309  1.00  0.01
ATOM   3153  CD2 LEU   357       2.802  23.352  27.389  1.00  0.01
ATOM   3154  C   LEU   357       5.080  22.527  23.641  1.00  0.01
ATOM   3155  O   LEU   357       5.982  23.349  23.840  1.00  0.01
ATOM   3156  N   GLY   358       5.119  21.626  22.668  1.00  0.01
ATOM   3158  CA  GLY   358       6.158  21.628  21.626  1.00  0.01
ATOM   3159  C   GLY   358       7.353  20.737  21.964  1.00  0.01
ATOM   3160  O   GLY   358       8.307  20.630  21.184  1.00  0.01
ATOM   3161  N   HIS   359       7.255  20.034  23.076  1.00  0.01
ATOM   3163  CA  HIS   359       8.407  19.320  23.625  1.00  0.01
ATOM   3164  CB  HIS   359       8.614  19.800  25.057  1.00  0.01
ATOM   3165  CG  HIS   359       9.175  21.207  25.144  1.00  0.01
ATOM   3166  ND1 HIS   359       8.492  22.371  25.167  1.00  0.19
ATOM   3168  CE1 HIS   359       9.365  23.392  25.249  1.00  0.19
ATOM   3169  NE2 HIS   359      10.608  22.870  25.266  1.00  0.01
ATOM   3170  CD2 HIS   359      10.509  21.524  25.194  1.00  0.13
ATOM   3171  C   HIS   359       8.251  17.805  23.597  1.00  0.01
ATOM   3172  O   HIS   359       7.309  17.228  24.155  1.00  0.01
ATOM   3173  N   THR   360       9.215  17.161  22.964  1.00  0.01
ATOM   3175  CA  THR   360       9.238  15.695  22.942  1.00  0.01
ATOM   3176  CB  THR   360       9.751  15.232  21.584  1.00  0.01
ATOM   3177  OG1 THR   360       8.906  15.787  20.586  1.00  0.01
ATOM   3178  CG2 THR   360       9.729  13.713  21.442  1.00  0.01
ATOM   3179  C   THR   360      10.132  15.170  24.063  1.00  0.00
ATOM   3180  O   THR   360      11.320  15.509  24.142  1.00  0.01
ATOM   3181  N   ILE   361       9.531  14.421  24.971  1.00  0.01
ATOM   3183  CA  ILE   361      10.294  13.870  26.094  1.00  0.01
ATOM   3184  CB  ILE   361       9.461  13.971  27.365  1.00  0.01
ATOM   3185  CG2 ILE   361       9.094  15.424  27.629  1.00  0.01
ATOM   3186  CG1 ILE   361       8.199  13.126  27.278  1.00  0.01
ATOM   3187  CD1 ILE   361       7.445  13.127  28.600  1.00  0.01
ATOM   3188  C   ILE   361      10.713  12.421  25.854  1.00  0.01
ATOM   3189  O   ILE   361       9.973  11.606  25.289  1.00  0.01
ATOM   3190  N   THR   362      11.955  12.151  26.208  1.00  0.01
ATOM   3192  CA  THR   362      12.500  10.792  26.136  1.00  0.01
ATOM   3193  CB  THR   362      13.699  10.784  25.193  1.00  0.02
ATOM   3194  OG1 THR   362      14.706  11.616  25.755  1.00  0.01
ATOM   3195  CG2 THR   362      13.347  11.306  23.805  1.00  0.01
ATOM   3196  C   THR   362      12.965  10.334  27.514  1.00  0.01
ATOM   3197  O   THR   362      13.395  11.154  28.335  1.00  0.01
ATOM   3198  N   PRO   363      12.862   9.041  27.774  1.00  0.01
ATOM   3199  CA  PRO   363      13.562   8.460  28.921  1.00  0.02
ATOM   3200  CB  PRO   363      13.181   7.011  28.925  1.00  0.01
ATOM   3201  CG  PRO   363      12.357   6.708  27.682  1.00  0.01
ATOM   3202  CD  PRO   363      12.223   8.025  26.932  1.00  0.01
ATOM   3203  C   PRO   363      15.070   8.649  28.774  1.00  0.01
ATOM   3204  O   PRO   363      15.574   8.873  27.667  1.00  0.01
ATOM   3205  N   GLU   364      15.763   8.688  29.900  1.00  0.01
ATOM   3207  CA  GLU   364      17.228   8.795  29.857  1.00  0.01
ATOM   3208  CB  GLU   364      17.731   9.266  31.218  1.00  0.00
ATOM   3209  CG  GLU   364      19.238   9.518  31.225  1.00  0.26
ATOM   3210  CD  GLU   364      19.719   9.787  32.648  1.00  0.51
ATOM   3211  OE1 GLU   364      19.454  10.871  33.148  1.00  1.09
ATOM   3212  OE2 GLU   364      20.138   8.835  33.293  1.00  0.42
ATOM   3213  C   GLU   364      17.862   7.444  29.530  1.00  0.02
ATOM   3214  O   GLU   364      18.956   7.376  28.958  1.00  0.02
ATOM   3215  N   ASP   365      17.167   6.373  29.872  1.00  0.01
ATOM   3217  CA  ASP   365      17.647   5.051  29.481  1.00  0.01
ATOM   3218  CB  ASP   365      17.383   4.035  30.597  1.00  0.01
ATOM   3219  CG  ASP   365      15.908   3.650  30.690  1.00  0.01
ATOM   3220  OD1 ASP   365      15.156   4.393  31.306  1.00  0.00
ATOM   3221  OD2 ASP   365      15.537   2.747  29.949  1.00  0.02
ATOM   3222  C   ASP   365      16.971   4.635  28.177  1.00  0.01
ATOM   3223  O   ASP   365      15.755   4.777  28.008  1.00  0.01
ATOM   3224  N   LYS   366      17.761   4.072  27.281  1.00  0.01
ATOM   3226  CA  LYS   366      17.228   3.574  26.005  1.00  0.01
ATOM   3227  CB  LYS   366      18.245   3.853  24.906  1.00  0.01
ATOM   3228  CG  LYS   366      18.475   5.352  24.750  1.00  0.01
ATOM   3229  CD  LYS   366      19.442   5.645  23.610  1.00  0.01
ATOM   3230  CE  LYS   366      19.651   7.144  23.433  1.00  0.01
ATOM   3231  NZ  LYS   366      20.562   7.419  22.312  1.00  0.01
ATOM   3232  C   LYS   366      16.892   2.081  26.040  1.00  0.01
ATOM   3233  O   LYS   366      16.687   1.464  24.989  1.00  0.01
ATOM   3234  N   SER   367      16.847   1.508  27.233  1.00  0.01
ATOM   3236  CA  SER   367      16.588   0.071  27.369  1.00  0.01
ATOM   3237  CB  SER   367      17.400  -0.466  28.543  1.00  0.00
ATOM   3238  OG  SER   367      16.910   0.141  29.733  1.00  0.01
ATOM   3239  C   SER   367      15.109  -0.198  27.626  1.00  0.02
ATOM   3240  O   SER   367      14.661  -1.350  27.611  1.00  0.00
ATOM   3241  N   ASP   368      14.381   0.854  27.957  1.00  0.01
ATOM   3243  CA  ASP   368      12.940   0.740  28.168  1.00  0.01
ATOM   3244  CB  ASP   368      12.604   1.192  29.588  1.00  0.01
ATOM   3245  CG  ASP   368      13.216   0.251  30.629  1.00  0.02
ATOM   3246  OD1 ASP   368      12.520  -0.670  31.031  1.00  0.00
ATOM   3247  OD2 ASP   368      14.333   0.509  31.060  1.00  0.02
ATOM   3248  C   ASP   368      12.199   1.599  27.153  1.00  0.01
ATOM   3249  O   ASP   368      12.568   2.753  26.901  1.00  0.01
ATOM   3250  N   ASN   369      11.115   1.053  26.627  1.00  0.01
ATOM   3252  CA  ASN   369      10.285   1.766  25.637  1.00  0.01
ATOM   3253  CB  ASN   369       9.649   0.736  24.708  1.00  0.00
ATOM   3254  CG  ASN   369      10.727  -0.107  24.028  1.00  0.01
ATOM   3255  OD1 ASN   369      11.794   0.395  23.659  1.00  0.27
ATOM   3256  ND2 ASN   369      10.429  -1.385  23.868  1.00  0.32
ATOM   3259  C   ASN   369       9.190   2.597  26.313  1.00  0.00
ATOM   3260  O   ASN   369       7.999   2.472  26.003  1.00  0.01
ATOM   3261  N   GLY   370       9.625   3.505  27.170  1.00  0.00
ATOM   3263  CA  GLY   370       8.710   4.276  28.009  1.00  0.01
ATOM   3264  C   GLY   370       9.282   4.433  29.415  1.00  0.02
ATOM   3265  O   GLY   370      10.259   3.765  29.782  1.00  0.01
ATOM   3266  N   PHE   371       8.625   5.264  30.205  1.00  0.00
ATOM   3268  CA  PHE   371       9.111   5.583  31.557  1.00  0.01
ATOM   3269  CB  PHE   371       8.580   6.946  31.976  1.00  0.01
ATOM   3270  CG  PHE   371       9.291   8.130  31.326  1.00  0.00
ATOM   3271  CD1 PHE   371       8.874   8.616  30.093  1.00  0.01
ATOM   3272  CE1 PHE   371       9.521   9.702  29.521  1.00  0.01
ATOM   3273  CZ  PHE   371      10.585  10.301  30.180  1.00  0.01
ATOM   3274  CE2 PHE   371      11.008   9.809  31.408  1.00  0.01
ATOM   3275  CD2 PHE   371      10.361   8.724  31.981  1.00  0.02
ATOM   3276  C   PHE   371       8.699   4.541  32.592  1.00  0.01
ATOM   3277  O   PHE   371       7.598   4.586  33.154  1.00  0.00
ATOM   3278  N   THR   372       9.642   3.663  32.889  1.00  0.02
ATOM   3280  CA  THR   372       9.416   2.586  33.856  1.00  0.02
ATOM   3281  CB  THR   372      10.555   1.579  33.738  1.00  0.02
ATOM   3282  OG1 THR   372      10.541   0.772  34.909  1.00  0.17
ATOM   3283  CG2 THR   372      11.913   2.267  33.670  1.00  0.02
ATOM   3284  C   THR   372       9.302   3.090  35.291  1.00  0.01
ATOM   3285  O   THR   372      10.102   3.900  35.775  1.00  0.02
ATOM   3286  N   LEU   373       8.247   2.632  35.940  1.00  0.01
ATOM   3288  CA  LEU   373       8.023   2.935  37.354  1.00  0.01
ATOM   3289  CB  LEU   373       6.609   2.497  37.726  1.00  0.02
ATOM   3290  CG  LEU   373       5.545   3.178  36.869  1.00  0.01
ATOM   3291  CD1 LEU   373       4.177   2.547  37.096  1.00  0.02
ATOM   3292  CD2 LEU   373       5.491   4.680  37.121  1.00  0.02
ATOM   3293  C   LEU   373       9.029   2.177  38.214  1.00  0.02
ATOM   3294  O   LEU   373       9.563   1.144  37.791  1.00  0.00
ATOM   3295  N   GLY   374       9.357   2.748  39.360  1.00  0.02
ATOM   3297  CA  GLY   374      10.252   2.079  40.308  1.00  0.01
ATOM   3298  C   GLY   374      11.697   2.572  40.272  1.00  0.02
ATOM   3299  O   GLY   374      12.538   2.047  41.015  1.00  0.02
ATOM   3300  N   LYS   375      12.008   3.505  39.384  1.00  0.02
ATOM   3302  CA  LYS   375      13.386   4.006  39.308  1.00  0.01
ATOM   3303  CB  LYS   375      13.581   4.834  38.043  1.00  0.01
ATOM   3304  CG  LYS   375      13.500   3.964  36.795  1.00  0.02
ATOM   3305  CD  LYS   375      13.928   4.734  35.549  1.00  0.47
ATOM   3306  CE  LYS   375      13.018   5.926  35.282  1.00  1.13
ATOM   3307  NZ  LYS   375      13.390   6.606  34.030  1.00  1.81
ATOM   3308  C   LYS   375      13.756   4.823  40.541  1.00  0.02
ATOM   3309  O   LYS   375      12.909   5.487  41.153  1.00  0.01
ATOM   3310  N   ASN   376      14.998   4.664  40.962  1.00  0.02
ATOM   3312  CA  ASN   376      15.512   5.393  42.125  1.00  0.02
ATOM   3313  CB  ASN   376      16.090   4.393  43.123  1.00  0.01
ATOM   3314  CG  ASN   376      17.220   3.572  42.506  1.00  1.15
ATOM   3315  OD1 ASN   376      18.219   4.131  42.035  1.00  1.46
ATOM   3316  ND2 ASN   376      17.069   2.260  42.544  1.00  1.76
ATOM   3319  C   ASN   376      16.563   6.431  41.738  1.00  0.02
ATOM   3320  O   ASN   376      17.071   6.437  40.607  1.00  0.02
ATOM   3321  N   ILE   377      17.065   7.113  42.757  1.00  0.01
ATOM   3323  CA  ILE   377      17.986   8.241  42.559  1.00  0.01
ATOM   3324  CB  ILE   377      18.015   9.029  43.870  1.00  0.01
ATOM   3325  CG2 ILE   377      18.510   8.162  45.021  1.00  0.02
ATOM   3326  CG1 ILE   377      18.865  10.287  43.757  1.00  0.02
ATOM   3327  CD1 ILE   377      18.328  11.236  42.693  1.00  0.02
ATOM   3328  C   ILE   377      19.413   7.850  42.127  1.00  0.02
ATOM   3329  O   ILE   377      20.043   8.642  41.419  1.00  0.02
ATOM   3330  N   THR   378      19.790   6.586  42.250  1.00  0.02
ATOM   3332  CA  THR   378      21.127   6.177  41.812  1.00  0.01
ATOM   3333  CB  THR   378      21.611   5.006  42.658  1.00  0.01
ATOM   3334  OG1 THR   378      20.977   3.818  42.202  1.00  0.02
ATOM   3335  CG2 THR   378      21.306   5.200  44.139  1.00  0.02
ATOM   3336  C   THR   378      21.094   5.746  40.349  1.00  0.02
ATOM   3337  O   THR   378      22.145   5.567  39.723  1.00  0.01
ATOM   3338  N   ASP   379      19.893   5.642  39.797  1.00  0.01
ATOM   3340  CA  ASP   379      19.739   5.273  38.391  1.00  0.01
ATOM   3341  CB  ASP   379      18.393   4.585  38.188  1.00  0.02
ATOM   3342  CG  ASP   379      18.215   3.371  39.092  1.00  0.01
ATOM   3343  OD1 ASP   379      19.188   2.673  39.343  1.00  0.01
ATOM   3344  OD2 ASP   379      17.065   3.090  39.417  1.00  0.02
ATOM   3345  C   ASP   379      19.749   6.511  37.507  1.00  0.02
ATOM   3346  O   ASP   379      20.048   6.418  36.310  1.00  0.01
ATOM   3347  N   VAL   380      19.440   7.658  38.090  1.00  0.01
ATOM   3349  CA  VAL   380      19.443   8.885  37.294  1.00  0.02
ATOM   3350  CB  VAL   380      18.432   9.884  37.848  1.00  0.01
ATOM   3351  CG1 VAL   380      17.052   9.244  37.958  1.00  0.02
ATOM   3352  CG2 VAL   380      18.852  10.446  39.195  1.00  0.02
ATOM   3353  C   VAL   380      20.850   9.473  37.238  1.00  0.01
ATOM   3354  O   VAL   380      21.643   9.377  38.183  1.00  0.01
ATOM   3355  N   THR   381      21.165  10.012  36.076  1.00  0.02
ATOM   3357  CA  THR   381      22.492  10.572  35.829  1.00  0.01
ATOM   3358  CB  THR   381      23.044   9.851  34.603  1.00  0.01
ATOM   3359  OG1 THR   381      22.732   8.471  34.745  1.00  0.02
ATOM   3360  CG2 THR   381      24.553   9.991  34.452  1.00  0.02
ATOM   3361  C   THR   381      22.378  12.074  35.588  1.00  0.02
ATOM   3362  O   THR   381      22.697  12.574  34.499  1.00  0.02
ATOM   3363  N   PHE   382      22.007  12.785  36.641  1.00  0.01
ATOM   3365  CA  PHE   382      21.734  14.225  36.543  1.00  0.02
ATOM   3366  CB  PHE   382      21.143  14.697  37.868  1.00  0.01
ATOM   3367  CG  PHE   382      20.573  16.114  37.856  1.00  0.02
ATOM   3368  CD1 PHE   382      19.640  16.478  36.895  1.00  0.01
ATOM   3369  CE1 PHE   382      19.118  17.764  36.883  1.00  0.02
ATOM   3370  CZ  PHE   382      19.525  18.686  37.838  1.00  0.02
ATOM   3371  CE2 PHE   382      20.451  18.319  38.806  1.00  0.01
ATOM   3372  CD2 PHE   382      20.972  17.032  38.818  1.00  0.02
ATOM   3373  C   PHE   382      23.026  14.973  36.241  1.00  0.02
ATOM   3374  O   PHE   382      24.059  14.720  36.868  1.00  0.02
ATOM   3375  N   LEU   383      22.983  15.763  35.179  1.00  0.02
ATOM   3377  CA  LEU   383      24.151  16.496  34.652  1.00  0.02
ATOM   3378  CB  LEU   383      24.582  17.543  35.672  1.00  0.02
ATOM   3379  CG  LEU   383      23.469  18.532  35.997  1.00  0.02
ATOM   3380  CD1 LEU   383      23.867  19.410  37.176  1.00  0.02
ATOM   3381  CD2 LEU   383      23.100  19.376  34.781  1.00  0.02
ATOM   3382  C   LEU   383      25.340  15.577  34.362  1.00  0.02
ATOM   3383  O   LEU   383      26.479  15.921  34.699  1.00  0.01
ATOM   3384  N   LYS   384      25.049  14.402  33.812  1.00  0.01
ATOM   3386  CA  LYS   384      26.044  13.361  33.485  1.00  0.01
ATOM   3387  CB  LYS   384      27.033  13.921  32.470  1.00  0.01
ATOM   3388  CG  LYS   384      26.311  14.343  31.193  1.00  0.01
ATOM   3389  CD  LYS   384      27.260  14.995  30.196  1.00  0.01
ATOM   3390  CE  LYS   384      28.355  14.033  29.753  1.00  0.01
ATOM   3391  NZ  LYS   384      27.791  12.860  29.062  1.00  0.02
ATOM   3392  C   LYS   384      26.787  12.814  34.711  1.00  0.02
ATOM   3393  O   LYS   384      27.909  12.301  34.586  1.00  0.01
ATOM   3394  N   ARG   385      26.137  12.878  35.865  1.00  0.02
ATOM   3396  CA  ARG   385      26.690  12.362  37.118  1.00  0.02
ATOM   3397  CB  ARG   385      26.994  13.541  38.031  1.00  0.02
ATOM   3398  CG  ARG   385      27.971  14.525  37.409  1.00  0.02
ATOM   3399  CD  ARG   385      28.131  15.759  38.285  1.00  0.01
ATOM   3400  NE  ARG   385      29.156  16.658  37.742  1.00  0.02
ATOM   3401  CZ  ARG   385      28.896  17.911  37.368  1.00  0.03
ATOM   3402  NH1 ARG   385      27.662  18.403  37.496  1.00  0.01
ATOM   3403  NH2 ARG   385      29.874  18.678  36.880  1.00  0.02
ATOM   3404  C   ARG   385      25.681  11.467  37.830  1.00  0.02
ATOM   3405  O   ARG   385      24.635  11.928  38.309  1.00  0.02
ATOM   3406  N   ALA   386      26.032  10.202  37.954  1.00  0.02
ATOM   3408  CA  ALA   386      25.176   9.249  38.666  1.00  0.02
ATOM   3409  CB  ALA   386      25.633   7.833  38.338  1.00  0.02
ATOM   3410  C   ALA   386      25.263   9.491  40.168  1.00  0.02
ATOM   3411  O   ALA   386      26.309   9.919  40.678  1.00  0.01
ATOM   3412  N   PHE   387      24.152   9.285  40.854  1.00  0.02
ATOM   3414  CA  PHE   387      24.112   9.467  42.315  1.00  0.00
ATOM   3415  CB  PHE   387      22.690   9.802  42.755  1.00  0.02
ATOM   3416  CG  PHE   387      22.190  11.202  42.405  1.00  0.02
ATOM   3417  CD1 PHE   387      22.171  12.182  43.388  1.00  0.02
ATOM   3418  CE1 PHE   387      21.712  13.457  43.088  1.00  0.01
ATOM   3419  CZ  PHE   387      21.264  13.753  41.807  1.00  0.01
ATOM   3420  CE2 PHE   387      21.271  12.769  40.828  1.00  0.02
ATOM   3421  CD2 PHE   387      21.729  11.494  41.127  1.00  0.02
ATOM   3422  C   PHE   387      24.561   8.206  43.044  1.00  0.02
ATOM   3423  O   PHE   387      23.740   7.454  43.580  1.00  0.02
ATOM   3424  N   GLU   388      25.864   7.997  43.100  1.00  0.02
ATOM   3426  CA  GLU   388      26.371   6.776  43.731  1.00  0.02
ATOM   3427  CB  GLU   388      27.475   6.179  42.870  1.00  0.02
ATOM   3428  CG  GLU   388      26.935   5.773  41.504  1.00  0.01
ATOM   3429  CD  GLU   388      28.047   5.176  40.647  1.00  1.07
ATOM   3430  OE1 GLU   388      29.000   4.675  41.227  1.00  1.22
ATOM   3431  OE2 GLU   388      27.936   5.260  39.433  1.00  1.61
ATOM   3432  C   GLU   388      26.882   7.043  45.137  1.00  0.02
ATOM   3433  O   GLU   388      27.735   7.907  45.358  1.00  0.02
ATOM   3434  N   ARG   389      26.337   6.300  46.082  1.00  0.02
ATOM   3436  CA  ARG   389      26.757   6.439  47.476  1.00  0.01
ATOM   3437  CB  ARG   389      25.768   5.680  48.357  1.00  0.01
ATOM   3438  CG  ARG   389      26.275   5.582  49.791  1.00  0.03
ATOM   3439  CD  ARG   389      25.446   4.621  50.627  1.00  0.48
ATOM   3440  NE  ARG   389      26.139   4.314  51.888  1.00  0.30
ATOM   3441  CZ  ARG   389      25.529   4.286  53.073  1.00  1.01
ATOM   3442  NH1 ARG   389      24.236   4.603  53.165  1.00  1.83
ATOM   3443  NH2 ARG   389      26.223   3.983  54.172  1.00  0.81
ATOM   3444  C   ARG   389      28.160   5.883  47.712  1.00  0.01
ATOM   3445  O   ARG   389      28.442   4.712  47.433  1.00  0.03
ATOM   3446  N   ASP   390      29.049   6.752  48.163  1.00  0.02
ATOM   3448  CA  ASP   390      30.322   6.299  48.709  1.00  0.02
ATOM   3449  CB  ASP   390      31.267   7.489  48.845  1.00  0.01
ATOM   3450  CG  ASP   390      32.491   7.083  49.657  1.00  0.03
ATOM   3451  OD1 ASP   390      33.197   6.211  49.175  1.00  0.02
ATOM   3452  OD2 ASP   390      32.424   7.308  50.860  1.00  0.03
ATOM   3453  C   ASP   390      30.028   5.688  50.072  1.00  0.03
ATOM   3454  O   ASP   390      29.750   6.409  51.041  1.00  0.02
ATOM   3455  N   CYS   391      30.264   4.392  50.180  1.00  0.02
ATOM   3457  CA  CYS   391      29.840   3.628  51.361  1.00  0.01
ATOM   3458  CB  CYS   391      29.786   2.159  50.966  1.00  0.02
ATOM   3459  SG  CYS   391      28.648   1.766  49.618  1.00  0.11
ATOM   3460  C   CYS   391      30.726   3.786  52.597  1.00  0.02
ATOM   3461  O   CYS   391      30.330   3.339  53.677  1.00  0.01
ATOM   3462  N   VAL   392      31.839   4.492  52.481  1.00  0.02
ATOM   3464  CA  VAL   392      32.686   4.720  53.651  1.00  0.01
ATOM   3465  CB  VAL   392      34.117   4.919  53.158  1.00  0.66
ATOM   3466  CG1 VAL   392      35.098   5.075  54.315  1.00  0.72
ATOM   3467  CG2 VAL   392      34.548   3.770  52.254  1.00  0.97
ATOM   3468  C   VAL   392      32.224   5.954  54.432  1.00  0.02
ATOM   3469  O   VAL   392      32.428   6.037  55.648  1.00  0.02
ATOM   3470  N   LEU   393      31.537   6.860  53.753  1.00  0.03
ATOM   3472  CA  LEU   393      31.042   8.067  54.425  1.00  0.02
ATOM   3473  CB  LEU   393      31.568   9.278  53.669  1.00  0.01
ATOM   3474  CG  LEU   393      33.087   9.389  53.725  1.00  0.32
ATOM   3475  CD1 LEU   393      33.572  10.519  52.828  1.00  0.37
ATOM   3476  CD2 LEU   393      33.574   9.590  55.156  1.00  0.56
ATOM   3477  C   LEU   393      29.518   8.138  54.463  1.00  0.03
ATOM   3478  O   LEU   393      28.944   8.878  55.271  1.00  0.01
ATOM   3479  N   GLY   394      28.879   7.410  53.564  1.00  0.03
ATOM   3481  CA  GLY   394      27.420   7.434  53.455  1.00  0.02
ATOM   3482  C   GLY   394      26.971   8.636  52.631  1.00  0.02
ATOM   3483  O   GLY   394      25.895   9.200  52.870  1.00  0.03
ATOM   3484  N   PHE   395      27.809   9.026  51.682  1.00  0.02
ATOM   3486  CA  PHE   395      27.550  10.244  50.897  1.00  0.03
ATOM   3487  CB  PHE   395      28.653  11.274  51.149  1.00  0.02
ATOM   3488  CG  PHE   395      28.774  11.847  52.564  1.00  0.01
ATOM   3489  CD1 PHE   395      27.662  11.956  53.388  1.00  0.01
ATOM   3490  CE1 PHE   395      27.788  12.477  54.668  1.00  0.01
ATOM   3491  CZ  PHE   395      29.029  12.903  55.124  1.00  0.03
ATOM   3492  CE2 PHE   395      30.139  12.812  54.295  1.00  0.03
ATOM   3493  CD2 PHE   395      30.010  12.290  53.015  1.00  0.03
ATOM   3494  C   PHE   395      27.499   9.967  49.398  1.00  0.02
ATOM   3495  O   PHE   395      28.457   9.433  48.824  1.00  0.02
ATOM   3496  N   TYR   396      26.409  10.375  48.772  1.00  0.01
ATOM   3498  CA  TYR   396      26.265  10.275  47.316  1.00  0.02
ATOM   3499  CB  TYR   396      24.844  10.642  46.895  1.00  0.02
ATOM   3500  CG  TYR   396      23.703   9.738  47.358  1.00  0.02
ATOM   3501  CD1 TYR   396      23.283   8.688  46.552  1.00  0.02
ATOM   3502  CE1 TYR   396      22.226   7.881  46.954  1.00  0.02
ATOM   3503  CZ  TYR   396      21.588   8.131  48.162  1.00  0.01
ATOM   3504  OH  TYR   396      20.437   7.445  48.484  1.00  0.01
ATOM   3505  CE2 TYR   396      22.010   9.174  48.974  1.00  0.02
ATOM   3506  CD2 TYR   396      23.062   9.981  48.567  1.00  0.02
ATOM   3507  C   TYR   396      27.215  11.251  46.632  1.00  0.02
ATOM   3508  O   TYR   396      27.140  12.472  46.829  1.00  0.02
ATOM   3509  N   LYS   397      28.109  10.700  45.835  1.00  0.01
ATOM   3511  CA  LYS   397      29.064  11.511  45.085  1.00  0.02
ATOM   3512  CB  LYS   397      30.452  10.889  45.227  1.00  0.02
ATOM   3513  CG  LYS   397      30.462   9.415  44.852  1.00  0.02
ATOM   3514  CD  LYS   397      31.841   8.804  45.060  1.00  0.02
ATOM   3515  CE  LYS   397      31.842   7.316  44.732  1.00  0.01
ATOM   3516  NZ  LYS   397      33.180   6.738  44.934  1.00  0.02
ATOM   3517  C   LYS   397      28.646  11.609  43.622  1.00  0.01
ATOM   3518  O   LYS   397      27.940  10.733  43.104  1.00  0.01
ATOM   3519  N   PRO   398      28.942  12.755  43.028  1.00  0.02
ATOM   3520  CA  PRO   398      28.676  12.993  41.602  1.00  0.02
ATOM   3521  CB  PRO   398      28.893  14.461  41.416  1.00  0.02
ATOM   3522  CG  PRO   398      29.506  15.046  42.675  1.00  0.02
ATOM   3523  CD  PRO   398      29.555  13.913  43.682  1.00  0.02
ATOM   3524  C   PRO   398      29.606  12.205  40.684  1.00  0.02
ATOM   3525  O   PRO   398      30.589  12.754  40.167  1.00  0.01
ATOM   3526  N   VAL   399      29.230  10.972  40.393  1.00  0.01
ATOM   3528  CA  VAL   399      30.080  10.103  39.576  1.00  0.01
ATOM   3529  CB  VAL   399      29.736   8.657  39.904  1.00  0.01
ATOM   3530  CG1 VAL   399      30.636   7.690  39.141  1.00  0.02
ATOM   3531  CG2 VAL   399      29.847   8.416  41.401  1.00  0.02
ATOM   3532  C   VAL   399      29.864  10.349  38.091  1.00  0.01
ATOM   3533  O   VAL   399      28.854   9.922  37.517  1.00  0.03
ATOM   3534  N   MET   400      30.801  11.050  37.478  1.00  0.01
ATOM   3536  CA  MET   400      30.707  11.275  36.038  1.00  0.02
ATOM   3537  CB  MET   400      31.634  12.399  35.604  1.00  0.02
ATOM   3538  CG  MET   400      31.200  13.732  36.193  1.00  0.02
ATOM   3539  SD  MET   400      31.860  15.187  35.353  1.00  0.02
ATOM   3540  CE  MET   400      31.148  14.902  33.715  1.00  0.02
ATOM   3541  C   MET   400      31.037  10.009  35.264  1.00  0.02
ATOM   3542  O   MET   400      31.745   9.116  35.748  1.00  0.01
ATOM   3543  N   ASN   401      30.406   9.901  34.110  1.00  0.01
ATOM   3545  CA  ASN   401      30.657   8.774  33.209  1.00  0.02
ATOM   3546  CB  ASN   401      29.698   8.912  32.031  1.00  0.01
ATOM   3547  CG  ASN   401      29.973   7.845  30.982  1.00  0.19
ATOM   3548  OD1 ASN   401      30.785   8.061  30.075  1.00  0.50
ATOM   3549  ND2 ASN   401      29.384   6.678  31.173  1.00  0.39
ATOM   3552  C   ASN   401      32.116   8.784  32.747  1.00  0.02
ATOM   3553  O   ASN   401      32.592   9.771  32.174  1.00  0.02
ATOM   3554  N   SER   402      32.770   7.638  32.844  1.00  0.01
ATOM   3556  CA  SER   402      34.212   7.578  32.576  1.00  0.02
ATOM   3557  CB  SER   402      34.760   6.307  33.203  1.00  0.02
ATOM   3558  OG  SER   402      34.541   6.395  34.606  1.00  0.01
ATOM   3559  C   SER   402      34.592   7.629  31.094  1.00  0.02
ATOM   3560  O   SER   402      35.678   8.138  30.791  1.00  0.02
ATOM   3561  N   LYS   403      33.635   7.429  30.202  1.00  0.01
ATOM   3563  CA  LYS   403      33.922   7.530  28.769  1.00  0.02
ATOM   3564  CB  LYS   403      32.847   6.779  27.989  1.00  0.02
ATOM   3565  CG  LYS   403      32.853   5.288  28.304  1.00  0.02
ATOM   3566  CD  LYS   403      34.137   4.627  27.814  1.00  0.01
ATOM   3567  CE  LYS   403      34.185   3.150  28.184  1.00  0.02
ATOM   3568  NZ  LYS   403      35.442   2.535  27.727  1.00  0.02
ATOM   3569  C   LYS   403      33.933   8.993  28.341  1.00  0.02
ATOM   3570  O   LYS   403      34.845   9.409  27.614  1.00  0.02
ATOM   3571  N   VAL   404      33.121   9.806  29.000  1.00  0.01
ATOM   3573  CA  VAL   404      33.157  11.239  28.705  1.00  0.02
ATOM   3574  CB  VAL   404      31.785  11.881  28.920  1.00  0.01
ATOM   3575  CG1 VAL   404      31.342  11.867  30.379  1.00  0.07
ATOM   3576  CG2 VAL   404      31.766  13.308  28.387  1.00  0.01
ATOM   3577  C   VAL   404      34.251  11.931  29.522  1.00  0.02
ATOM   3578  O   VAL   404      34.816  12.922  29.047  1.00  0.02
ATOM   3579  N   LEU   405      34.745  11.266  30.558  1.00  0.02
ATOM   3581  CA  LEU   405      35.931  11.773  31.256  1.00  0.02
ATOM   3582  CB  LEU   405      36.067  11.089  32.611  1.00  0.01
ATOM   3583  CG  LEU   405      34.976  11.527  33.581  1.00  0.02
ATOM   3584  CD1 LEU   405      35.048  10.723  34.875  1.00  0.02
ATOM   3585  CD2 LEU   405      35.073  13.021  33.868  1.00  0.03
ATOM   3586  C   LEU   405      37.177  11.514  30.415  1.00  0.02
ATOM   3587  O   LEU   405      37.989  12.432  30.245  1.00  0.01
ATOM   3588  N   GLU   406      37.151  10.426  29.658  1.00  0.02
ATOM   3590  CA  GLU   406      38.214  10.146  28.687  1.00  0.02
ATOM   3591  CB  GLU   406      37.994   8.759  28.097  1.00  0.02
ATOM   3592  CG  GLU   406      38.220   7.668  29.133  1.00  0.02
ATOM   3593  CD  GLU   406      37.769   6.318  28.593  1.00  0.02
ATOM   3594  OE1 GLU   406      38.450   5.794  27.725  1.00  0.02
ATOM   3595  OE2 GLU   406      36.775   5.811  29.096  1.00  0.01
ATOM   3596  C   GLU   406      38.196  11.163  27.555  1.00  0.02
ATOM   3597  O   GLU   406      39.236  11.774  27.295  1.00  0.01
ATOM   3598  N   ALA   407      37.006  11.560  27.132  1.00  0.02
ATOM   3600  CA  ALA   407      36.873  12.558  26.065  1.00  0.02
ATOM   3601  CB  ALA   407      35.412  12.600  25.638  1.00  0.02
ATOM   3602  C   ALA   407      37.309  13.960  26.487  1.00  0.02
ATOM   3603  O   ALA   407      38.058  14.607  25.742  1.00  0.02
ATOM   3604  N   ILE   408      37.094  14.298  27.749  1.00  0.02
ATOM   3606  CA  ILE   408      37.518  15.608  28.258  1.00  0.02
ATOM   3607  CB  ILE   408      36.774  15.874  29.563  1.00  0.01
ATOM   3608  CG2 ILE   408      37.256  17.164  30.212  1.00  0.02
ATOM   3609  CG1 ILE   408      35.271  15.945  29.326  1.00  0.02
ATOM   3610  CD1 ILE   408      34.512  16.107  30.639  1.00  0.01
ATOM   3611  C   ILE   408      39.027  15.658  28.498  1.00  0.02
ATOM   3612  O   ILE   408      39.663  16.675  28.200  1.00  0.02
ATOM   3613  N   LEU   409      39.616  14.505  28.769  1.00  0.02
ATOM   3615  CA  LEU   409      41.071  14.421  28.928  1.00  0.01
ATOM   3616  CB  LEU   409      41.385  13.226  29.821  1.00  0.02
ATOM   3617  CG  LEU   409      40.804  13.408  31.218  1.00  0.02
ATOM   3618  CD1 LEU   409      40.920  12.129  32.034  1.00  0.02
ATOM   3619  CD2 LEU   409      41.462  14.573  31.944  1.00  0.02
ATOM   3620  C   LEU   409      41.786  14.251  27.587  1.00  0.02
ATOM   3621  O   LEU   409      43.006  14.432  27.511  1.00  0.02
ATOM   3622  N   SER   410      41.022  13.993  26.537  1.00  0.02
ATOM   3624  CA  SER   410      41.575  13.824  25.198  1.00  0.02
ATOM   3625  CB  SER   410      40.703  12.823  24.454  1.00  0.02
ATOM   3626  OG  SER   410      40.875  11.555  25.070  1.00  0.01
ATOM   3627  C   SER   410      41.611  15.122  24.405  1.00  0.02
ATOM   3628  O   SER   410      42.409  15.232  23.464  1.00  0.02
ATOM   3629  N   PHE   411      40.842  16.114  24.822  1.00  0.02
ATOM   3631  CA  PHE   411      40.831  17.395  24.102  1.00  0.02
ATOM   3632  CB  PHE   411      39.567  17.498  23.263  1.00  0.02
ATOM   3633  CG  PHE   411      39.516  16.603  22.031  1.00  0.02
ATOM   3634  CD1 PHE   411      38.699  15.481  22.016  1.00  0.01
ATOM   3635  CE1 PHE   411      38.646  14.679  20.884  1.00  0.02
ATOM   3636  CZ  PHE   411      39.406  15.004  19.768  1.00  0.02
ATOM   3637  CE2 PHE   411      40.218  16.130  19.782  1.00  0.02
ATOM   3638  CD2 PHE   411      40.270  16.932  20.913  1.00  0.02
ATOM   3639  C   PHE   411      40.874  18.599  25.032  1.00  0.02
ATOM   3640  O   PHE   411      39.844  19.009  25.578  1.00  0.02
ATOM   3641  N   ALA   412      42.017  19.258  25.055  1.00  0.01
ATOM   3643  CA  ALA   412      42.183  20.453  25.888  1.00  0.03
ATOM   3644  CB  ALA   412      43.099  20.120  27.060  1.00  0.01
ATOM   3645  C   ALA   412      42.766  21.605  25.076  1.00  0.02
ATOM   3646  O   ALA   412      43.605  21.394  24.193  1.00  0.02
ATOM   3647  N   ARG   413      42.296  22.810  25.348  1.00  0.03
ATOM   3649  CA  ARG   413      42.811  23.980  24.628  1.00  0.02
ATOM   3650  CB  ARG   413      41.984  25.208  24.980  1.00  0.02
ATOM   3651  CG  ARG   413      40.627  25.119  24.300  1.00  0.02
ATOM   3652  CD  ARG   413      39.767  26.352  24.544  1.00  0.02
ATOM   3653  NE  ARG   413      38.558  26.302  23.705  1.00  0.02
ATOM   3654  CZ  ARG   413      37.367  25.881  24.138  1.00  0.02
ATOM   3655  NH1 ARG   413      37.210  25.505  25.410  1.00  0.02
ATOM   3656  NH2 ARG   413      36.326  25.859  23.303  1.00  0.02
ATOM   3657  C   ARG   413      44.284  24.215  24.929  1.00  0.02
ATOM   3658  O   ARG   413      44.743  24.012  26.060  1.00  0.02
ATOM   3659  N   ARG   414      45.009  24.610  23.896  1.00  0.02
ATOM   3661  CA  ARG   414      46.464  24.794  23.992  1.00  0.02
ATOM   3662  CB  ARG   414      46.963  25.330  22.653  1.00  0.02
ATOM   3663  CG  ARG   414      48.483  25.420  22.603  1.00  0.70
ATOM   3664  CD  ARG   414      48.959  25.984  21.270  1.00  0.72
ATOM   3665  NE  ARG   414      48.425  27.339  21.060  1.00  1.93
ATOM   3666  CZ  ARG   414      49.199  28.421  20.948  1.00  2.71
ATOM   3667  NH1 ARG   414      50.527  28.304  21.022  1.00  3.48
ATOM   3668  NH2 ARG   414      48.645  29.621  20.760  1.00  2.82
ATOM   3669  C   ARG   414      46.827  25.762  25.117  1.00  0.03
ATOM   3670  O   ARG   414      46.241  26.841  25.244  1.00  0.03
ATOM   3671  N   GLY   415      47.660  25.279  26.026  1.00  0.02
ATOM   3673  CA  GLY   415      48.076  26.081  27.182  1.00  0.01
ATOM   3674  C   GLY   415      47.338  25.697  28.468  1.00  0.02
ATOM   3675  O   GLY   415      47.968  25.491  29.512  1.00  0.02
ATOM   3676  N   THR   416      46.041  25.450  28.348  1.00  0.02
ATOM   3678  CA  THR   416      45.177  25.210  29.513  1.00  0.02
ATOM   3679  CB  THR   416      43.755  25.630  29.165  1.00  0.02
ATOM   3680  OG1 THR   416      43.188  24.638  28.320  1.00  0.02
ATOM   3681  CG2 THR   416      43.717  26.977  28.451  1.00  0.03
ATOM   3682  C   THR   416      45.134  23.748  29.956  1.00  0.03
ATOM   3683  O   THR   416      44.365  23.417  30.868  1.00  0.02
ATOM   3684  N   LEU   417      46.020  22.922  29.422  1.00  0.02
ATOM   3686  CA  LEU   417      45.994  21.473  29.676  1.00  0.02
ATOM   3687  CB  LEU   417      47.129  20.775  28.922  1.00  0.02
ATOM   3688  CG  LEU   417      46.798  20.404  27.472  1.00  0.44
ATOM   3689  CD1 LEU   417      46.885  21.588  26.513  1.00  0.02
ATOM   3690  CD2 LEU   417      47.742  19.310  26.984  1.00  0.93
ATOM   3691  C   LEU   417      46.107  21.133  31.161  1.00  0.02
ATOM   3692  O   LEU   417      45.156  20.555  31.697  1.00  0.02
ATOM   3693  N   GLN   418      47.043  21.755  31.862  1.00  0.02
ATOM   3695  CA  GLN   418      47.228  21.458  33.293  1.00  0.01
ATOM   3696  CB  GLN   418      48.545  22.083  33.744  1.00  0.01
ATOM   3697  CG  GLN   418      48.762  21.978  35.255  1.00  0.02
ATOM   3698  CD  GLN   418      49.057  20.544  35.693  1.00  0.02
ATOM   3699  OE1 GLN   418      50.096  19.981  35.322  1.00  0.02
ATOM   3700  NE2 GLN   418      48.150  19.970  36.466  1.00  0.02
ATOM   3703  C   GLN   418      46.100  22.003  34.176  1.00  0.01
ATOM   3704  O   GLN   418      45.701  21.330  35.135  1.00  0.02
ATOM   3705  N   GLU   419      45.422  23.042  33.716  1.00  0.02
ATOM   3707  CA  GLU   419      44.345  23.620  34.516  1.00  0.03
ATOM   3708  CB  GLU   419      44.119  25.050  34.042  1.00  0.02
ATOM   3709  CG  GLU   419      43.037  25.757  34.849  1.00  0.02
ATOM   3710  CD  GLU   419      42.856  27.171  34.308  1.00  0.02
ATOM   3711  OE1 GLU   419      43.758  27.621  33.613  1.00  0.03
ATOM   3712  OE2 GLU   419      41.793  27.736  34.517  1.00  0.03
ATOM   3713  C   GLU   419      43.070  22.806  34.336  1.00  0.03
ATOM   3714  O   GLU   419      42.380  22.509  35.321  1.00  0.02
ATOM   3715  N   LYS   420      42.951  22.203  33.165  1.00  0.03
ATOM   3717  CA  LYS   420      41.796  21.367  32.869  1.00  0.03
ATOM   3718  CB  LYS   420      41.661  21.286  31.353  1.00  0.02
ATOM   3719  CG  LYS   420      40.339  20.659  30.930  1.00  0.01
ATOM   3720  CD  LYS   420      40.088  20.894  29.446  1.00  0.02
ATOM   3721  CE  LYS   420      38.702  20.415  29.031  1.00  0.01
ATOM   3722  NZ  LYS   420      38.401  20.813  27.647  1.00  0.02
ATOM   3723  C   LYS   420      41.972  19.983  33.483  1.00  0.03
ATOM   3724  O   LYS   420      41.009  19.459  34.054  1.00  0.03
ATOM   3725  N   LEU   421      43.217  19.574  33.669  1.00  0.03
ATOM   3727  CA  LEU   421      43.495  18.308  34.359  1.00  0.01
ATOM   3728  CB  LEU   421      44.949  17.916  34.123  1.00  0.03
ATOM   3729  CG  LEU   421      45.244  17.669  32.651  1.00  0.03
ATOM   3730  CD1 LEU   421      46.729  17.419  32.429  1.00  0.02
ATOM   3731  CD2 LEU   421      44.417  16.517  32.101  1.00  0.02
ATOM   3732  C   LEU   421      43.273  18.433  35.861  1.00  0.01
ATOM   3733  O   LEU   421      42.737  17.506  36.479  1.00  0.02
ATOM   3734  N   THR   422      43.436  19.638  36.382  1.00  0.02
ATOM   3736  CA  THR   422      43.201  19.865  37.807  1.00  0.02
ATOM   3737  CB  THR   422      43.891  21.165  38.205  1.00  0.03
ATOM   3738  OG1 THR   422      45.275  21.046  37.900  1.00  0.08
ATOM   3739  CG2 THR   422      43.757  21.444  39.698  1.00  0.02
ATOM   3740  C   THR   422      41.705  19.960  38.098  1.00  0.01
ATOM   3741  O   THR   422      41.233  19.362  39.074  1.00  0.02
ATOM   3742  N   SER   423      40.950  20.453  37.129  1.00  0.02
ATOM   3744  CA  SER   423      39.497  20.545  37.296  1.00  0.02
ATOM   3745  CB  SER   423      38.957  21.543  36.282  1.00  0.02
ATOM   3746  OG  SER   423      37.541  21.531  36.398  1.00  0.02
ATOM   3747  C   SER   423      38.802  19.202  37.084  1.00  0.02
ATOM   3748  O   SER   423      37.897  18.849  37.852  1.00  0.03
ATOM   3749  N   VAL   424      39.360  18.380  36.210  1.00  0.01
ATOM   3751  CA  VAL   424      38.791  17.052  35.966  1.00  0.02
ATOM   3752  CB  VAL   424      39.162  16.607  34.553  1.00  0.02
ATOM   3753  CG1 VAL   424      38.639  15.208  34.238  1.00  0.02
ATOM   3754  CG2 VAL   424      38.621  17.596  33.529  1.00  0.02
ATOM   3755  C   VAL   424      39.264  16.035  37.003  1.00  0.02
ATOM   3756  O   VAL   424      38.561  15.044  37.233  1.00  0.01
ATOM   3757  N   ALA   425      40.242  16.410  37.813  1.00  0.02
ATOM   3759  CA  ALA   425      40.705  15.526  38.883  1.00  0.02
ATOM   3760  CB  ALA   425      41.996  16.097  39.452  1.00  0.02
ATOM   3761  C   ALA   425      39.669  15.388  39.995  1.00  0.01
ATOM   3762  O   ALA   425      39.426  14.267  40.459  1.00  0.02
ATOM   3763  N   GLY   426      38.881  16.433  40.197  1.00  0.02
ATOM   3765  CA  GLY   426      37.780  16.368  41.163  1.00  0.01
ATOM   3766  C   GLY   426      36.676  15.430  40.676  1.00  0.02
ATOM   3767  O   GLY   426      36.316  14.474  41.373  1.00  0.02
ATOM   3768  N   LEU   427      36.343  15.556  39.401  1.00  0.02
ATOM   3770  CA  LEU   427      35.239  14.787  38.814  1.00  0.01
ATOM   3771  CB  LEU   427      34.918  15.437  37.475  1.00  0.01
ATOM   3772  CG  LEU   427      34.594  16.918  37.644  1.00  0.02
ATOM   3773  CD1 LEU   427      34.590  17.641  36.302  1.00  0.02
ATOM   3774  CD2 LEU   427      33.276  17.122  38.386  1.00  0.02
ATOM   3775  C   LEU   427      35.589  13.314  38.588  1.00  0.02
ATOM   3776  O   LEU   427      34.748  12.439  38.839  1.00  0.03
ATOM   3777  N   ALA   428      36.860  13.039  38.338  1.00  0.02
ATOM   3779  CA  ALA   428      37.320  11.660  38.142  1.00  0.02
ATOM   3780  CB  ALA   428      38.565  11.679  37.263  1.00  0.02
ATOM   3781  C   ALA   428      37.626  10.956  39.462  1.00  0.02
ATOM   3782  O   ALA   428      37.568   9.720  39.524  1.00  0.03
ATOM   3783  N   PHE   429      37.686  11.726  40.538  1.00  0.02
ATOM   3785  CA  PHE   429      37.849  11.154  41.877  1.00  0.02
ATOM   3786  CB  PHE   429      38.243  12.289  42.826  1.00  0.02
ATOM   3787  CG  PHE   429      37.740  12.144  44.259  1.00  0.89
ATOM   3788  CD1 PHE   429      38.317  11.223  45.121  1.00  2.00
ATOM   3789  CE1 PHE   429      37.832  11.083  46.413  1.00  2.84
ATOM   3790  CZ  PHE   429      36.777  11.875  46.848  1.00  2.59
ATOM   3791  CE2 PHE   429      36.215  12.811  45.993  1.00  1.50
ATOM   3792  CD2 PHE   429      36.698  12.948  44.701  1.00  0.67
ATOM   3793  C   PHE   429      36.566  10.467  42.348  1.00  0.02
ATOM   3794  O   PHE   429      36.645   9.408  42.987  1.00  0.01
ATOM   3795  N   HIS   430      35.437  10.874  41.785  1.00  0.01
ATOM   3797  CA  HIS   430      34.160  10.232  42.112  1.00  0.02
ATOM   3798  CB  HIS   430      33.027  11.190  41.772  1.00  0.01
ATOM   3799  CG  HIS   430      33.122  12.554  42.421  1.00  0.01
ATOM   3800  ND1 HIS   430      33.034  13.734  41.782  1.00  0.02
ATOM   3802  CE1 HIS   430      33.167  14.734  42.675  1.00  0.02
ATOM   3803  NE2 HIS   430      33.324  14.176  43.897  1.00  0.02
ATOM   3804  CD2 HIS   430      33.293  12.831  43.757  1.00  0.01
ATOM   3805  C   HIS   430      33.941   8.943  41.319  1.00  0.02
ATOM   3806  O   HIS   430      33.000   8.198  41.606  1.00  0.02
ATOM   3807  N   SER   431      34.829   8.653  40.381  1.00  0.02
ATOM   3809  CA  SER   431      34.711   7.440  39.577  1.00  0.02
ATOM   3810  CB  SER   431      35.158   7.764  38.156  1.00  0.01
ATOM   3811  OG  SER   431      34.299   8.783  37.657  1.00  0.01
ATOM   3812  C   SER   431      35.533   6.285  40.155  1.00  0.03
ATOM   3813  O   SER   431      35.543   5.189  39.582  1.00  0.02
ATOM   3814  N   GLY   432      36.227   6.522  41.257  1.00  0.02
ATOM   3816  CA  GLY   432      36.953   5.433  41.916  1.00  0.02
ATOM   3817  C   GLY   432      38.461   5.599  41.803  1.00  0.02
ATOM   3818  O   GLY   432      38.964   6.159  40.822  1.00  0.03
ATOM   3819  N   GLU   433      39.163   4.880  42.665  1.00  0.01
ATOM   3821  CA  GLU   433      40.627   5.006  42.785  1.00  0.02
ATOM   3822  CB  GLU   433      41.151   4.137  43.937  1.00  0.02
ATOM   3823  CG  GLU   433      40.909   4.678  45.350  1.00  0.02
ATOM   3824  CD  GLU   433      39.485   4.420  45.851  1.00  0.02
ATOM   3825  OE1 GLU   433      38.843   3.557  45.271  1.00  0.57
ATOM   3826  OE2 GLU   433      39.011   5.219  46.641  1.00  0.76
ATOM   3827  C   GLU   433      41.342   4.557  41.518  1.00  0.02
ATOM   3828  O   GLU   433      42.071   5.343  40.898  1.00  0.02
ATOM   3829  N   GLU   434      40.911   3.419  41.000  1.00  0.03
ATOM   3831  CA  GLU   434      41.563   2.834  39.825  1.00  0.01
ATOM   3832  CB  GLU   434      41.277   1.330  39.738  1.00  0.02
ATOM   3833  CG  GLU   434      42.035   0.463  40.752  1.00  0.01
ATOM   3834  CD  GLU   434      41.404   0.499  42.144  1.00  0.98
ATOM   3835  OE1 GLU   434      42.156   0.490  43.107  1.00  1.21
ATOM   3836  OE2 GLU   434      40.214   0.786  42.206  1.00  1.55
ATOM   3837  C   GLU   434      41.093   3.503  38.539  1.00  0.02
ATOM   3838  O   GLU   434      41.888   3.629  37.601  1.00  0.03
ATOM   3839  N   GLU   435      39.956   4.173  38.601  1.00  0.01
ATOM   3841  CA  GLU   435      39.442   4.847  37.417  1.00  0.02
ATOM   3842  CB  GLU   435      37.948   5.059  37.597  1.00  0.03
ATOM   3843  CG  GLU   435      37.230   5.246  36.269  1.00  0.02
ATOM   3844  CD  GLU   435      36.914   3.886  35.648  1.00  0.02
ATOM   3845  OE1 GLU   435      37.479   2.902  36.105  1.00  0.02
ATOM   3846  OE2 GLU   435      35.989   3.839  34.848  1.00  0.02
ATOM   3847  C   GLU   435      40.125   6.197  37.270  1.00  0.02
ATOM   3848  O   GLU   435      40.587   6.524  36.172  1.00  0.03
ATOM   3849  N   TYR   436      40.436   6.812  38.400  1.00  0.01
ATOM   3851  CA  TYR   436      41.164   8.082  38.406  1.00  0.01
ATOM   3852  CB  TYR   436      41.106   8.639  39.825  1.00  0.02
ATOM   3853  CG  TYR   436      41.857   9.952  40.021  1.00  0.02
ATOM   3854  CD1 TYR   436      41.229  11.150  39.714  1.00  0.03
ATOM   3855  CE1 TYR   436      41.905  12.350  39.880  1.00  0.01
ATOM   3856  CZ  TYR   436      43.207  12.349  40.357  1.00  0.02
ATOM   3857  OH  TYR   436      43.895  13.538  40.447  1.00  0.03
ATOM   3858  CE2 TYR   436      43.835  11.155  40.682  1.00  0.01
ATOM   3859  CD2 TYR   436      43.156   9.955  40.516  1.00  0.01
ATOM   3860  C   TYR   436      42.619   7.869  38.007  1.00  0.02
ATOM   3861  O   TYR   436      43.146   8.598  37.153  1.00  0.02
ATOM   3862  N   ASN   437      43.165   6.738  38.424  1.00  0.02
ATOM   3864  CA  ASN   437      44.543   6.395  38.076  1.00  0.02
ATOM   3865  CB  ASN   437      44.938   5.198  38.935  1.00  0.02
ATOM   3866  CG  ASN   437      46.406   4.814  38.761  1.00  0.02
ATOM   3867  OD1 ASN   437      46.745   3.627  38.809  1.00  1.10
ATOM   3868  ND2 ASN   437      47.264   5.806  38.589  1.00  1.10
ATOM   3871  C   ASN   437      44.665   6.055  36.592  1.00  0.02
ATOM   3872  O   ASN   437      45.535   6.622  35.922  1.00  0.01
ATOM   3873  N   ARG   438      43.651   5.409  36.040  1.00  0.01
ATOM   3875  CA  ARG   438      43.672   5.061  34.618  1.00  0.02
ATOM   3876  CB  ARG   438      42.577   4.033  34.381  1.00  0.03
ATOM   3877  CG  ARG   438      42.527   3.597  32.925  1.00  0.02
ATOM   3878  CD  ARG   438      41.255   2.808  32.649  1.00  0.02
ATOM   3879  NE  ARG   438      40.071   3.629  32.951  1.00  0.01
ATOM   3880  CZ  ARG   438      39.365   4.265  32.013  1.00  0.02
ATOM   3881  NH1 ARG   438      39.727   4.180  30.732  1.00  0.01
ATOM   3882  NH2 ARG   438      38.299   4.990  32.358  1.00  0.02
ATOM   3883  C   ARG   438      43.416   6.269  33.718  1.00  0.02
ATOM   3884  O   ARG   438      44.154   6.463  32.744  1.00  0.02
ATOM   3885  N   LEU   439      42.578   7.186  34.179  1.00  0.02
ATOM   3887  CA  LEU   439      42.251   8.390  33.403  1.00  0.02
ATOM   3888  CB  LEU   439      41.043   9.065  34.049  1.00  0.02
ATOM   3889  CG  LEU   439      39.740   8.323  33.776  1.00  0.02
ATOM   3890  CD1 LEU   439      38.609   8.845  34.654  1.00  0.02
ATOM   3891  CD2 LEU   439      39.366   8.421  32.306  1.00  0.01
ATOM   3892  C   LEU   439      43.396   9.397  33.363  1.00  0.02
ATOM   3893  O   LEU   439      43.577  10.091  32.356  1.00  0.02
ATOM   3894  N   PHE   440      44.221   9.400  34.395  1.00  0.02
ATOM   3896  CA  PHE   440      45.356  10.321  34.432  1.00  0.02
ATOM   3897  CB  PHE   440      45.383  11.028  35.777  1.00  0.03
ATOM   3898  CG  PHE   440      44.346  12.144  35.838  1.00  0.02
ATOM   3899  CD1 PHE   440      43.085  11.913  36.372  1.00  0.03
ATOM   3900  CE1 PHE   440      42.147  12.936  36.402  1.00  0.02
ATOM   3901  CZ  PHE   440      42.470  14.189  35.899  1.00  0.02
ATOM   3902  CE2 PHE   440      43.731  14.420  35.366  1.00  0.03
ATOM   3903  CD2 PHE   440      44.667  13.396  35.333  1.00  0.03
ATOM   3904  C   PHE   440      46.681   9.643  34.116  1.00  0.03
ATOM   3905  O   PHE   440      47.719  10.316  34.020  1.00  0.01
ATOM   3906  N   SER   441      46.614   8.362  33.798  1.00  0.02
ATOM   3908  CA  SER   441      47.807   7.598  33.412  1.00  0.01
ATOM   3909  CB  SER   441      47.409   6.170  33.066  1.00  0.02
ATOM   3910  OG  SER   441      48.594   5.501  32.657  1.00  1.14
ATOM   3911  C   SER   441      48.632   8.200  32.259  1.00  0.02
ATOM   3912  O   SER   441      49.833   8.363  32.497  1.00  0.02
ATOM   3913  N   PRO   442      48.079   8.647  31.127  1.00  0.02
ATOM   3914  CA  PRO   442      48.941   9.259  30.095  1.00  0.03
ATOM   3915  CB  PRO   442      48.091   9.333  28.864  1.00  0.02
ATOM   3916  CG  PRO   442      46.651   9.018  29.222  1.00  0.01
ATOM   3917  CD  PRO   442      46.671   8.604  30.679  1.00  0.02
ATOM   3918  C   PRO   442      49.488  10.663  30.416  1.00  0.02
ATOM   3919  O   PRO   442      50.178  11.240  29.568  1.00  0.02
ATOM   3920  N   PHE   443      49.157  11.229  31.566  1.00  0.03
ATOM   3922  CA  PHE   443      49.664  12.552  31.923  1.00  0.02
ATOM   3923  CB  PHE   443      48.507  13.387  32.458  1.00  0.02
ATOM   3924  CG  PHE   443      47.350  13.531  31.476  1.00  0.01
ATOM   3925  CD1 PHE   443      46.137  12.905  31.732  1.00  0.02
ATOM   3926  CE1 PHE   443      45.087  13.035  30.834  1.00  0.02
ATOM   3927  CZ  PHE   443      45.250  13.795  29.682  1.00  0.02
ATOM   3928  CE2 PHE   443      46.461  14.423  29.428  1.00  0.01
ATOM   3929  CD2 PHE   443      47.512  14.292  30.325  1.00  0.02
ATOM   3930  C   PHE   443      50.755  12.455  32.984  1.00  0.03
ATOM   3931  O   PHE   443      51.532  13.408  33.151  1.00  0.03
ATOM   3932  N   VAL   444      50.871  11.288  33.603  1.00  0.02
ATOM   3934  CA  VAL   444      51.853  11.062  34.677  1.00  0.02
ATOM   3935  CB  VAL   444      51.737   9.608  35.138  1.00  0.01
ATOM   3936  CG1 VAL   444      52.803   9.245  36.168  1.00  0.05
ATOM   3937  CG2 VAL   444      50.351   9.303  35.692  1.00  0.09
ATOM   3938  C   VAL   444      53.275  11.333  34.198  1.00  0.01
ATOM   3939  O   VAL   444      53.704  10.815  33.162  1.00  0.02
ATOM   3940  N   GLY   445      53.928  12.276  34.858  1.00  0.02
ATOM   3942  CA  GLY   445      55.316  12.601  34.523  1.00  0.03
ATOM   3943  C   GLY   445      55.445  13.916  33.757  1.00  0.02
ATOM   3944  O   GLY   445      56.463  14.607  33.874  1.00  0.02
ATOM   3945  N   SER   446      54.455  14.224  32.935  1.00  0.02
ATOM   3947  CA  SER   446      54.503  15.456  32.149  1.00  0.02
ATOM   3948  CB  SER   446      53.961  15.154  30.758  1.00  0.03
ATOM   3949  OG  SER   446      54.734  14.090  30.222  1.00  1.24
ATOM   3950  C   SER   446      53.649  16.532  32.803  1.00  0.03
ATOM   3951  O   SER   446      53.916  17.732  32.670  1.00  0.02
ATOM   3952  N   PHE   447      52.625  16.085  33.506  1.00  0.02
ATOM   3954  CA  PHE   447      51.755  17.007  34.235  1.00  0.02
ATOM   3955  CB  PHE   447      50.364  16.980  33.613  1.00  0.03
ATOM   3956  CG  PHE   447      50.320  17.566  32.202  1.00  0.02
ATOM   3957  CD1 PHE   447      50.388  18.942  32.031  1.00  0.02
ATOM   3958  CE1 PHE   447      50.358  19.485  30.754  1.00  0.02
ATOM   3959  CZ  PHE   447      50.259  18.652  29.647  1.00  0.02
ATOM   3960  CE2 PHE   447      50.190  17.275  29.818  1.00  0.02
ATOM   3961  CD2 PHE   447      50.220  16.732  31.096  1.00  0.02
ATOM   3962  C   PHE   447      51.685  16.663  35.716  1.00  0.03
ATOM   3963  O   PHE   447      51.825  15.500  36.125  1.00  0.03
ATOM   3964  N   GLU   448      51.436  17.691  36.507  1.00  0.02
ATOM   3966  CA  GLU   448      51.326  17.534  37.960  1.00  0.02
ATOM   3967  CB  GLU   448      51.723  18.841  38.639  1.00  0.03
ATOM   3968  CG  GLU   448      51.668  18.717  40.160  1.00  0.03
ATOM   3969  CD  GLU   448      52.025  20.051  40.809  1.00  0.03
ATOM   3970  OE1 GLU   448      51.521  20.311  41.892  1.00  0.02
ATOM   3971  OE2 GLU   448      52.792  20.787  40.204  1.00  0.03
ATOM   3972  C   GLU   448      49.897  17.171  38.345  1.00  0.03
ATOM   3973  O   GLU   448      49.026  18.038  38.487  1.00  0.03
ATOM   3974  N   ILE   449      49.661  15.878  38.461  1.00  0.03
ATOM   3976  CA  ILE   449      48.347  15.381  38.865  1.00  0.01
ATOM   3977  CB  ILE   449      48.252  13.942  38.371  1.00  0.03
ATOM   3978  CG2 ILE   449      46.841  13.387  38.538  1.00  0.02
ATOM   3979  CG1 ILE   449      48.666  13.887  36.906  1.00  0.03
ATOM   3980  CD1 ILE   449      48.757  12.451  36.416  1.00  0.02
ATOM   3981  C   ILE   449      48.215  15.437  40.386  1.00  0.02
ATOM   3982  O   ILE   449      49.140  15.044  41.107  1.00  0.02
ATOM   3983  N   PRO   450      47.135  16.041  40.853  1.00  0.02
ATOM   3984  CA  PRO   450      46.813  16.022  42.282  1.00  0.02
ATOM   3985  CB  PRO   450      45.566  16.841  42.416  1.00  0.02
ATOM   3986  CG  PRO   450      45.104  17.285  41.035  1.00  0.03
ATOM   3987  CD  PRO   450      46.116  16.723  40.050  1.00  0.03
ATOM   3988  C   PRO   450      46.600  14.593  42.778  1.00  0.03
ATOM   3989  O   PRO   450      46.183  13.713  42.018  1.00  0.03
ATOM   3990  N   SER   451      46.965  14.346  44.023  1.00  0.02
ATOM   3992  CA  SER   451      46.768  13.001  44.569  1.00  0.02
ATOM   3993  CB  SER   451      47.561  12.809  45.858  1.00  0.02
ATOM   3994  OG  SER   451      46.784  13.306  46.940  1.00  0.03
ATOM   3995  C   SER   451      45.293  12.771  44.861  1.00  0.03
ATOM   3996  O   SER   451      44.571  13.679  45.295  1.00  0.03
ATOM   3997  N   TYR   452      44.912  11.507  44.796  1.00  0.02
ATOM   3999  CA  TYR   452      43.533  11.113  45.094  1.00  0.02
ATOM   4000  CB  TYR   452      43.372   9.657  44.662  1.00  0.02
ATOM   4001  CG  TYR   452      41.953   9.097  44.707  1.00  0.02
ATOM   4002  CD1 TYR   452      41.199   9.051  43.541  1.00  0.02
ATOM   4003  CE1 TYR   452      39.913   8.530  43.564  1.00  0.02
ATOM   4004  CZ  TYR   452      39.383   8.054  44.755  1.00  0.02
ATOM   4005  OH  TYR   452      38.130   7.481  44.764  1.00  0.03
ATOM   4006  CE2 TYR   452      40.131   8.100  45.924  1.00  0.02
ATOM   4007  CD2 TYR   452      41.420   8.616  45.898  1.00  0.02
ATOM   4008  C   TYR   452      43.245  11.242  46.589  1.00  0.03
ATOM   4009  O   TYR   452      42.141  11.650  46.961  1.00  0.02
ATOM   4010  N   ARG   453      44.289  11.170  47.401  1.00  0.03
ATOM   4012  CA  ARG   453      44.121  11.318  48.845  1.00  0.03
ATOM   4013  CB  ARG   453      45.393  10.845  49.538  1.00  0.03
ATOM   4014  CG  ARG   453      45.208  10.818  51.049  1.00  0.02
ATOM   4015  CD  ARG   453      44.068   9.882  51.435  1.00  0.03
ATOM   4016  NE  ARG   453      43.857   9.871  52.889  1.00  0.03
ATOM   4017  CZ  ARG   453      42.649   9.971  53.446  1.00  0.03
ATOM   4018  NH1 ARG   453      41.572  10.136  52.676  1.00  0.02
ATOM   4019  NH2 ARG   453      42.522   9.941  54.775  1.00  0.02
ATOM   4020  C   ARG   453      43.823  12.765  49.238  1.00  0.03
ATOM   4021  O   ARG   453      42.866  12.986  49.990  1.00  0.03
ATOM   4022  N   CYS   454      44.440  13.734  48.574  1.00  0.03
ATOM   4024  CA  CYS   454      44.120  15.131  48.875  1.00  0.00
ATOM   4025  CB  CYS   454      45.213  16.008  48.276  1.00  0.03
ATOM   4026  SG  CYS   454      45.025  17.783  48.554  1.00  0.19
ATOM   4027  C   CYS   454      42.767  15.551  48.306  1.00  0.03
ATOM   4028  O   CYS   454      42.035  16.287  48.979  1.00  0.02
ATOM   4029  N   LEU   455      42.331  14.890  47.245  1.00  0.01
ATOM   4031  CA  LEU   455      41.002  15.175  46.697  1.00  0.02
ATOM   4032  CB  LEU   455      40.928  14.630  45.277  1.00  0.02
ATOM   4033  CG  LEU   455      41.927  15.327  44.362  1.00  0.02
ATOM   4034  CD1 LEU   455      42.000  14.628  43.012  1.00  0.01
ATOM   4035  CD2 LEU   455      41.585  16.804  44.194  1.00  0.02
ATOM   4036  C   LEU   455      39.911  14.527  47.543  1.00  0.03
ATOM   4037  O   LEU   455      38.855  15.136  47.757  1.00  0.02
ATOM   4038  N   ARG   456      40.260  13.446  48.219  1.00  0.03
ATOM   4040  CA  ARG   456      39.310  12.805  49.119  1.00  0.02
ATOM   4041  CB  ARG   456      39.743  11.370  49.375  1.00  0.02
ATOM   4042  CG  ARG   456      38.725  10.689  50.276  1.00  0.02
ATOM   4043  CD  ARG   456      38.896   9.176  50.304  1.00  0.96
ATOM   4044  NE  ARG   456      37.877   8.573  51.178  1.00  0.85
ATOM   4045  CZ  ARG   456      36.657   8.216  50.765  1.00  0.02
ATOM   4046  NH1 ARG   456      36.318   8.330  49.477  1.00  1.66
ATOM   4047  NH2 ARG   456      35.787   7.704  51.636  1.00  0.86
ATOM   4048  C   ARG   456      39.198  13.560  50.433  1.00  0.02
ATOM   4049  O   ARG   456      38.073  13.836  50.862  1.00  0.02
ATOM   4050  N   LEU   457      40.292  14.162  50.869  1.00  0.03
ATOM   4052  CA  LEU   457      40.247  14.992  52.078  1.00  0.02
ATOM   4053  CB  LEU   457      41.677  15.242  52.538  1.00  0.03
ATOM   4054  CG  LEU   457      42.311  13.967  53.078  1.00  0.01
ATOM   4055  CD1 LEU   457      43.808  14.149  53.299  1.00  0.03
ATOM   4056  CD2 LEU   457      41.615  13.531  54.363  1.00  0.03
ATOM   4057  C   LEU   457      39.546  16.325  51.819  1.00  0.03
ATOM   4058  O   LEU   457      38.787  16.793  52.679  1.00  0.02
ATOM   4059  N   ARG   458      39.566  16.755  50.569  1.00  0.02
ATOM   4061  CA  ARG   458      38.863  17.968  50.165  1.00  0.02
ATOM   4062  CB  ARG   458      39.397  18.347  48.792  1.00  0.02
ATOM   4063  CG  ARG   458      38.855  19.678  48.299  1.00  0.03
ATOM   4064  CD  ARG   458      39.389  19.967  46.902  1.00  0.03
ATOM   4065  NE  ARG   458      40.850  19.788  46.870  1.00  0.03
ATOM   4066  CZ  ARG   458      41.719  20.801  46.835  1.00  0.02
ATOM   4067  NH1 ARG   458      41.279  22.061  46.809  1.00  0.02
ATOM   4068  NH2 ARG   458      43.030  20.552  46.812  1.00  0.03
ATOM   4069  C   ARG   458      37.353  17.741  50.083  1.00  0.02
ATOM   4070  O   ARG   458      36.596  18.579  50.585  1.00  0.03
ATOM   4071  N   TRP   459      36.947  16.534  49.715  1.00  0.02
ATOM   4073  CA  TRP   459      35.517  16.198  49.642  1.00  0.03
ATOM   4074  CB  TRP   459      35.342  15.112  48.584  1.00  0.02
ATOM   4075  CG  TRP   459      33.905  14.697  48.335  1.00  0.03
ATOM   4076  CD1 TRP   459      32.899  15.475  47.807  1.00  0.01
ATOM   4077  NE1 TRP   459      31.759  14.741  47.764  1.00  0.01
ATOM   4079  CE2 TRP   459      31.969  13.495  48.233  1.00  0.02
ATOM   4080  CZ2 TRP   459      31.133  12.400  48.397  1.00  0.01
ATOM   4081  CH2 TRP   459      31.642  11.216  48.916  1.00  0.01
ATOM   4082  CZ3 TRP   459      32.984  11.126  49.277  1.00  0.02
ATOM   4083  CE3 TRP   459      33.826  12.219  49.120  1.00  0.01
ATOM   4084  CD2 TRP   459      33.322  13.402  48.601  1.00  0.03
ATOM   4085  C   TRP   459      34.954  15.726  50.990  1.00  0.03
ATOM   4086  O   TRP   459      33.732  15.704  51.186  1.00  0.03
ATOM   4087  N   VAL   460      35.836  15.414  51.928  1.00  0.03
ATOM   4089  CA  VAL   460      35.407  15.116  53.301  1.00  0.02
ATOM   4090  CB  VAL   460      36.426  14.166  53.938  1.00  0.03
ATOM   4091  CG1 VAL   460      36.192  13.973  55.433  1.00  0.03
ATOM   4092  CG2 VAL   460      36.437  12.815  53.234  1.00  0.02
ATOM   4093  C   VAL   460      35.306  16.412  54.111  1.00  0.03
ATOM   4094  O   VAL   460      34.536  16.504  55.075  1.00  0.02
ATOM   4095  N   HIS   461      35.994  17.438  53.639  1.00  0.03
ATOM   4097  CA  HIS   461      35.905  18.757  54.260  1.00  0.02
ATOM   4098  CB  HIS   461      37.145  19.555  53.879  1.00  0.02
ATOM   4099  CG  HIS   461      37.235  20.930  54.512  1.00  0.03
ATOM   4100  ND1 HIS   461      36.866  21.266  55.763  1.00  1.45
ATOM   4102  CE1 HIS   461      37.095  22.583  55.956  1.00  1.67
ATOM   4103  NE2 HIS   461      37.631  23.074  54.814  1.00  1.32
ATOM   4104  CD2 HIS   461      37.723  22.068  53.918  1.00  1.11
ATOM   4105  C   HIS   461      34.642  19.481  53.790  1.00  0.02
ATOM   4106  O   HIS   461      34.022  20.108  54.636  1.00  0.02
ATOM   4107  OXT HIS   461      34.256  19.287  52.649  1.00  0.02
TER  
